# Supplementary material for: Three-dimensional single-cell transcriptome imaging of thick tissues
Source: eLife. 2024 Dec 27;12:RP90029. doi: 10.7554/eLife.90029 (PMC11677232; doi:10.7554/eLife.90029)
Supplement: Figure 1—figure supplement 2—source data 1. [file elife-90029-fig1-figsupp2-data1.xlsx]

## Sheet: panel a
RNA molecule number / fov	Tissue Depth
7565	10 um
7914	90 um

## Sheet: panel b
Tissue Depth	log10(integrated photon counts)
10 um	2.5
10 um	2.50016
10 um	2.50032
10 um	2.50048
10 um	2.50064
10 um	2.50079
10 um	2.50095
10 um	2.50111
10 um	2.50127
10 um	2.50143
10 um	2.50159
10 um	2.50175
10 um	2.50191
10 um	2.50207
10 um	2.50223
10 um	2.50238
10 um	2.50254
10 um	2.5027
10 um	2.50286
10 um	2.50302
10 um	2.50318
10 um	2.50334
10 um	2.5035
10 um	2.50366
10 um	2.50382
10 um	2.50397
10 um	2.50413
10 um	2.50429
10 um	2.50445
10 um	2.50461
10 um	2.50477
10 um	2.50493
10 um	2.50509
10 um	2.50525
10 um	2.5054
10 um	2.50556
10 um	2.50572
10 um	2.50588
10 um	2.50604
10 um	2.5062
10 um	2.50636
10 um	2.50652
10 um	2.50668
10 um	2.50684
10 um	2.50699
10 um	2.50715
10 um	2.50731
10 um	2.50747
10 um	2.50763
10 um	2.50779
10 um	2.50795
10 um	2.50811
10 um	2.50827
10 um	2.50842
10 um	2.50858
10 um	2.50874
10 um	2.5089
10 um	2.50906
10 um	2.50922
10 um	2.50938
10 um	2.50954
10 um	2.5097
10 um	2.50986
10 um	2.51001
10 um	2.51017
10 um	2.51033
10 um	2.51049
10 um	2.51065
10 um	2.51081
10 um	2.51097
10 um	2.51113
10 um	2.51129
10 um	2.51145
10 um	2.5116
10 um	2.51176
10 um	2.51192
10 um	2.51208
10 um	2.51224
10 um	2.5124
10 um	2.51256
10 um	2.51272
10 um	2.51288
10 um	2.51303
10 um	2.51319
10 um	2.51335
10 um	2.51351
10 um	2.51367
10 um	2.51383
10 um	2.51399
10 um	2.51415
10 um	2.51431
10 um	2.51447
10 um	2.51462
10 um	2.51478
10 um	2.51494
10 um	2.5151
10 um	2.51526
10 um	2.51542
10 um	2.51558
10 um	2.51574
10 um	2.5159
10 um	2.51606
10 um	2.51621
10 um	2.51637
10 um	2.51653
10 um	2.51669
10 um	2.51685
10 um	2.51701
10 um	2.51717
10 um	2.51733
10 um	2.51749
10 um	2.51764
10 um	2.5178
10 um	2.51796
10 um	2.51812
10 um	2.51828
10 um	2.51844
10 um	2.5186
10 um	2.51876
10 um	2.51892
10 um	2.51908
10 um	2.51923
10 um	2.51939
10 um	2.51955
10 um	2.51971
10 um	2.51987
10 um	2.52003
10 um	2.52019
10 um	2.52035
10 um	2.52051
10 um	2.52066
10 um	2.52082
10 um	2.52098
10 um	2.52114
10 um	2.5213
10 um	2.52146
10 um	2.52162
10 um	2.52178
10 um	2.52194
10 um	2.5221
10 um	2.52225
10 um	2.52241
10 um	2.52257
10 um	2.52273
10 um	2.52289
10 um	2.52305
10 um	2.52321
10 um	2.52337
10 um	2.52353
10 um	2.52369
10 um	2.52384
10 um	2.524
10 um	2.52416
10 um	2.52432
10 um	2.52448
10 um	2.52464
10 um	2.5248
10 um	2.52496
10 um	2.52512
10 um	2.52527
10 um	2.52543
10 um	2.52559
10 um	2.52575
10 um	2.52591
10 um	2.52607
10 um	2.52623
10 um	2.52639
10 um	2.52655
10 um	2.52671
10 um	2.52686
10 um	2.52702
10 um	2.52718
10 um	2.52734
10 um	2.5275
10 um	2.52766
10 um	2.52782
10 um	2.52798
10 um	2.52814
10 um	2.5283
10 um	2.52845
10 um	2.52861
10 um	2.52877
10 um	2.52893
10 um	2.52909
10 um	2.52925
10 um	2.52941
10 um	2.52957
10 um	2.52973
10 um	2.52988
10 um	2.53004
10 um	2.5302
10 um	2.53036
10 um	2.53052
10 um	2.53068
10 um	2.53084
10 um	2.531
10 um	2.53116
10 um	2.53132
10 um	2.53147
10 um	2.53163
10 um	2.53179
10 um	2.53195
10 um	2.53211
10 um	2.53227
10 um	2.53243
10 um	2.53259
10 um	2.53275
10 um	2.53291
10 um	2.53306
10 um	2.53322
10 um	2.53338
10 um	2.53354
10 um	2.5337
10 um	2.53386
10 um	2.53402
10 um	2.53418
10 um	2.53434
10 um	2.53449
10 um	2.53465
10 um	2.53481
10 um	2.53497
10 um	2.53513
10 um	2.53529
10 um	2.53545
10 um	2.53561
10 um	2.53577
10 um	2.53593
10 um	2.53608
10 um	2.53624
10 um	2.5364
10 um	2.53656
10 um	2.53672
10 um	2.53688
10 um	2.53704
10 um	2.5372
10 um	2.53736
10 um	2.53751
10 um	2.53767
10 um	2.53783
10 um	2.53799
10 um	2.53815
10 um	2.53831
10 um	2.53847
10 um	2.53863
10 um	2.53879
10 um	2.53895
10 um	2.5391
10 um	2.53926
10 um	2.53942
10 um	2.53958
10 um	2.53974
10 um	2.5399
10 um	2.54006
10 um	2.54022
10 um	2.54038
10 um	2.54054
10 um	2.54069
10 um	2.54085
10 um	2.54101
10 um	2.54117
10 um	2.54133
10 um	2.54149
10 um	2.54165
10 um	2.54181
10 um	2.54197
10 um	2.54212
10 um	2.54228
10 um	2.54244
10 um	2.5426
10 um	2.54276
10 um	2.54292
10 um	2.54308
10 um	2.54324
10 um	2.5434
10 um	2.54356
10 um	2.54371
10 um	2.54387
10 um	2.54403
10 um	2.54419
10 um	2.54435
10 um	2.54451
10 um	2.54467
10 um	2.54483
10 um	2.54499
10 um	2.54515
10 um	2.5453
10 um	2.54546
10 um	2.54562
10 um	2.54578
10 um	2.54594
10 um	2.5461
10 um	2.54626
10 um	2.54642
10 um	2.54658
10 um	2.54673
10 um	2.54689
10 um	2.54705
10 um	2.54721
10 um	2.54737
10 um	2.54753
10 um	2.54769
10 um	2.54785
10 um	2.54801
10 um	2.54817
10 um	2.54832
10 um	2.54848
10 um	2.54864
10 um	2.5488
10 um	2.54896
10 um	2.54912
10 um	2.54928
10 um	2.54944
10 um	2.5496
10 um	2.54975
10 um	2.54991
10 um	2.55007
10 um	2.55023
10 um	2.55039
10 um	2.55055
10 um	2.55071
10 um	2.55087
10 um	2.55103
10 um	2.55119
10 um	2.55134
10 um	2.5515
10 um	2.55166
10 um	2.55182
10 um	2.55198
10 um	2.55214
10 um	2.5523
10 um	2.55246
10 um	2.55262
10 um	2.55278
10 um	2.55293
10 um	2.55309
10 um	2.55325
10 um	2.55341
10 um	2.55357
10 um	2.55373
10 um	2.55389
10 um	2.55405
10 um	2.55421
10 um	2.55436
10 um	2.55452
10 um	2.55468
10 um	2.55484
10 um	2.555
10 um	2.55516
10 um	2.55532
10 um	2.55548
10 um	2.55564
10 um	2.5558
10 um	2.55595
10 um	2.55611
10 um	2.55627
10 um	2.55643
10 um	2.55659
10 um	2.55675
10 um	2.55691
10 um	2.55707
10 um	2.55723
10 um	2.55739
10 um	2.55754
10 um	2.5577
10 um	2.55786
10 um	2.55802
10 um	2.55818
10 um	2.55834
10 um	2.5585
10 um	2.55866
10 um	2.55882
10 um	2.55897
10 um	2.55913
10 um	2.55929
10 um	2.55945
10 um	2.55961
10 um	2.55977
10 um	2.55993
10 um	2.56009
10 um	2.56025
10 um	2.56041
10 um	2.56056
10 um	2.56072
10 um	2.56088
10 um	2.56104
10 um	2.5612
10 um	2.56136
10 um	2.56152
10 um	2.56168
10 um	2.56184
10 um	2.56199
10 um	2.56215
10 um	2.56231
10 um	2.56247
10 um	2.56263
10 um	2.56279
10 um	2.56295
10 um	2.56311
10 um	2.56327
10 um	2.56343
10 um	2.56358
10 um	2.56374
10 um	2.5639
10 um	2.56406
10 um	2.56422
10 um	2.56438
10 um	2.56454
10 um	2.5647
10 um	2.56486
10 um	2.56502
10 um	2.56517
10 um	2.56533
10 um	2.56549
10 um	2.56565
10 um	2.56581
10 um	2.56597
10 um	2.56613
10 um	2.56629
10 um	2.56645
10 um	2.5666
10 um	2.56676
10 um	2.56692
10 um	2.56708
10 um	2.56724
10 um	2.5674
10 um	2.56756
10 um	2.56772
10 um	2.56788
10 um	2.56804
10 um	2.56819
10 um	2.56835
10 um	2.56851
10 um	2.56867
10 um	2.56883
10 um	2.56899
10 um	2.56915
10 um	2.56931
10 um	2.56947
10 um	2.56963
10 um	2.56978
10 um	2.56994
10 um	2.5701
10 um	2.57026
10 um	2.57042
10 um	2.57058
10 um	2.57074
10 um	2.5709
10 um	2.57106
10 um	2.57121
10 um	2.57137
10 um	2.57153
10 um	2.57169
10 um	2.57185
10 um	2.57201
10 um	2.57217
10 um	2.57233
10 um	2.57249
10 um	2.57265
10 um	2.5728
10 um	2.57296
10 um	2.57312
10 um	2.57328
10 um	2.57344
10 um	2.5736
10 um	2.57376
10 um	2.57392
10 um	2.57408
10 um	2.57423
10 um	2.57439
10 um	2.57455
10 um	2.57471
10 um	2.57487
10 um	2.57503
10 um	2.57519
10 um	2.57535
10 um	2.57551
10 um	2.57567
10 um	2.57582
10 um	2.57598
10 um	2.57614
10 um	2.5763
10 um	2.57646
10 um	2.57662
10 um	2.57678
10 um	2.57694
10 um	2.5771
10 um	2.57726
10 um	2.57741
10 um	2.57757
10 um	2.57773
10 um	2.57789
10 um	2.57805
10 um	2.57821
10 um	2.57837
10 um	2.57853
10 um	2.57869
10 um	2.57884
10 um	2.579
10 um	2.57916
10 um	2.57932
10 um	2.57948
10 um	2.57964
10 um	2.5798
10 um	2.57996
10 um	2.58012
10 um	2.58028
10 um	2.58043
10 um	2.58059
10 um	2.58075
10 um	2.58091
10 um	2.58107
10 um	2.58123
10 um	2.58139
10 um	2.58155
10 um	2.58171
10 um	2.58187
10 um	2.58202
10 um	2.58218
10 um	2.58234
10 um	2.5825
10 um	2.58266
10 um	2.58282
10 um	2.58298
10 um	2.58314
10 um	2.5833
10 um	2.58345
10 um	2.58361
10 um	2.58377
10 um	2.58393
10 um	2.58409
10 um	2.58425
10 um	2.58441
10 um	2.58457
10 um	2.58473
10 um	2.58489
10 um	2.58504
10 um	2.5852
10 um	2.58536
10 um	2.58552
10 um	2.58568
10 um	2.58584
10 um	2.586
10 um	2.58616
10 um	2.58632
10 um	2.58648
10 um	2.58663
10 um	2.58679
10 um	2.58695
10 um	2.58711
10 um	2.58727
10 um	2.58743
10 um	2.58759
10 um	2.58775
10 um	2.58791
10 um	2.58806
10 um	2.58822
10 um	2.58838
10 um	2.58854
10 um	2.5887
10 um	2.58886
10 um	2.58902
10 um	2.58918
10 um	2.58934
10 um	2.5895
10 um	2.58965
10 um	2.58981
10 um	2.58997
10 um	2.59013
10 um	2.59029
10 um	2.59045
10 um	2.59061
10 um	2.59077
10 um	2.59093
10 um	2.59108
10 um	2.59124
10 um	2.5914
10 um	2.59156
10 um	2.59172
10 um	2.59188
10 um	2.59204
10 um	2.5922
10 um	2.59236
10 um	2.59252
10 um	2.59267
10 um	2.59283
10 um	2.59299
10 um	2.59315
10 um	2.59331
10 um	2.59347
10 um	2.59363
10 um	2.59379
10 um	2.59395
10 um	2.59411
10 um	2.59426
10 um	2.59442
10 um	2.59458
10 um	2.59474
10 um	2.5949
10 um	2.59506
10 um	2.59522
10 um	2.59538
10 um	2.59554
10 um	2.59569
10 um	2.59585
10 um	2.59601
10 um	2.59617
10 um	2.59633
10 um	2.59649
10 um	2.59665
10 um	2.59681
10 um	2.59697
10 um	2.59713
10 um	2.59728
10 um	2.59744
10 um	2.5976
10 um	2.59776
10 um	2.59792
10 um	2.59808
10 um	2.59824
10 um	2.5984
10 um	2.59856
10 um	2.59872
10 um	2.59887
10 um	2.59903
10 um	2.59919
10 um	2.59935
10 um	2.59951
10 um	2.59967
10 um	2.59983
10 um	2.59999
10 um	2.60015
10 um	2.6003
10 um	2.60046
10 um	2.60062
10 um	2.60078
10 um	2.60094
10 um	2.6011
10 um	2.60126
10 um	2.60142
10 um	2.60158
10 um	2.60174
10 um	2.60189
10 um	2.60205
10 um	2.60221
10 um	2.60237
10 um	2.60253
10 um	2.60269
10 um	2.60285
10 um	2.60301
10 um	2.60317
10 um	2.60332
10 um	2.60348
10 um	2.60364
10 um	2.6038
10 um	2.60396
10 um	2.60412
10 um	2.60428
10 um	2.60444
10 um	2.6046
10 um	2.60476
10 um	2.60491
10 um	2.60507
10 um	2.60523
10 um	2.60539
10 um	2.60555
10 um	2.60571
10 um	2.60587
10 um	2.60603
10 um	2.60619
10 um	2.60635
10 um	2.6065
10 um	2.60666
10 um	2.60682
10 um	2.60698
10 um	2.60714
10 um	2.6073
10 um	2.60746
10 um	2.60762
10 um	2.60778
10 um	2.60793
10 um	2.60809
10 um	2.60825
10 um	2.60841
10 um	2.60857
10 um	2.60873
10 um	2.60889
10 um	2.60905
10 um	2.60921
10 um	2.60937
10 um	2.60952
10 um	2.60968
10 um	2.60984
10 um	2.61
10 um	2.61016
10 um	2.61032
10 um	2.61048
10 um	2.61064
10 um	2.6108
10 um	2.61096
10 um	2.61111
10 um	2.61127
10 um	2.61143
10 um	2.61159
10 um	2.61175
10 um	2.61191
10 um	2.61207
10 um	2.61223
10 um	2.61239
10 um	2.61254
10 um	2.6127
10 um	2.61286
10 um	2.61302
10 um	2.61318
10 um	2.61334
10 um	2.6135
10 um	2.61366
10 um	2.61382
10 um	2.61398
10 um	2.61413
10 um	2.61429
10 um	2.61445
10 um	2.61461
10 um	2.61477
10 um	2.61493
10 um	2.61509
10 um	2.61525
10 um	2.61541
10 um	2.61556
10 um	2.61572
10 um	2.61588
10 um	2.61604
10 um	2.6162
10 um	2.61636
10 um	2.61652
10 um	2.61668
10 um	2.61684
10 um	2.617
10 um	2.61715
10 um	2.61731
10 um	2.61747
10 um	2.61763
10 um	2.61779
10 um	2.61795
10 um	2.61811
10 um	2.61827
10 um	2.61843
10 um	2.61859
10 um	2.61874
10 um	2.6189
10 um	2.61906
10 um	2.61922
10 um	2.61938
10 um	2.61954
10 um	2.6197
10 um	2.61986
10 um	2.62002
10 um	2.62017
10 um	2.62033
10 um	2.62049
10 um	2.62065
10 um	2.62081
10 um	2.62097
10 um	2.62113
10 um	2.62129
10 um	2.62145
10 um	2.62161
10 um	2.62176
10 um	2.62192
10 um	2.62208
10 um	2.62224
10 um	2.6224
10 um	2.62256
10 um	2.62272
10 um	2.62288
10 um	2.62304
10 um	2.6232
10 um	2.62335
10 um	2.62351
10 um	2.62367
10 um	2.62383
10 um	2.62399
10 um	2.62415
10 um	2.62431
10 um	2.62447
10 um	2.62463
10 um	2.62478
10 um	2.62494
10 um	2.6251
10 um	2.62526
10 um	2.62542
10 um	2.62558
10 um	2.62574
10 um	2.6259
10 um	2.62606
10 um	2.62622
10 um	2.62637
10 um	2.62653
10 um	2.62669
10 um	2.62685
10 um	2.62701
10 um	2.62717
10 um	2.62733
10 um	2.62749
10 um	2.62765
10 um	2.62781
10 um	2.62796
10 um	2.62812
10 um	2.62828
10 um	2.62844
10 um	2.6286
10 um	2.62876
10 um	2.62892
10 um	2.62908
10 um	2.62924
10 um	2.62939
10 um	2.62955
10 um	2.62971
10 um	2.62987
10 um	2.63003
10 um	2.63019
10 um	2.63035
10 um	2.63051
10 um	2.63067
10 um	2.63083
10 um	2.63098
10 um	2.63114
10 um	2.6313
10 um	2.63146
10 um	2.63162
10 um	2.63178
10 um	2.63194
10 um	2.6321
10 um	2.63226
10 um	2.63241
10 um	2.63257
10 um	2.63273
10 um	2.63289
10 um	2.63305
10 um	2.63321
10 um	2.63337
10 um	2.63353
10 um	2.63369
10 um	2.63385
10 um	2.634
10 um	2.63416
10 um	2.63432
10 um	2.63448
10 um	2.63464
10 um	2.6348
10 um	2.63496
10 um	2.63512
10 um	2.63528
10 um	2.63544
10 um	2.63559
10 um	2.63575
10 um	2.63591
10 um	2.63607
10 um	2.63623
10 um	2.63639
10 um	2.63655
10 um	2.63671
10 um	2.63687
10 um	2.63702
10 um	2.63718
10 um	2.63734
10 um	2.6375
10 um	2.63766
10 um	2.63782
10 um	2.63798
10 um	2.63814
10 um	2.6383
10 um	2.63846
10 um	2.63861
10 um	2.63877
10 um	2.63893
10 um	2.63909
10 um	2.63925
10 um	2.63941
10 um	2.63957
10 um	2.63973
10 um	2.63989
10 um	2.64005
10 um	2.6402
10 um	2.64036
10 um	2.64052
10 um	2.64068
10 um	2.64084
10 um	2.641
10 um	2.64116
10 um	2.64132
10 um	2.64148
10 um	2.64163
10 um	2.64179
10 um	2.64195
10 um	2.64211
10 um	2.64227
10 um	2.64243
10 um	2.64259
10 um	2.64275
10 um	2.64291
10 um	2.64307
10 um	2.64322
10 um	2.64338
10 um	2.64354
10 um	2.6437
10 um	2.64386
10 um	2.64402
10 um	2.64418
10 um	2.64434
10 um	2.6445
10 um	2.64465
10 um	2.64481
10 um	2.64497
10 um	2.64513
10 um	2.64529
10 um	2.64545
10 um	2.64561
10 um	2.64577
10 um	2.64593
10 um	2.64609
10 um	2.64624
10 um	2.6464
10 um	2.64656
10 um	2.64672
10 um	2.64688
10 um	2.64704
10 um	2.6472
10 um	2.64736
10 um	2.64752
10 um	2.64768
10 um	2.64783
10 um	2.64799
10 um	2.64815
10 um	2.64831
10 um	2.64847
10 um	2.64863
10 um	2.64879
10 um	2.64895
10 um	2.64911
10 um	2.64926
10 um	2.64942
10 um	2.64958
10 um	2.64974
10 um	2.6499
10 um	2.65006
10 um	2.65022
10 um	2.65038
10 um	2.65054
10 um	2.6507
10 um	2.65085
10 um	2.65101
10 um	2.65117
10 um	2.65133
10 um	2.65149
10 um	2.65165
10 um	2.65181
10 um	2.65197
10 um	2.65213
10 um	2.65229
10 um	2.65244
10 um	2.6526
10 um	2.65276
10 um	2.65292
10 um	2.65308
10 um	2.65324
10 um	2.6534
10 um	2.65356
10 um	2.65372
10 um	2.65387
10 um	2.65403
10 um	2.65419
10 um	2.65435
10 um	2.65451
10 um	2.65467
10 um	2.65483
10 um	2.65499
10 um	2.65515
10 um	2.65531
10 um	2.65546
10 um	2.65562
10 um	2.65578
10 um	2.65594
10 um	2.6561
10 um	2.65626
10 um	2.65642
10 um	2.65658
10 um	2.65674
10 um	2.65689
10 um	2.65705
10 um	2.65721
10 um	2.65737
10 um	2.65753
10 um	2.65769
10 um	2.65785
10 um	2.65801
10 um	2.65817
10 um	2.65833
10 um	2.65848
10 um	2.65864
10 um	2.6588
10 um	2.65896
10 um	2.65912
10 um	2.65928
10 um	2.65944
10 um	2.6596
10 um	2.65976
10 um	2.65992
10 um	2.66007
10 um	2.66023
10 um	2.66039
10 um	2.66055
10 um	2.66071
10 um	2.66087
10 um	2.66103
10 um	2.66119
10 um	2.66135
10 um	2.6615
10 um	2.66166
10 um	2.66182
10 um	2.66198
10 um	2.66214
10 um	2.6623
10 um	2.66246
10 um	2.66262
10 um	2.66278
10 um	2.66294
10 um	2.66309
10 um	2.66325
10 um	2.66341
10 um	2.66357
10 um	2.66373
10 um	2.66389
10 um	2.66405
10 um	2.66421
10 um	2.66437
10 um	2.66453
10 um	2.66468
10 um	2.66484
10 um	2.665
10 um	2.66516
10 um	2.66532
10 um	2.66548
10 um	2.66564
10 um	2.6658
10 um	2.66596
10 um	2.66611
10 um	2.66627
10 um	2.66643
10 um	2.66659
10 um	2.66675
10 um	2.66691
10 um	2.66707
10 um	2.66723
10 um	2.66739
10 um	2.66755
10 um	2.6677
10 um	2.66786
10 um	2.66802
10 um	2.66818
10 um	2.66834
10 um	2.6685
10 um	2.66866
10 um	2.66882
10 um	2.66898
10 um	2.66913
10 um	2.66929
10 um	2.66945
10 um	2.66961
10 um	2.66977
10 um	2.66993
10 um	2.67009
10 um	2.67025
10 um	2.67041
10 um	2.67057
10 um	2.67072
10 um	2.67088
10 um	2.67104
10 um	2.6712
10 um	2.67136
10 um	2.67152
10 um	2.67168
10 um	2.67184
10 um	2.672
10 um	2.67216
10 um	2.67231
10 um	2.67247
10 um	2.67263
10 um	2.67279
10 um	2.67295
10 um	2.67311
10 um	2.67327
10 um	2.67343
10 um	2.67359
10 um	2.67374
10 um	2.6739
10 um	2.67406
10 um	2.67422
10 um	2.67438
10 um	2.67454
10 um	2.6747
10 um	2.67486
10 um	2.67502
10 um	2.67518
10 um	2.67533
10 um	2.67549
10 um	2.67565
10 um	2.67581
10 um	2.67597
10 um	2.67613
10 um	2.67629
10 um	2.67645
10 um	2.67661
10 um	2.67677
10 um	2.67692
10 um	2.67708
10 um	2.67724
10 um	2.6774
10 um	2.67756
10 um	2.67772
10 um	2.67788
10 um	2.67804
10 um	2.6782
10 um	2.67835
10 um	2.67851
10 um	2.67867
10 um	2.67883
10 um	2.67899
10 um	2.67915
10 um	2.67931
10 um	2.67947
10 um	2.67963
10 um	2.67979
10 um	2.67994
10 um	2.6801
10 um	2.68026
10 um	2.68042
10 um	2.68058
10 um	2.68074
10 um	2.6809
10 um	2.68106
10 um	2.68122
10 um	2.68138
10 um	2.68153
10 um	2.68169
10 um	2.68185
10 um	2.68201
10 um	2.68217
10 um	2.68233
10 um	2.68249
10 um	2.68265
10 um	2.68281
10 um	2.68296
10 um	2.68312
10 um	2.68328
10 um	2.68344
10 um	2.6836
10 um	2.68376
10 um	2.68392
10 um	2.68408
10 um	2.68424
10 um	2.6844
10 um	2.68455
10 um	2.68471
10 um	2.68487
10 um	2.68503
10 um	2.68519
10 um	2.68535
10 um	2.68551
10 um	2.68567
10 um	2.68583
10 um	2.68598
10 um	2.68614
10 um	2.6863
10 um	2.68646
10 um	2.68662
10 um	2.68678
10 um	2.68694
10 um	2.6871
10 um	2.68726
10 um	2.68742
10 um	2.68757
10 um	2.68773
10 um	2.68789
10 um	2.68805
10 um	2.68821
10 um	2.68837
10 um	2.68853
10 um	2.68869
10 um	2.68885
10 um	2.68901
10 um	2.68916
10 um	2.68932
10 um	2.68948
10 um	2.68964
10 um	2.6898
10 um	2.68996
10 um	2.69012
10 um	2.69028
10 um	2.69044
10 um	2.69059
10 um	2.69075
10 um	2.69091
10 um	2.69107
10 um	2.69123
10 um	2.69139
10 um	2.69155
10 um	2.69171
10 um	2.69187
10 um	2.69203
10 um	2.69218
10 um	2.69234
10 um	2.6925
10 um	2.69266
10 um	2.69282
10 um	2.69298
10 um	2.69314
10 um	2.6933
10 um	2.69346
10 um	2.69362
10 um	2.69377
10 um	2.69393
10 um	2.69409
10 um	2.69425
10 um	2.69441
10 um	2.69457
10 um	2.69473
10 um	2.69489
10 um	2.69505
10 um	2.6952
10 um	2.69536
10 um	2.69552
10 um	2.69568
10 um	2.69584
10 um	2.696
10 um	2.69616
10 um	2.69632
10 um	2.69648
10 um	2.69664
10 um	2.69679
10 um	2.69695
10 um	2.69711
10 um	2.69727
10 um	2.69743
10 um	2.69759
10 um	2.69775
10 um	2.69791
10 um	2.69807
10 um	2.69822
10 um	2.69838
10 um	2.69854
10 um	2.6987
10 um	2.69886
10 um	2.69902
10 um	2.69918
10 um	2.69934
10 um	2.6995
10 um	2.69966
10 um	2.69981
10 um	2.69997
10 um	2.70013
10 um	2.70029
10 um	2.70045
10 um	2.70061
10 um	2.70077
10 um	2.70093
10 um	2.70109
10 um	2.70125
10 um	2.7014
10 um	2.70156
10 um	2.70172
10 um	2.70188
10 um	2.70204
10 um	2.7022
10 um	2.70236
10 um	2.70252
10 um	2.70268
10 um	2.70283
10 um	2.70299
10 um	2.70315
10 um	2.70331
10 um	2.70347
10 um	2.70363
10 um	2.70379
10 um	2.70395
10 um	2.70411
10 um	2.70427
10 um	2.70442
10 um	2.70458
10 um	2.70474
10 um	2.7049
10 um	2.70506
10 um	2.70522
10 um	2.70538
10 um	2.70554
10 um	2.7057
10 um	2.70586
10 um	2.70601
10 um	2.70617
10 um	2.70633
10 um	2.70649
10 um	2.70665
10 um	2.70681
10 um	2.70697
10 um	2.70713
10 um	2.70729
10 um	2.70744
10 um	2.7076
10 um	2.70776
10 um	2.70792
10 um	2.70808
10 um	2.70824
10 um	2.7084
10 um	2.70856
10 um	2.70872
10 um	2.70888
10 um	2.70903
10 um	2.70919
10 um	2.70935
10 um	2.70951
10 um	2.70967
10 um	2.70983
10 um	2.70999
10 um	2.71015
10 um	2.71031
10 um	2.71046
10 um	2.71062
10 um	2.71078
10 um	2.71094
10 um	2.7111
10 um	2.71126
10 um	2.71142
10 um	2.71158
10 um	2.71174
10 um	2.7119
10 um	2.71205
10 um	2.71221
10 um	2.71237
10 um	2.71253
10 um	2.71269
10 um	2.71285
10 um	2.71301
10 um	2.71317
10 um	2.71333
10 um	2.71349
10 um	2.71364
10 um	2.7138
10 um	2.71396
10 um	2.71412
10 um	2.71428
10 um	2.71444
10 um	2.7146
10 um	2.71476
10 um	2.71492
10 um	2.71507
10 um	2.71523
10 um	2.71539
10 um	2.71555
10 um	2.71571
10 um	2.71587
10 um	2.71603
10 um	2.71619
10 um	2.71635
10 um	2.71651
10 um	2.71666
10 um	2.71682
10 um	2.71698
10 um	2.71714
10 um	2.7173
10 um	2.71746
10 um	2.71762
10 um	2.71778
10 um	2.71794
10 um	2.7181
10 um	2.71825
10 um	2.71841
10 um	2.71857
10 um	2.71873
10 um	2.71889
10 um	2.71905
10 um	2.71921
10 um	2.71937
10 um	2.71953
10 um	2.71968
10 um	2.71984
10 um	2.72
10 um	2.72016
10 um	2.72032
10 um	2.72048
10 um	2.72064
10 um	2.7208
10 um	2.72096
10 um	2.72112
10 um	2.72127
10 um	2.72143
10 um	2.72159
10 um	2.72175
10 um	2.72191
10 um	2.72207
10 um	2.72223
10 um	2.72239
10 um	2.72255
10 um	2.7227
10 um	2.72286
10 um	2.72302
10 um	2.72318
10 um	2.72334
10 um	2.7235
10 um	2.72366
10 um	2.72382
10 um	2.72398
10 um	2.72414
10 um	2.72429
10 um	2.72445
10 um	2.72461
10 um	2.72477
10 um	2.72493
10 um	2.72509
10 um	2.72525
10 um	2.72541
10 um	2.72557
10 um	2.72573
10 um	2.72588
10 um	2.72604
10 um	2.7262
10 um	2.72636
10 um	2.72652
10 um	2.72668
10 um	2.72684
10 um	2.727
10 um	2.72716
10 um	2.72731
10 um	2.72747
10 um	2.72763
10 um	2.72779
10 um	2.72795
10 um	2.72811
10 um	2.72827
10 um	2.72843
10 um	2.72859
10 um	2.72875
10 um	2.7289
10 um	2.72906
10 um	2.72922
10 um	2.72938
10 um	2.72954
10 um	2.7297
10 um	2.72986
10 um	2.73002
10 um	2.73018
10 um	2.73034
10 um	2.73049
10 um	2.73065
10 um	2.73081
10 um	2.73097
10 um	2.73113
10 um	2.73129
10 um	2.73145
10 um	2.73161
10 um	2.73177
10 um	2.73192
10 um	2.73208
10 um	2.73224
10 um	2.7324
10 um	2.73256
10 um	2.73272
10 um	2.73288
10 um	2.73304
10 um	2.7332
10 um	2.73336
10 um	2.73351
10 um	2.73367
10 um	2.73383
10 um	2.73399
10 um	2.73415
10 um	2.73431
10 um	2.73447
10 um	2.73463
10 um	2.73479
10 um	2.73495
10 um	2.7351
10 um	2.73526
10 um	2.73542
10 um	2.73558
10 um	2.73574
10 um	2.7359
10 um	2.73606
10 um	2.73622
10 um	2.73638
10 um	2.73653
10 um	2.73669
10 um	2.73685
10 um	2.73701
10 um	2.73717
10 um	2.73733
10 um	2.73749
10 um	2.73765
10 um	2.73781
10 um	2.73797
10 um	2.73812
10 um	2.73828
10 um	2.73844
10 um	2.7386
10 um	2.73876
10 um	2.73892
10 um	2.73908
10 um	2.73924
10 um	2.7394
10 um	2.73955
10 um	2.73971
10 um	2.73987
10 um	2.74003
10 um	2.74019
10 um	2.74035
10 um	2.74051
10 um	2.74067
10 um	2.74083
10 um	2.74099
10 um	2.74114
10 um	2.7413
10 um	2.74146
10 um	2.74162
10 um	2.74178
10 um	2.74194
10 um	2.7421
10 um	2.74226
10 um	2.74242
10 um	2.74258
10 um	2.74273
10 um	2.74289
10 um	2.74305
10 um	2.74321
10 um	2.74337
10 um	2.74353
10 um	2.74369
10 um	2.74385
10 um	2.74401
10 um	2.74416
10 um	2.74432
10 um	2.74448
10 um	2.74464
10 um	2.7448
10 um	2.74496
10 um	2.74512
10 um	2.74528
10 um	2.74544
10 um	2.7456
10 um	2.74575
10 um	2.74591
10 um	2.74607
10 um	2.74623
10 um	2.74639
10 um	2.74655
10 um	2.74671
10 um	2.74687
10 um	2.74703
10 um	2.74719
10 um	2.74734
10 um	2.7475
10 um	2.74766
10 um	2.74782
10 um	2.74798
10 um	2.74814
10 um	2.7483
10 um	2.74846
10 um	2.74862
10 um	2.74877
10 um	2.74893
10 um	2.74909
10 um	2.74925
10 um	2.74941
10 um	2.74957
10 um	2.74973
10 um	2.74989
10 um	2.75005
10 um	2.75021
10 um	2.75036
10 um	2.75052
10 um	2.75068
10 um	2.75084
10 um	2.751
10 um	2.75116
10 um	2.75132
10 um	2.75148
10 um	2.75164
10 um	2.75179
10 um	2.75195
10 um	2.75211
10 um	2.75227
10 um	2.75243
10 um	2.75259
10 um	2.75275
10 um	2.75291
10 um	2.75307
10 um	2.75323
10 um	2.75338
10 um	2.75354
10 um	2.7537
10 um	2.75386
10 um	2.75402
10 um	2.75418
10 um	2.75434
10 um	2.7545
10 um	2.75466
10 um	2.75482
10 um	2.75497
10 um	2.75513
10 um	2.75529
10 um	2.75545
10 um	2.75561
10 um	2.75577
10 um	2.75593
10 um	2.75609
10 um	2.75625
10 um	2.7564
10 um	2.75656
10 um	2.75672
10 um	2.75688
10 um	2.75704
10 um	2.7572
10 um	2.75736
10 um	2.75752
10 um	2.75768
10 um	2.75784
10 um	2.75799
10 um	2.75815
10 um	2.75831
10 um	2.75847
10 um	2.75863
10 um	2.75879
10 um	2.75895
10 um	2.75911
10 um	2.75927
10 um	2.75943
10 um	2.75958
10 um	2.75974
10 um	2.7599
10 um	2.76006
10 um	2.76022
10 um	2.76038
10 um	2.76054
10 um	2.7607
10 um	2.76086
10 um	2.76101
10 um	2.76117
10 um	2.76133
10 um	2.76149
10 um	2.76165
10 um	2.76181
10 um	2.76197
10 um	2.76213
10 um	2.76229
10 um	2.76245
10 um	2.7626
10 um	2.76276
10 um	2.76292
10 um	2.76308
10 um	2.76324
10 um	2.7634
10 um	2.76356
10 um	2.76372
10 um	2.76388
10 um	2.76403
10 um	2.76419
10 um	2.76435
10 um	2.76451
10 um	2.76467
10 um	2.76483
10 um	2.76499
10 um	2.76515
10 um	2.76531
10 um	2.76547
10 um	2.76562
10 um	2.76578
10 um	2.76594
10 um	2.7661
10 um	2.76626
10 um	2.76642
10 um	2.76658
10 um	2.76674
10 um	2.7669
10 um	2.76706
10 um	2.76721
10 um	2.76737
10 um	2.76753
10 um	2.76769
10 um	2.76785
10 um	2.76801
10 um	2.76817
10 um	2.76833
10 um	2.76849
10 um	2.76864
10 um	2.7688
10 um	2.76896
10 um	2.76912
10 um	2.76928
10 um	2.76944
10 um	2.7696
10 um	2.76976
10 um	2.76992
10 um	2.77008
10 um	2.77023
10 um	2.77039
10 um	2.77055
10 um	2.77071
10 um	2.77087
10 um	2.77103
10 um	2.77119
10 um	2.77135
10 um	2.77151
10 um	2.77167
10 um	2.77182
10 um	2.77198
10 um	2.77214
10 um	2.7723
10 um	2.77246
10 um	2.77262
10 um	2.77278
10 um	2.77294
10 um	2.7731
10 um	2.77325
10 um	2.77341
10 um	2.77357
10 um	2.77373
10 um	2.77389
10 um	2.77405
10 um	2.77421
10 um	2.77437
10 um	2.77453
10 um	2.77469
10 um	2.77484
10 um	2.775
10 um	2.77516
10 um	2.77532
10 um	2.77548
10 um	2.77564
10 um	2.7758
10 um	2.77596
10 um	2.77612
10 um	2.77628
10 um	2.77643
10 um	2.77659
10 um	2.77675
10 um	2.77691
10 um	2.77707
10 um	2.77723
10 um	2.77739
10 um	2.77755
10 um	2.77771
10 um	2.77786
10 um	2.77802
10 um	2.77818
10 um	2.77834
10 um	2.7785
10 um	2.77866
10 um	2.77882
10 um	2.77898
10 um	2.77914
10 um	2.7793
10 um	2.77945
10 um	2.77961
10 um	2.77977
10 um	2.77993
10 um	2.78009
10 um	2.78025
10 um	2.78041
10 um	2.78057
10 um	2.78073
10 um	2.78088
10 um	2.78104
10 um	2.7812
10 um	2.78136
10 um	2.78152
10 um	2.78168
10 um	2.78184
10 um	2.782
10 um	2.78216
10 um	2.78232
10 um	2.78247
10 um	2.78263
10 um	2.78279
10 um	2.78295
10 um	2.78311
10 um	2.78327
10 um	2.78343
10 um	2.78359
10 um	2.78375
10 um	2.78391
10 um	2.78406
10 um	2.78422
10 um	2.78438
10 um	2.78454
10 um	2.7847
10 um	2.78486
10 um	2.78502
10 um	2.78518
10 um	2.78534
10 um	2.78549
10 um	2.78565
10 um	2.78581
10 um	2.78597
10 um	2.78613
10 um	2.78629
10 um	2.78645
10 um	2.78661
10 um	2.78677
10 um	2.78693
10 um	2.78708
10 um	2.78724
10 um	2.7874
10 um	2.78756
10 um	2.78772
10 um	2.78788
10 um	2.78804
10 um	2.7882
10 um	2.78836
10 um	2.78852
10 um	2.78867
10 um	2.78883
10 um	2.78899
10 um	2.78915
10 um	2.78931
10 um	2.78947
10 um	2.78963
10 um	2.78979
10 um	2.78995
10 um	2.7901
10 um	2.79026
10 um	2.79042
10 um	2.79058
10 um	2.79074
10 um	2.7909
10 um	2.79106
10 um	2.79122
10 um	2.79138
10 um	2.79154
10 um	2.79169
10 um	2.79185
10 um	2.79201
10 um	2.79217
10 um	2.79233
10 um	2.79249
10 um	2.79265
10 um	2.79281
10 um	2.79297
10 um	2.79312
10 um	2.79328
10 um	2.79344
10 um	2.7936
10 um	2.79376
10 um	2.79392
10 um	2.79408
10 um	2.79424
10 um	2.7944
10 um	2.79456
10 um	2.79471
10 um	2.79487
10 um	2.79503
10 um	2.79519
10 um	2.79535
10 um	2.79551
10 um	2.79567
10 um	2.79583
10 um	2.79599
10 um	2.79615
10 um	2.7963
10 um	2.79646
10 um	2.79662
10 um	2.79678
10 um	2.79694
10 um	2.7971
10 um	2.79726
10 um	2.79742
10 um	2.79758
10 um	2.79773
10 um	2.79789
10 um	2.79805
10 um	2.79821
10 um	2.79837
10 um	2.79853
10 um	2.79869
10 um	2.79885
10 um	2.79901
10 um	2.79917
10 um	2.79932
10 um	2.79948
10 um	2.79964
10 um	2.7998
10 um	2.79996
10 um	2.80012
10 um	2.80028
10 um	2.80044
10 um	2.8006
10 um	2.80076
10 um	2.80091
10 um	2.80107
10 um	2.80123
10 um	2.80139
10 um	2.80155
10 um	2.80171
10 um	2.80187
10 um	2.80203
10 um	2.80219
10 um	2.80234
10 um	2.8025
10 um	2.80266
10 um	2.80282
10 um	2.80298
10 um	2.80314
10 um	2.8033
10 um	2.80346
10 um	2.80362
10 um	2.80378
10 um	2.80393
10 um	2.80409
10 um	2.80425
10 um	2.80441
10 um	2.80457
10 um	2.80473
10 um	2.80489
10 um	2.80505
10 um	2.80521
10 um	2.80536
10 um	2.80552
10 um	2.80568
10 um	2.80584
10 um	2.806
10 um	2.80616
10 um	2.80632
10 um	2.80648
10 um	2.80664
10 um	2.8068
10 um	2.80695
10 um	2.80711
10 um	2.80727
10 um	2.80743
10 um	2.80759
10 um	2.80775
10 um	2.80791
10 um	2.80807
10 um	2.80823
10 um	2.80839
10 um	2.80854
10 um	2.8087
10 um	2.80886
10 um	2.80902
10 um	2.80918
10 um	2.80934
10 um	2.8095
10 um	2.80966
10 um	2.80982
10 um	2.80997
10 um	2.81013
10 um	2.81029
10 um	2.81045
10 um	2.81061
10 um	2.81077
10 um	2.81093
10 um	2.81109
10 um	2.81125
10 um	2.81141
10 um	2.81156
10 um	2.81172
10 um	2.81188
10 um	2.81204
10 um	2.8122
10 um	2.81236
10 um	2.81252
10 um	2.81268
10 um	2.81284
10 um	2.813
10 um	2.81315
10 um	2.81331
10 um	2.81347
10 um	2.81363
10 um	2.81379
10 um	2.81395
10 um	2.81411
10 um	2.81427
10 um	2.81443
10 um	2.81458
10 um	2.81474
10 um	2.8149
10 um	2.81506
10 um	2.81522
10 um	2.81538
10 um	2.81554
10 um	2.8157
10 um	2.81586
10 um	2.81602
10 um	2.81617
10 um	2.81633
10 um	2.81649
10 um	2.81665
10 um	2.81681
10 um	2.81697
10 um	2.81713
10 um	2.81729
10 um	2.81745
10 um	2.8176
[truncated: 13,480 more rows]

## Sheet: panel c
RNA molecule number / fov	Tissue Depth
9611	10 um
7238	190 um

## Sheet: panel d
Tissue Depth	log10(integrated photon counts)
10 um	2.51063
10 um	3.6226
10 um	2.58852
10 um	2.33802
10 um	2.85316
10 um	2.87672
10 um	2.9819
10 um	2.46587
10 um	3.055
10 um	3.4173
10 um	2.61918
10 um	3.54029
10 um	3.41357
10 um	2.14874
10 um	2.05146
10 um	3.9589
10 um	4.08972
10 um	2.68975
10 um	2.83544
10 um	2.53472
10 um	4.13531
10 um	4.04393
10 um	2.42413
10 um	2.74653
10 um	3.7121
10 um	3.81592
10 um	2.22243
10 um	3.08039
10 um	3.6471
10 um	2.88766
10 um	2.29052
10 um	2.84107
10 um	2.09115
10 um	3.59023
10 um	3.38091
10 um	2.5919
10 um	3.27549
10 um	2.33628
10 um	2.48739
10 um	2.7025
10 um	3.7042
10 um	2.27445
10 um	2.80949
10 um	2.85132
10 um	3.10378
10 um	3.53593
10 um	3.26303
10 um	2.86492
10 um	3.10996
10 um	2.2322
10 um	3.44308
10 um	2.83691
10 um	3.13261
10 um	3.02376
10 um	2.55346
10 um	4.37337
10 um	3.27289
10 um	3.23088
10 um	2.30864
10 um	2.72348
10 um	3.37534
10 um	2.03012
10 um	2.69838
10 um	3.89516
10 um	2.98949
10 um	3.36657
10 um	3.60835
10 um	2.34754
10 um	2.89734
10 um	2.85738
10 um	2.98861
10 um	2.88112
10 um	3.30376
10 um	2.26821
10 um	3.24048
10 um	2.73537
10 um	2.15337
10 um	3.51652
10 um	3.51667
10 um	2.43076
10 um	2.47326
10 um	2.35094
10 um	2.76003
10 um	3.23721
10 um	2.76196
10 um	2.51292
10 um	2.77901
10 um	3.43554
10 um	2.5202
10 um	3.13108
10 um	2.83229
10 um	3.56603
10 um	3.07665
10 um	2.17145
10 um	2.86377
10 um	2.35882
10 um	2.66731
10 um	2.27651
10 um	2.7487
10 um	2.81676
10 um	3.20057
10 um	2.80084
10 um	2.0187
10 um	3.84366
10 um	2.11484
10 um	3.51428
10 um	3.62631
10 um	2.24304
10 um	2.75938
10 um	2.85873
10 um	3.19955
10 um	3.40132
10 um	2.81893
10 um	2.9322
10 um	2.34091
10 um	2.88318
10 um	2.19991
10 um	3.49841
10 um	2.83735
10 um	2.3824
10 um	3.67138
10 um	3.49414
10 um	3.68617
10 um	3.31856
10 um	3.06813
10 um	3.87762
10 um	3.12752
10 um	3.18472
10 um	3.43446
10 um	3.29918
10 um	3.38273
10 um	3.65875
10 um	2.80444
10 um	3.05902
10 um	3.71808
10 um	3.25818
10 um	3.6888
10 um	2.8393
10 um	3.43707
10 um	3.69136
10 um	3.70251
10 um	3.12417
10 um	2.61202
10 um	3.375
10 um	3.38852
10 um	2.4414
10 um	2.37219
10 um	2.47088
10 um	3.36415
10 um	3.223
10 um	2.30979
10 um	3.76049
10 um	2.13308
10 um	3.17694
10 um	3.55364
10 um	2.7823
10 um	2.74545
10 um	4.12798
10 um	3.83629
10 um	2.61378
10 um	3.25249
10 um	4.26741
10 um	2.87965
10 um	3.18741
10 um	2.94546
10 um	3.06636
10 um	3.14361
10 um	3.15107
10 um	3.3745
10 um	3.3314
10 um	3.33511
10 um	3.40962
10 um	2.13749
10 um	3.89165
10 um	3.47443
10 um	2.8675
10 um	3.98109
10 um	3.21816
10 um	2.57912
10 um	3.44876
10 um	3.46164
10 um	3.73958
10 um	2.66117
10 um	3.90705
10 um	3.79565
10 um	3.62421
10 um	2.58611
10 um	2.10076
10 um	2.31803
10 um	2.35333
10 um	3.21273
10 um	4.1214
10 um	3.58729
10 um	2.48666
10 um	2.47773
10 um	3.78916
10 um	2.80447
10 um	2.36365
10 um	2.4126
10 um	3.07834
10 um	2.70545
10 um	2.70724
10 um	3.00568
10 um	3.13747
10 um	3.44541
10 um	2.41212
10 um	3.18624
10 um	2.60952
10 um	2.78998
10 um	3.69296
10 um	2.81755
10 um	3.7754
10 um	1.93975
10 um	3.74483
10 um	3.62112
10 um	2.10985
10 um	3.03327
10 um	2.1227
10 um	3.92844
10 um	2.56541
10 um	2.66077
10 um	2.50905
10 um	2.89065
10 um	3.63941
10 um	2.35243
10 um	2.20592
10 um	3.49755
10 um	2.80722
10 um	3.0442
10 um	2.50533
10 um	3.37738
10 um	1.95604
10 um	2.58801
10 um	2.08737
10 um	4.26419
10 um	2.87453
10 um	2.16704
10 um	4.27146
10 um	3.71711
10 um	3.7467
10 um	4.54812
10 um	3.66315
10 um	2.30624
10 um	2.22615
10 um	3.31245
10 um	3.90189
10 um	2.63831
10 um	2.39303
10 um	2.80834
10 um	3.98449
10 um	4.18081
10 um	3.149
10 um	3.62385
10 um	2.38379
10 um	3.69864
10 um	2.05271
10 um	2.3545
10 um	3.08479
10 um	2.65492
10 um	3.58609
10 um	1.9059
10 um	2.68919
10 um	3.29203
10 um	3.83565
10 um	4.12398
10 um	3.16769
10 um	2.93941
10 um	3.25556
10 um	3.25636
10 um	2.21267
10 um	3.0015
10 um	2.62185
10 um	3.26167
10 um	3.10212
10 um	3.88064
10 um	3.25711
10 um	2.60293
10 um	3.12953
10 um	3.48768
10 um	2.66924
10 um	3.8559
10 um	3.53476
10 um	3.35364
10 um	3.41818
10 um	2.75661
10 um	2.18653
10 um	2.84517
10 um	3.29895
10 um	3.48694
10 um	2.19051
10 um	2.25954
10 um	4.0374
10 um	2.37866
10 um	2.64496
10 um	2.68238
10 um	2.20703
10 um	4.0033
10 um	2.225
10 um	2.68156
10 um	2.83136
10 um	2.85276
10 um	2.96466
10 um	4.07082
10 um	2.5868
10 um	2.09747
10 um	4.28248
10 um	3.50987
10 um	3.32222
10 um	3.2256
10 um	2.90064
10 um	3.22919
10 um	4.15332
10 um	2.66258
10 um	3.57447
10 um	3.13454
10 um	3.00256
10 um	2.70755
10 um	2.26682
10 um	2.88649
10 um	2.70655
10 um	3.13274
10 um	1.95988
10 um	3.25454
10 um	3.01078
10 um	3.29566
10 um	3.36679
10 um	3.05975
10 um	3.22285
10 um	3.74622
10 um	3.80087
10 um	2.86985
10 um	4.03776
10 um	2.67945
10 um	2.52452
10 um	2.7147
10 um	3.91296
10 um	2.60434
10 um	2.54622
10 um	2.68559
10 um	3.3976
10 um	3.04588
10 um	3.07044
10 um	2.17131
10 um	3.33452
10 um	3.24371
10 um	2.55694
10 um	3.40625
10 um	2.65596
10 um	3.44395
10 um	3.29264
10 um	3.6162
10 um	3.03574
10 um	3.19495
10 um	2.90251
10 um	3.62979
10 um	3.51711
10 um	2.88472
10 um	4.14529
10 um	3.19334
10 um	3.13507
10 um	4.02343
10 um	2.54872
10 um	2.73894
10 um	3.91579
10 um	3.74226
10 um	2.74237
10 um	1.94416
10 um	2.37995
10 um	3.06695
10 um	4.05697
10 um	3.03918
10 um	2.77606
10 um	3.47832
10 um	2.87946
10 um	3.03984
10 um	3.9335
10 um	3.2586
10 um	2.76285
10 um	3.0061
10 um	2.97429
10 um	2.35467
10 um	4.1971
10 um	2.53105
10 um	3.64309
10 um	3.26142
10 um	2.52892
10 um	3.17092
10 um	3.54527
10 um	3.04525
10 um	2.28807
10 um	3.36163
10 um	2.83162
10 um	3.05339
10 um	2.07294
10 um	3.67585
10 um	2.35625
10 um	3.11743
10 um	2.01682
10 um	2.64493
10 um	3.08152
10 um	3.54243
10 um	2.52519
10 um	2.06806
10 um	2.82424
10 um	2.62364
10 um	3.68255
10 um	3.31214
10 um	3.18137
10 um	3.2709
10 um	1.93709
10 um	3.01968
10 um	2.57835
10 um	2.96018
10 um	2.07161
10 um	2.34565
10 um	3.3926
10 um	3.44569
10 um	3.05238
10 um	3.70007
10 um	4.23338
10 um	2.5777
10 um	2.89118
10 um	2.95504
10 um	3.39203
10 um	2.27208
10 um	3.65424
10 um	3.17333
10 um	2.41349
10 um	3.70144
10 um	3.09313
10 um	2.00999
10 um	2.71484
10 um	2.86902
10 um	3.23353
10 um	2.92756
10 um	3.30718
10 um	3.34698
10 um	3.3413
10 um	3.46988
10 um	3.05623
10 um	3.08177
10 um	3.80404
10 um	3.83587
10 um	2.52476
10 um	2.38282
10 um	2.62693
10 um	3.01018
10 um	3.38872
10 um	3.25272
10 um	3.45548
10 um	2.24988
10 um	2.98632
10 um	3.584
10 um	3.30904
10 um	1.91386
10 um	3.59528
10 um	3.3181
10 um	4.17936
10 um	2.51491
10 um	1.92854
10 um	2.7124
10 um	3.21817
10 um	3.40765
10 um	1.94755
10 um	2.82111
10 um	2.64868
10 um	2.36968
10 um	2.52016
10 um	3.4044
10 um	2.66749
10 um	2.85699
10 um	2.87365
10 um	3.76319
10 um	3.28585
10 um	2.99354
10 um	2.81629
10 um	2.73539
10 um	3.82932
10 um	2.02093
10 um	3.10311
10 um	3.17419
10 um	2.76635
10 um	2.77159
10 um	2.98264
10 um	2.33399
10 um	3.77683
10 um	3.06868
10 um	2.50274
10 um	3.209
10 um	2.73043
10 um	2.42977
10 um	2.47018
10 um	3.26031
10 um	3.30822
10 um	2.62034
10 um	2.9671
10 um	3.17605
10 um	3.06824
10 um	3.36409
10 um	3.55269
10 um	3.41373
10 um	2.6652
10 um	3.21798
10 um	3.53708
10 um	2.87583
10 um	3.18187
10 um	3.77809
10 um	1.93843
10 um	2.05006
10 um	3.54143
10 um	2.67458
10 um	3.84008
10 um	2.87006
10 um	2.12965
10 um	3.27372
10 um	3.59128
10 um	2.7403
10 um	3.28316
10 um	2.42639
10 um	3.96265
10 um	3.09999
10 um	4.12964
10 um	3.51122
10 um	2.65958
10 um	3.36767
10 um	2.45755
10 um	3.56203
10 um	3.30394
10 um	3.55415
10 um	3.04216
10 um	3.95657
10 um	3.96704
10 um	3.02784
10 um	3.19597
10 um	2.4971
10 um	3.47164
10 um	3.07838
10 um	2.34795
10 um	3.1989
10 um	3.67108
10 um	3.26429
10 um	3.1237
10 um	2.66942
10 um	2.95478
10 um	2.19574
10 um	3.13129
10 um	3.91824
10 um	2.31022
10 um	2.50492
10 um	2.47062
10 um	3.08215
10 um	3.82851
10 um	3.33294
10 um	3.01768
10 um	2.29918
10 um	2.04717
10 um	2.71375
10 um	3.03331
10 um	3.09367
10 um	2.40776
10 um	2.42302
10 um	2.75197
10 um	2.79349
10 um	3.56556
10 um	3.45899
10 um	2.56294
10 um	3.33161
10 um	3.38596
10 um	3.14777
10 um	3.73368
10 um	2.48496
10 um	3.23637
10 um	3.13728
10 um	2.66872
10 um	3.44973
10 um	2.55537
10 um	2.48478
10 um	4.15388
10 um	4.31328
10 um	3.9443
10 um	2.65631
10 um	2.6224
10 um	2.37296
10 um	2.59513
10 um	2.86777
10 um	2.26945
10 um	2.79356
10 um	2.38803
10 um	3.6026
10 um	3.33427
10 um	3.04128
10 um	2.54833
10 um	3.69764
10 um	3.40876
10 um	2.81696
10 um	3.67685
10 um	3.34763
10 um	3.73493
10 um	2.43979
10 um	2.78742
10 um	4.02749
10 um	3.0838
10 um	2.72541
10 um	3.4677
10 um	3.363
10 um	3.21239
10 um	2.48683
10 um	3.15621
10 um	2.2053
10 um	3.66831
10 um	3.18158
10 um	4.42038
10 um	2.87762
10 um	3.95009
10 um	2.8862
10 um	3.68052
10 um	3.52276
10 um	1.99557
10 um	3.78419
10 um	2.8407
10 um	2.86732
10 um	2.76262
10 um	2.38441
10 um	4.01421
10 um	3.82288
10 um	2.74038
10 um	2.44471
10 um	2.73876
10 um	2.93605
10 um	3.54302
10 um	2.07042
10 um	2.93898
10 um	3.29205
10 um	3.45615
10 um	3.1958
10 um	2.27987
10 um	3.56816
10 um	2.69156
10 um	2.82596
10 um	2.46631
10 um	2.91181
10 um	2.97998
10 um	2.73369
10 um	2.84157
10 um	4.10302
10 um	2.01161
10 um	4.46594
10 um	3.16811
10 um	3.10085
10 um	2.91436
10 um	3.25879
10 um	2.88431
10 um	2.34597
10 um	3.51938
10 um	2.07548
10 um	1.95704
10 um	2.37058
10 um	2.76201
10 um	2.00682
10 um	2.51268
10 um	3.4687
10 um	2.12718
10 um	3.15265
10 um	3.89014
10 um	3.28662
10 um	3.18692
10 um	2.67284
10 um	3.17728
10 um	3.06071
10 um	3.21609
10 um	3.14919
10 um	3.85948
10 um	3.11692
10 um	2.7473
10 um	2.54817
10 um	1.94729
10 um	2.32615
10 um	3.14524
10 um	2.5794
10 um	3.70533
10 um	3.30874
10 um	2.82763
10 um	2.42907
10 um	3.38247
10 um	2.38526
10 um	2.25831
10 um	2.95205
10 um	3.28262
10 um	2.87084
10 um	2.51267
10 um	3.86772
10 um	2.75463
10 um	3.19757
10 um	2.93318
10 um	3.05637
10 um	2.57325
10 um	2.91227
10 um	2.78295
10 um	2.39025
10 um	2.98717
10 um	1.93658
10 um	2.9377
10 um	2.29135
10 um	3.02455
10 um	3.22845
10 um	2.58519
10 um	4.21573
10 um	3.52375
10 um	3.41321
10 um	2.53989
10 um	3.15349
10 um	3.43464
10 um	3.33242
10 um	2.33097
10 um	3.67761
10 um	3.75665
10 um	3.33027
10 um	2.47201
10 um	4.46183
10 um	3.16712
10 um	3.3098
10 um	2.91413
10 um	3.50256
10 um	2.84262
10 um	2.23105
10 um	2.17279
10 um	4.25187
10 um	2.75409
10 um	2.49969
10 um	3.89388
10 um	2.19906
10 um	2.60574
10 um	3.36896
10 um	3.49426
10 um	2.71128
10 um	2.86327
10 um	3.6487
10 um	2.35828
10 um	4.19096
10 um	2.74654
10 um	3.18991
10 um	3.18527
10 um	2.68162
10 um	2.84511
10 um	2.1601
10 um	4.25182
10 um	3.05491
10 um	3.37795
10 um	3.434
10 um	2.1245
10 um	2.82809
10 um	3.94583
10 um	2.84683
10 um	2.70757
10 um	2.89617
10 um	3.11358
10 um	2.05723
10 um	2.353
10 um	2.13079
10 um	4.11546
10 um	3.07323
10 um	3.75981
10 um	4.3318
10 um	2.67621
10 um	2.5766
10 um	3.5336
10 um	3.18821
10 um	3.27438
10 um	3.24308
10 um	3.7638
10 um	3.4329
10 um	3.31997
10 um	2.89592
10 um	3.86507
10 um	3.91409
10 um	2.62483
10 um	2.54224
10 um	3.47419
10 um	3.07819
10 um	3.12531
10 um	2.95971
10 um	2.08695
10 um	2.18244
10 um	3.63914
10 um	2.57807
10 um	3.26197
10 um	2.71256
10 um	3.29377
10 um	2.12961
10 um	3.15346
10 um	2.86199
10 um	2.39648
10 um	3.12447
10 um	2.87367
10 um	3.69481
10 um	3.21468
10 um	3.01359
10 um	3.14205
10 um	3.09715
10 um	1.9169
10 um	3.27534
10 um	3.20191
10 um	2.91138
10 um	2.89224
10 um	2.82654
10 um	2.5771
10 um	2.87177
10 um	3.10021
10 um	2.2386
10 um	2.98826
10 um	3.32621
10 um	2.77491
10 um	3.36136
10 um	3.34355
10 um	3.28546
10 um	2.64901
10 um	4.31042
10 um	3.25726
10 um	2.40178
10 um	3.00086
10 um	3.20994
10 um	3.01835
10 um	4.03496
10 um	3.24743
10 um	3.80128
10 um	2.33637
10 um	2.05489
10 um	3.00062
10 um	2.23219
10 um	4.15842
10 um	2.33731
10 um	2.84488
10 um	3.7199
10 um	3.20111
10 um	2.96982
10 um	2.95586
10 um	2.71141
10 um	3.44429
10 um	3.1895
10 um	2.60127
10 um	2.40028
10 um	3.20114
10 um	3.18997
10 um	3.09289
10 um	3.18431
10 um	2.7041
10 um	3.21641
10 um	2.92975
10 um	3.73766
10 um	2.96725
10 um	3.56185
10 um	2.57961
10 um	3.93424
10 um	3.57469
10 um	3.12549
10 um	2.07661
10 um	3.50057
10 um	3.11541
10 um	4.30545
10 um	3.19526
10 um	4.56732
10 um	3.16352
10 um	3.12964
10 um	2.82384
10 um	2.50305
10 um	4.05012
10 um	2.00121
10 um	2.47197
10 um	3.13356
10 um	2.58441
10 um	2.9526
10 um	4.09269
10 um	3.18982
10 um	2.24462
10 um	3.38368
10 um	2.50228
10 um	2.96997
10 um	3.18545
10 um	2.37136
10 um	2.65834
10 um	2.86552
10 um	2.20507
10 um	2.8896
10 um	2.5141
10 um	3.15736
10 um	3.22912
10 um	2.99456
10 um	2.22905
10 um	4.26913
10 um	2.62377
10 um	3.09341
10 um	4.40238
10 um	3.10786
10 um	3.98951
10 um	2.59238
10 um	3.26625
10 um	2.37536
10 um	3.35896
10 um	3.68244
10 um	4.22663
10 um	3.75783
10 um	3.38569
10 um	3.99476
10 um	3.28132
10 um	3.57468
10 um	2.55279
10 um	2.71017
10 um	3.01547
10 um	2.9772
10 um	2.57368
10 um	2.59354
10 um	2.74476
10 um	2.85706
10 um	2.37576
10 um	2.90324
10 um	2.98326
10 um	3.13213
10 um	2.83976
10 um	2.7106
10 um	3.18258
10 um	2.27067
10 um	4.2434
10 um	4.08648
10 um	3.39719
10 um	3.81894
10 um	2.91202
10 um	3.36814
10 um	2.7516
10 um	2.13226
10 um	2.58077
10 um	3.13366
10 um	3.71622
10 um	3.45434
10 um	2.90246
10 um	2.79686
10 um	2.96702
10 um	3.91666
10 um	3.00636
10 um	3.2439
10 um	2.90452
10 um	2.97832
10 um	3.09544
10 um	3.09821
10 um	2.15891
10 um	3.95199
10 um	3.21583
10 um	2.82576
10 um	2.26558
10 um	2.62237
10 um	3.35
10 um	4.10814
10 um	2.84876
10 um	3.20707
10 um	3.23112
10 um	3.30226
10 um	2.03018
10 um	2.18368
10 um	2.44085
10 um	3.71522
10 um	2.53687
10 um	2.85177
10 um	3.72698
10 um	3.13698
10 um	3.51301
10 um	3.15502
10 um	2.83914
10 um	3.80766
10 um	2.76244
10 um	2.51673
10 um	2.63806
10 um	3.51883
10 um	2.33768
10 um	2.94931
10 um	2.99307
10 um	2.47317
10 um	3.67047
10 um	3.23859
10 um	2.28769
10 um	3.19582
10 um	1.91359
10 um	3.03171
10 um	3.00385
10 um	2.87019
10 um	3.93951
10 um	2.92927
10 um	2.70804
10 um	4.02346
10 um	2.70633
10 um	2.74171
10 um	3.73939
10 um	3.30328
10 um	2.81283
10 um	2.80296
10 um	2.63103
10 um	3.24343
10 um	3.07467
10 um	3.93256
10 um	3.66593
10 um	3.484
10 um	3.52477
10 um	3.00476
10 um	3.66841
10 um	3.3622
10 um	2.71145
10 um	3.70288
10 um	3.59057
10 um	4.03404
10 um	3.02377
10 um	3.64956
10 um	2.5995
10 um	3.82359
10 um	3.03287
10 um	2.88568
10 um	2.86483
10 um	2.69915
10 um	3.512
10 um	3.4836
10 um	2.46422
10 um	3.49505
10 um	2.59929
10 um	3.67134
10 um	2.84051
10 um	2.07405
10 um	3.1313
10 um	3.39658
10 um	3.56851
10 um	3.99212
10 um	3.52643
10 um	3.51516
10 um	3.83186
10 um	4.01249
10 um	2.86243
10 um	3.52183
10 um	4.05016
10 um	2.16029
10 um	4.00382
10 um	3.59237
10 um	4.10681
10 um	2.94879
10 um	2.84781
10 um	4.53482
10 um	2.35022
10 um	2.45656
10 um	3.32937
10 um	3.62145
10 um	2.96437
10 um	3.82734
10 um	3.3458
10 um	3.28617
10 um	3.10014
10 um	3.09109
10 um	3.29902
10 um	2.47363
10 um	3.09179
10 um	3.21791
10 um	2.76403
10 um	3.92318
10 um	4.06208
10 um	3.26324
10 um	3.49104
10 um	2.10502
10 um	3.0278
10 um	2.74702
10 um	2.37634
10 um	3.47296
10 um	2.56821
10 um	3.90178
10 um	3.26767
10 um	3.95892
10 um	4.18375
10 um	3.20864
10 um	2.57732
10 um	3.86153
10 um	3.22384
10 um	2.75743
10 um	3.77021
10 um	2.78542
10 um	4.17008
10 um	3.85884
10 um	2.69281
10 um	4.0069
10 um	3.26932
10 um	2.71172
10 um	2.56991
10 um	2.82886
10 um	2.47623
10 um	3.6327
10 um	2.57172
10 um	3.26667
10 um	3.38577
10 um	3.01711
10 um	2.08805
10 um	2.79136
10 um	3.5786
10 um	3.22115
10 um	2.08703
10 um	2.96453
10 um	2.42304
10 um	3.98638
10 um	2.31471
10 um	3.04485
10 um	4.25722
10 um	3.29321
10 um	4.04495
10 um	3.09879
10 um	3.17188
10 um	2.73198
10 um	1.98855
10 um	2.12686
10 um	3.16378
10 um	4.34767
10 um	3.31174
10 um	4.16866
10 um	3.21572
10 um	3.54636
10 um	3.06629
10 um	3.08555
10 um	2.42756
10 um	2.18266
10 um	3.4753
10 um	2.93294
10 um	2.43956
10 um	1.9477
10 um	2.50804
10 um	3.55286
10 um	2.28973
10 um	4.0032
10 um	3.59085
10 um	2.88872
10 um	3.15212
10 um	2.59167
10 um	2.6561
10 um	3.82235
10 um	2.78114
10 um	2.69207
10 um	2.68514
10 um	3.11634
10 um	2.95894
10 um	2.78034
10 um	2.87247
10 um	2.79039
10 um	2.29467
10 um	3.95965
10 um	2.78476
10 um	2.5174
10 um	4.19511
10 um	2.4724
10 um	2.54392
10 um	2.49967
10 um	3.22675
10 um	3.75409
10 um	3.19644
10 um	3.32615
10 um	3.48818
10 um	2.37141
10 um	3.00432
10 um	3.52963
10 um	2.13291
10 um	2.40938
10 um	3.21752
10 um	2.87343
10 um	2.49821
10 um	3.82101
10 um	3.05597
10 um	3.7096
10 um	3.6587
10 um	2.765
10 um	3.94135
10 um	3.26308
10 um	2.93816
10 um	3.51578
10 um	3.80325
10 um	3.39445
10 um	2.58635
10 um	2.40978
10 um	3.67887
10 um	3.52017
10 um	3.23381
10 um	3.36436
10 um	2.61903
10 um	3.34576
10 um	3.45998
10 um	2.9654
10 um	3.41484
10 um	3.20052
10 um	2.33646
10 um	3.15549
10 um	3.0983
10 um	2.95061
10 um	2.90461
10 um	4.08129
10 um	3.12729
10 um	3.05255
10 um	3.10325
10 um	3.28751
10 um	3.42497
10 um	3.0767
10 um	3.3309
10 um	3.09485
10 um	3.31483
10 um	3.01715
10 um	2.85246
10 um	2.6126
10 um	2.8292
10 um	2.52977
10 um	2.98823
10 um	3.23167
10 um	3.30445
10 um	3.24382
10 um	3.62574
10 um	3.24006
10 um	2.3764
10 um	2.94891
10 um	3.41843
10 um	3.93262
10 um	3.0482
10 um	2.73076
10 um	2.69413
10 um	2.90413
10 um	2.52093
10 um	2.96633
10 um	4.44326
10 um	2.97402
10 um	4.1948
10 um	3.60745
10 um	2.02045
10 um	2.6757
10 um	2.80263
10 um	3.22773
10 um	3.38606
10 um	2.82132
10 um	2.44116
10 um	3.48958
10 um	2.20726
10 um	3.35306
10 um	2.33642
10 um	2.76509
10 um	3.83928
10 um	2.65391
10 um	3.48778
10 um	2.54191
10 um	2.88004
10 um	3.42687
10 um	2.79429
10 um	3.03051
10 um	3.19403
10 um	3.12243
10 um	2.02958
10 um	3.35245
10 um	3.67008
10 um	2.51663
10 um	3.39161
10 um	3.06454
10 um	2.48223
10 um	3.08698
10 um	2.30396
10 um	3.64864
10 um	3.14326
10 um	2.96086
10 um	2.23981
10 um	3.12931
10 um	4.23337
10 um	2.72489
10 um	4.31179
10 um	2.30422
10 um	2.03533
10 um	3.93893
10 um	3.58008
10 um	2.71044
10 um	2.48681
10 um	3.54724
10 um	2.67214
10 um	3.22315
10 um	3.18261
10 um	2.79579
10 um	3.27976
10 um	2.56519
10 um	3.90298
10 um	3.28387
10 um	3.75936
10 um	3.56276
10 um	3.42613
10 um	2.90882
10 um	3.07074
10 um	2.67808
10 um	3.13485
10 um	3.34883
10 um	3.0195
10 um	2.98961
10 um	3.03876
10 um	3.14177
10 um	2.53839
10 um	3.93458
10 um	3.51579
10 um	2.78994
10 um	3.13188
10 um	3.07126
10 um	2.93409
10 um	3.55131
10 um	3.83392
10 um	3.6069
10 um	3.16658
10 um	3.20057
10 um	3.56351
10 um	2.88869
10 um	3.63165
10 um	3.83252
10 um	3.63761
10 um	3.36472
10 um	4.29103
10 um	3.178
10 um	2.46797
10 um	2.68127
10 um	3.0001
10 um	3.08582
10 um	2.76056
10 um	2.44156
10 um	3.15183
10 um	2.42616
10 um	3.2363
10 um	3.6253
10 um	2.44344
10 um	3.54
10 um	3.39583
10 um	3.38598
10 um	2.87873
10 um	3.4229
10 um	3.63025
10 um	2.09895
10 um	3.57061
10 um	3.15616
10 um	4.08872
10 um	3.02581
10 um	2.62899
10 um	2.23917
10 um	2.02686
10 um	4.25973
10 um	3.02086
10 um	3.08122
10 um	3.86661
10 um	3.94456
10 um	3.00559
10 um	3.5816
10 um	3.57083
10 um	2.24197
10 um	2.32462
10 um	2.50326
10 um	3.10734
10 um	3.40076
10 um	3.08274
10 um	1.93802
10 um	2.25417
10 um	2.71917
10 um	2.20392
10 um	3.0154
10 um	3.29595
10 um	1.98952
10 um	2.92656
10 um	2.61469
10 um	2.30332
10 um	3.58276
10 um	3.79075
10 um	3.03669
10 um	2.99241
10 um	3.18593
10 um	4.2346
10 um	3.6575
10 um	3.44946
10 um	2.6963
10 um	2.47832
10 um	2.94396
10 um	3.84076
10 um	2.88798
10 um	3.42843
10 um	4.22508
10 um	3.66862
10 um	2.79233
10 um	3.72408
10 um	2.61733
10 um	3.6722
10 um	2.55435
10 um	3.32445
10 um	2.4507
10 um	2.56261
10 um	2.2306
10 um	2.40446
10 um	3.77847
10 um	3.01163
10 um	2.60578
10 um	3.19255
10 um	3.05356
10 um	3.22084
10 um	2.85852
10 um	3.21178
10 um	2.47753
10 um	2.95833
10 um	3.44869
10 um	3.52409
10 um	3.65064
10 um	3.38619
10 um	2.2505
10 um	2.75829
10 um	2.85146
10 um	2.70651
10 um	1.9762
10 um	3.04284
10 um	2.28203
10 um	3.14652
10 um	2.46749
10 um	2.2778
10 um	3.10705
10 um	2.09907
10 um	2.84405
10 um	2.47646
10 um	3.2953
10 um	3.26617
10 um	2.86765
10 um	2.33081
10 um	3.59079
10 um	3.92299
10 um	3.66853
10 um	3.39501
10 um	2.54371
10 um	3.0303
10 um	3.5545
10 um	4.11418
10 um	3.57567
10 um	3.17219
10 um	3.10785
10 um	2.49519
10 um	2.6647
10 um	2.92903
10 um	2.43526
10 um	3.44845
10 um	2.7064
10 um	3.57349
10 um	3.4856
10 um	3.25004
10 um	3.08807
10 um	2.0004
10 um	2.89403
10 um	2.84802
10 um	3.18739
10 um	2.47911
10 um	3.16302
10 um	2.69949
10 um	2.50084
10 um	2.95894
10 um	2.79397
10 um	2.9767
10 um	3.0227
10 um	3.1642
10 um	4.1662
10 um	2.88842
10 um	2.37676
10 um	2.36177
10 um	3.50809
10 um	2.81397
10 um	3.26074
10 um	3.59371
10 um	3.13016
10 um	3.47208
10 um	3.59812
10 um	3.317
10 um	3.81233
10 um	4.2863
10 um	2.69813
10 um	2.12556
10 um	3.25157
10 um	2.15689
10 um	3.00715
10 um	2.64126
10 um	2.28264
10 um	1.94782
10 um	3.76172
10 um	3.34948
10 um	3.00923
10 um	2.15791
10 um	3.58423
10 um	2.98515
10 um	3.62086
10 um	3.4825
10 um	2.76582
10 um	2.61961
10 um	2.88022
10 um	3.8026
10 um	3.13332
10 um	2.15631
10 um	2.45792
10 um	4.1791
10 um	3.22974
10 um	2.7671
10 um	3.767
10 um	3.62085
10 um	4.00653
10 um	3.05101
10 um	2.83293
10 um	2.1708
10 um	3.1315
10 um	3.34041
10 um	3.2617
10 um	3.72859
10 um	2.59911
10 um	2.20935
10 um	3.32662
10 um	3.63101
10 um	3.96309
10 um	2.77302
10 um	2.97186
10 um	2.33361
10 um	2.53243
10 um	3.011
10 um	3.12978
10 um	3.09774
10 um	3.32578
10 um	3.09375
10 um	3.26011
10 um	3.10619
10 um	2.88581
10 um	3.73075
10 um	2.57448
10 um	3.65041
10 um	2.93404
10 um	2.73751
10 um	2.77561
10 um	2.80261
10 um	3.16159
10 um	3.00069
10 um	2.5303
10 um	3.32965
10 um	3.17594
10 um	2.33364
10 um	2.7341
10 um	3.10015
10 um	3.22721
10 um	2.78301
10 um	2.39092
10 um	2.637
10 um	4.49453
10 um	3.00863
10 um	2.02235
10 um	2.64017
10 um	3.54808
10 um	3.12843
10 um	4.06496
10 um	2.95809
10 um	3.73877
10 um	2.76874
10 um	2.41802
10 um	3.45898
10 um	3.27149
10 um	2.83634
10 um	3.51469
10 um	3.07513
10 um	2.98201
10 um	2.94151
10 um	3.33348
10 um	2.93889
10 um	3.44862
10 um	2.4551
10 um	2.72676
10 um	2.64522
10 um	3.40901
10 um	3.8311
10 um	2.92339
10 um	3.04481
10 um	3.12184
10 um	2.77783
10 um	2.82685
10 um	3.2799
10 um	2.40128
10 um	2.46923
10 um	3.85116
10 um	2.82505
10 um	2.73255
10 um	3.27995
10 um	3.60152
10 um	3.78515
10 um	2.12234
10 um	3.43687
10 um	2.98411
10 um	2.86828
10 um	3.11931
10 um	3.53788
10 um	3.94162
10 um	2.98805
10 um	3.86144
10 um	3.16811
10 um	2.8537
10 um	3.42612
10 um	4.3679
10 um	2.26502
10 um	3.60006
10 um	1.94613
10 um	1.91928
10 um	3.49754
10 um	2.3187
10 um	1.95972
10 um	3.57657
10 um	2.47663
10 um	3.25337
10 um	2.4988
10 um	2.84896
10 um	3.05249
10 um	2.1669
10 um	3.24104
10 um	3.27989
10 um	2.40067
10 um	2.48904
10 um	3.94163
10 um	2.17335
10 um	2.81529
10 um	2.69765
10 um	4.40946
10 um	3.5786
10 um	2.52848
10 um	3.05118
10 um	3.22364
10 um	2.4167
10 um	2.85831
10 um	1.90769
10 um	3.41229
10 um	2.74064
10 um	2.79964
10 um	2.45783
10 um	2.49307
10 um	3.34521
10 um	2.48404
10 um	2.68251
10 um	2.94573
10 um	3.69516
10 um	3.34638
10 um	2.85319
10 um	3.41836
10 um	3.12361
10 um	3.8147
10 um	3.77192
10 um	2.47321
10 um	2.63005
10 um	3.90242
10 um	2.82306
10 um	3.2616
10 um	3.05287
10 um	2.41287
10 um	3.45658
10 um	2.06196
10 um	2.99958
10 um	4.06447
10 um	3.31722
10 um	3.14536
10 um	2.71575
10 um	2.58639
10 um	3.75046
10 um	3.36971
10 um	3.22068
10 um	2.81394
10 um	2.2195
10 um	2.86928
10 um	3.22234
10 um	2.8041
10 um	2.86565
10 um	3.43083
10 um	2.95055
10 um	2.24866
10 um	2.93004
10 um	2.83615
10 um	2.70969
10 um	2.58777
10 um	3.94404
10 um	3.39589
10 um	2.91222
10 um	3.15976
10 um	2.88126
10 um	3.16092
10 um	4.30657
10 um	2.91796
10 um	2.74997
10 um	2.55418
10 um	2.96622
10 um	2.88678
10 um	3.40787
10 um	3.85011
10 um	1.94256
10 um	3.4068
10 um	2.50138
10 um	2.48787
10 um	2.60432
10 um	4.27508
10 um	2.15519
10 um	2.54156
10 um	2.71482
10 um	3.30365
10 um	3.0083
10 um	2.02504
10 um	2.27082
10 um	2.39529
10 um	3.196
10 um	3.89294
10 um	3.55606
10 um	2.88994
10 um	2.8571
10 um	3.61458
10 um	2.13282
10 um	3.26009
10 um	2.35263
10 um	4.3973
10 um	3.18646
10 um	3.54138
10 um	2.05776
10 um	4.18571
10 um	2.70654
10 um	4.24349
10 um	3.26528
10 um	3.39707
10 um	2.72536
10 um	2.31831
10 um	3.80536
10 um	2.61113
10 um	2.42183
10 um	3.23412
10 um	2.84843
10 um	3.09493
10 um	2.19793
10 um	2.65065
10 um	2.88792
10 um	2.85497
10 um	3.54697
10 um	2.58277
10 um	2.00894
10 um	2.71939
10 um	2.3511
10 um	2.98184
10 um	2.71382
10 um	2.37776
10 um	2.98313
10 um	1.93117
10 um	3.75329
10 um	2.73138
10 um	3.68624
10 um	2.7874
10 um	3.24427
10 um	3.04042
10 um	3.49057
10 um	3.35001
10 um	2.89722
10 um	2.58742
10 um	2.57086
10 um	2.15574
10 um	2.22152
10 um	2.88025
10 um	2.54121
10 um	3.1274
10 um	2.89991
10 um	2.0915
10 um	2.62219
10 um	3.5226
10 um	3.18381
10 um	3.09829
10 um	2.67097
10 um	3.0497
10 um	3.76807
10 um	3.38706
10 um	2.28646
10 um	2.84757
10 um	3.11249
10 um	3.22674
10 um	2.63052
10 um	2.84292
10 um	2.84374
10 um	2.55501
10 um	2.89197
10 um	3.3852
10 um	2.72419
10 um	3.21019
10 um	3.00257
10 um	3.02013
10 um	3.60645
10 um	3.42708
10 um	2.24378
10 um	2.50156
10 um	2.9451
10 um	3.18842
10 um	3.57328
10 um	3.7501
10 um	2.87099
10 um	3.28694
10 um	2.31711
10 um	3.16459
10 um	2.73662
10 um	3.77609
10 um	3.73542
10 um	3.69568
10 um	2.57716
10 um	3.1174
10 um	4.00961
10 um	3.11163
10 um	3.65403
10 um	2.32929
10 um	3.86005
10 um	3.32189
10 um	3.36504
10 um	2.20666
10 um	4.54406
10 um	3.03618
10 um	2.66199
10 um	3.21464
10 um	3.75873
10 um	3.39475
10 um	2.27735
10 um	3.51823
10 um	3.10817
10 um	3.38168
10 um	2.83419
10 um	3.40521
10 um	2.83412
10 um	3.03377
10 um	3.22266
10 um	2.48283
10 um	3.78086
10 um	2.68071
10 um	3.40213
10 um	3.18286
10 um	4.17608
10 um	3.12485
10 um	2.0182
10 um	3.35892
10 um	4.18247
10 um	3.2137
10 um	3.14261
10 um	2.76654
10 um	3.17559
10 um	3.52325
10 um	3.11612
10 um	3.38051
10 um	2.36566
10 um	3.1167
10 um	3.25658
10 um	3.33787
10 um	4.46189
10 um	1.94768
10 um	3.34204
10 um	3.32271
10 um	3.44559
10 um	2.0561
10 um	3.10776
10 um	2.28733
10 um	3.25186
10 um	2.90723
10 um	2.97093
10 um	3.06867
10 um	3.8646
10 um	2.97675
10 um	3.01232
10 um	2.90019
10 um	3.30764
10 um	3.73608
10 um	2.37896
10 um	3.18064
10 um	3.24053
10 um	2.32244
10 um	1.91251
10 um	2.54158
10 um	2.95421
10 um	2.71303
10 um	2.45603
10 um	3.28597
10 um	3.19276
10 um	2.84791
10 um	2.74296
10 um	2.96717
10 um	2.476
10 um	4.26041
10 um	3.57297
10 um	4.08138
10 um	3.34734
10 um	3.10046
10 um	2.60154
10 um	3.33695
10 um	3.37315
10 um	2.27405
10 um	3.85617
10 um	2.83013
10 um	2.95397
10 um	2.29154
10 um	4.28051
10 um	3.46609
10 um	1.98326
10 um	3.16297
10 um	2.48774
10 um	3.15172
10 um	2.26271
10 um	3.1843
10 um	2.24395
10 um	3.60745
10 um	2.28465
10 um	3.91844
10 um	4.15126
10 um	2.93667
10 um	2.7501
10 um	3.13419
10 um	3.18451
10 um	2.4049
10 um	3.91479
10 um	3.22945
10 um	2.04213
10 um	3.02731
10 um	2.918
10 um	3.29974
10 um	2.92602
10 um	4.18806
10 um	3.00535
10 um	2.81434
10 um	2.74551
10 um	2.67464
10 um	3.09211
10 um	3.41489
10 um	4.07182
10 um	3.89636
10 um	2.25507
10 um	3.38581
10 um	2.30467
10 um	2.95512
10 um	2.65992
10 um	2.94023
10 um	3.17663
10 um	2.60894
10 um	2.2399
10 um	3.30189
10 um	4.11716
10 um	2.80773
10 um	2.93027
10 um	3.39004
10 um	2.88699
10 um	2.74035
10 um	2.20665
10 um	2.2522
10 um	3.61635
10 um	3.90169
10 um	3.15308
10 um	3.63586
10 um	3.10967
10 um	3.21055
10 um	2.54371
10 um	3.38897
10 um	2.49708
10 um	3.64769
10 um	3.18029
10 um	3.08855
10 um	2.8073
10 um	3.66152
10 um	3.28658
10 um	3.19464
10 um	3.09871
10 um	2.36995
10 um	3.78611
10 um	3.47157
10 um	2.12566
10 um	3.5885
10 um	2.07907
10 um	3.40724
10 um	2.82644
10 um	2.59434
10 um	3.40669
10 um	3.56157
10 um	2.75708
10 um	3.95699
10 um	3.02847
10 um	3.26689
10 um	2.6591
10 um	2.88859
10 um	2.79829
10 um	2.31809
10 um	3.77911
10 um	2.98213
10 um	3.14307
10 um	2.82685
10 um	3.63987
10 um	2.43471
10 um	3.37212
10 um	2.75344
10 um	3.16771
10 um	3.26176
10 um	2.69496
10 um	1.98185
10 um	2.78991
10 um	3.14321
10 um	3.32615
10 um	2.85673
10 um	2.85908
10 um	2.32664
10 um	3.29371
10 um	2.94929
10 um	1.97753
10 um	3.07712
10 um	3.41041
10 um	3.62009
10 um	3.00092
10 um	2.74753
10 um	3.59829
[truncated: 14,850 more rows]
