# Supplementary material for: Three-dimensional single-cell transcriptome imaging of thick tissues
Source: eLife. 2024 Dec 27;12:RP90029. doi: 10.7554/eLife.90029 (PMC11677232; doi:10.7554/eLife.90029)
Supplement: Figure 1—source data 1. [file elife-90029-fig1-data1.xlsx]

## Sheet: Figure 1b
genes	RNA copy number / FOV 1s exposure time	RNA copy number / FOV 100ms exposure time
1700022I11Rik	9.82	2.83
1810046K07Rik	11.76	2.97
5031425F14Rik	11.46	2.89
5730522E02Rik	12.37	2.34
Acta2	76.73	17.25
Adam2	2.3	0.14
Adamts2	20.15	9.77
Adamts4	25.26	5.3
Adra1b	69.9	13.3
Alk	31.38	13.32
Ankfn1	10.68	1.7
Ano4	83.15	25.13
Aqp4	103.12	16.85
Asic4	18.94	5.41
B4galnt2	12.55	2.29
B4galnt3	18.81	3.08
Barx2	37.33	10.15
Bcl11b	66.33	12.49
Bdnf	58.81	13.16
Bgn	27.39	11.63
Blnk	35.28	6.71
Bmpr1b	22.1	3.57
Brinp3	67.07	20.13
C1ql3	194.21	64.19
C1qtnf7	3.77	0.36
Cacng5	20.17	5.66
Calb2	245.9	127.28
Camk2d	203.6	73.16
Car3	47.34	25.44
Cbln2	193.94	70.55
Cbln4	35.88	2.43
Ccbe1	48.31	15.56
Ccdc162	20.45	9.54
Ccdc3	47.69	8.6
Ccdc80	22.25	3.85
Ccnb1	10.87	1.24
Cd14	11.04	3.03
Cd24a	56.14	14.78
Cdca7	7.28	1.55
Cdcp1	52.87	33.33
Cdh12	187.91	40.98
Cdh13	90.02	32.19
Cdh20	71.68	22.06
Cdh9	25.33	5.89
Ceacam9	5.68	1.16
Cemip	93.84	45.82
Chat	13.73	3.22
Chn2	20.22	0.74
Chodl	13.14	2.4
Chrm2	35.74	5.98
Chrna2	15.58	2.77
Cldn5	101.27	12.46
Clrn1	3.49	0.51
Cntnap5b	44.4	9.54
Cobll1	39.54	12.44
Col14a1	94.9	64.18
Col15a1	28.17	5.68
Col23a1	14.98	1.87
Col24a1	13.13	4.35
Col25a1	84.14	31.44
Corin	12.99	2.24
Cplx3	32.53	13.33
Crhr2	7.65	2.26
Crispld2	14.04	2.33
Cspg4	27.45	7.91
Ctss	91.65	14.34
Cux2	494.64	128.81
Cxcl14	425.32	148.85
Daam2	205.84	89.42
Dmkn	5.56	1.07
Dnase1l3	7.05	2.09
Dscaml1	178.86	73.29
Egfem1	15.16	3.24
Egfr	48.81	23.47
Egln3	36.96	17.84
Egr2	69.51	37.59
Elfn1	74.63	29.01
Enpp6	11.07	3.42
Epha7	123.46	32.43
Fam19a2	118.18	37.1
Fam84b	37.14	11.14
Fbxl7	3.4	0.47
Fezf2	66.12	20.19
Flrt3	69.07	19.04
Flt1	141.24	40.17
Fndc7	6.77	1.01
Fosb	44.48	21.53
Foxp2	10.58	0.84
Frem2	11.42	1.1
Fst	18.44	3.6
Gfap	93.36	17.2
Glra1	35.8	14.88
Gpc6	56.44	9
Grik1	74.01	22.55
Grin3a	63.51	20.43
Grm1	122.82	55.8
Grm8	73.33	19.97
Hpse	9.7	3.53
Hs3st5	10.6	2.07
Igf2	21.83	2.11
Igfbp4	209.83	60.56
Igfbp5	450.55	178.95
Ikzf2	9.91	1.02
Il1rapl2	15.33	2.12
Il4ra	9.52	1.86
Inpp4b	11.56	0.84
Iqgap2	129.4	32.37
Itgb8	34.79	6.96
Kcng1	123.44	63.11
Kcnj8	6.65	1.92
L3mbtl4	61.46	38.45
Lama3	14.54	4.25
Lhx6	55.84	17.07
Lmo1	12.6	1.57
Lsp1	22.93	7.91
Ltf	3.19	0.45
Luzp2	223.73	31.75
Lypd1	29.58	4.6
Lyzl4	5.2	0.94
1-Mar	40.11	10.54
Marcksl1	106.93	47.31
Meis2	150.39	44.11
Moxd1	11.66	2.07
Mrc1	8.49	0.86
Mrgprx2	3.74	0.21
Muc20	10.64	4.25
Myh14	138.25	58.78
Ndst4	26.84	11.04
Nhs	16.35	3.97
Nkain3	17.4	2.62
Nnmt	26.24	8.14
Nos1	51.96	19.8
Npas1	31.8	9
Npnt	106.43	51.63
Npsr1	5.57	0.82
Npy2r	9.74	2.11
Nr2f2	25.56	3.53
Nr4a1	218.12	46.65
Nr4a2	13.35	2.71
Ntng2	155.77	40.05
Nxph1	48.23	10.67
Nxph2	9.41	2.41
Nxph4	4.23	0.12
Olah	6.91	0.57
Olfm3	27.16	4.58
Opalin	19.16	1.91
Oprk1	14.22	2.42
Osr1	6.89	0.78
Otof	41.86	16.33
Parm1	231.73	78.2
Pcdh8	53.09	11.94
Pde11a	22.09	8.17
Pdgfc	16.13	3.92
Pdgfra	98.35	40.24
Pdlim5	43.68	6.39
Phactr2	56.81	11.16
Plch1	39.37	12.25
Plcxd3	25.97	5.47
Pld5	24.95	5.85
Plekhg3	40.53	13.66
Pou3f1	99.03	26.95
Pou3f3	454.46	93.76
Pou6f2	15.05	3.38
Prdm8	105.08	26.53
Prok2	9.08	1.85
Prokr2	3.32	0.3
Prox1	38.56	18.15
Prr16	53.11	6.97
Prss12	43.77	13.83
Prss23	54.44	7.4
Ptger3	14.31	2.9
Ptprk	253.66	128.03
Ptprm	204.48	64.26
Ptprt	331.23	87.02
Ptpru	40.45	12.29
Pxdc1	15.04	2.9
Ramp1	95.98	17.73
Reln	83.01	51.72
Rerg	19	6.27
Rfx3	47.33	12.42
Rgs5	380.45	70.25
Rgs6	365.68	150.71
Rnf152	29.69	6.45
Ror1	21.27	3.77
Rorb	160.03	32.55
Rspo1	81.16	21.47
Rxfp1	33.38	14.49
Rxfp2	8.08	0.85
Satb2	362.73	116.11
Scgn	7.12	0.45
Sema3e	29.11	5.43
Sema5a	27.94	7
Serpinf1	7.49	1.16
Sertm1	56.65	7.55
Sgcd	13.75	0.56
Shisa9	178.11	52.25
Slc17a6	70.64	25.14
Slc17a8	115.67	96.34
Slc25a13	6.53	1.14
Slc30a3	427.39	78.89
Slc32a1	177.16	54.82
Slc44a5	11.14	2.31
Slco5a1	10.33	1.39
Sncg	10.19	2.16
Sox10	36.84	2.92
Sox6	34.18	5.34
Sp8	12.29	1.05
Spon1	77.1	27.96
St6galnac5	59.91	9.98
Sulf1	20.08	5.95
Sulf2	378.27	140.28
Syndig1	172.49	23.22
Syt10	23.11	9.26
Syt6	15.01	1.75
Tbc1d4	26.68	4.94
Tcap	53.73	9.13
Teddm3	6.77	1.79
Tenm3	195.48	72.75
Th	4.45	0.93
Thbs2	16.27	5.25
Thsd7a	91.68	25.68
Timp3	251.64	68.37
Tmem163	15.36	1.32
Tmtc2	51.55	12.14
Tnfaip6	13.73	2.31
Tox	61.96	13.77
Trp53i11	192.84	42.32
Trpc4	76.55	31.94
Trpc6	74.78	27.82
Tshz2	220.7	135.86
Tunar	22.81	5.63
Ubash3b	73.94	19.32
Unc13c	98.18	43.64
Unc5b	35.48	9.57
Unc5d	201.49	98.31
Ust	63.26	25.22
Vipr2	29.48	14.71
Vtn	101.6	20.44
Vwc2	14.34	1.59
Wipf3	518.51	205.78
Wnt7b	41.82	2.09
Zfp804b	68.88	39.49

## Sheet: Figure 1d
genes	RNA copy number / FOV 1s exposure time	RNA copy number / FOV 100ms exposure time
1700022I11Rik	9.82	14.73
1810046K07Rik	11.76	14.25
5031425F14Rik	11.46	19.53
5730522E02Rik	12.37	19.16
Acta2	76.73	93.37
Adam2	2.3	1.51
Adamts2	20.15	39.54
Adamts4	25.26	18.08
Adra1b	69.9	47.99
Alk	31.38	30.14
Ankfn1	10.68	12.68
Ano4	83.15	67.26
Aqp4	103.12	77.99
Asic4	18.94	17.22
B4galnt2	12.55	11.74
B4galnt3	18.81	18.2
Barx2	37.33	33.18
Bcl11b	66.33	44.05
Bdnf	58.81	44.62
Bgn	27.39	42.41
Blnk	35.28	24.54
Bmpr1b	22.1	15.22
Brinp3	67.07	53.55
C1ql3	194.21	207.51
C1qtnf7	3.77	3.67
Cacng5	20.17	17.43
Calb2	245.9	212.97
Camk2d	203.6	160
Car3	47.34	76.25
Cbln2	193.94	175.05
Cbln4	35.88	20.65
Ccbe1	48.31	62.36
Ccdc162	20.45	32.65
Ccdc3	47.69	36.56
Ccdc80	22.25	14.06
Ccnb1	10.87	10.58
Cd14	11.04	13.52
Cd24a	56.14	44.56
Cdca7	7.28	8.53
Cdcp1	52.87	65.12
Cdh12	187.91	135.31
Cdh13	90.02	70.91
Cdh20	71.68	62.03
Cdh9	25.33	28.51
Ceacam9	5.68	7.94
Cemip	93.84	100.15
Chat	13.73	14.92
Chn2	20.22	8.23
Chodl	13.14	16.04
Chrm2	35.74	27.77
Chrna2	15.58	14.94
Cldn5	101.27	50.6
Clrn1	3.49	4.1
Cntnap5b	44.4	29.03
Cobll1	39.54	31.96
Col14a1	94.9	138.29
Col15a1	28.17	20.64
Col23a1	14.98	8.09
Col24a1	13.13	16.27
Col25a1	84.14	86.51
Corin	12.99	15.01
Cplx3	32.53	31.87
Crhr2	7.65	14.78
Crispld2	14.04	13.23
Cspg4	27.45	28.28
Ctss	91.65	67.28
Cux2	494.64	347.89
Cxcl14	425.32	354.14
Daam2	205.84	214.04
Dmkn	5.56	6.32
Dnase1l3	7.05	8.38
Dscaml1	178.86	165.29
Egfem1	15.16	11
Egfr	48.81	84.55
Egln3	36.96	57.09
Egr2	69.51	77.41
Elfn1	74.63	67.7
Enpp6	11.07	12.11
Epha7	123.46	97.48
Fam19a2	118.18	111.72
Fam84b	37.14	30.91
Fbxl7	3.4	2.95
Fezf2	66.12	61.75
Flrt3	69.07	55.72
Flt1	141.24	100.2
Fndc7	6.77	6.97
Fosb	44.48	70.1
Foxp2	10.58	6.46
Frem2	11.42	12.23
Fst	18.44	13.49
Gfap	93.36	68.95
Glra1	35.8	50.67
Gpc6	56.44	38.47
Grik1	74.01	59.06
Grin3a	63.51	66.4
Grm1	122.82	127.57
Grm8	73.33	46.87
Hpse	9.7	13.14
Hs3st5	10.6	9.5
Igf2	21.83	14.75
Igfbp4	209.83	199.45
Igfbp5	450.55	409.23
Ikzf2	9.91	6.46
Il1rapl2	15.33	14.63
Il4ra	9.52	11.36
Inpp4b	11.56	6.67
Iqgap2	129.4	92.9
Itgb8	34.79	29.98
Kcng1	123.44	149.41
Kcnj8	6.65	8.16
L3mbtl4	61.46	83.8
Lama3	14.54	12.8
Lhx6	55.84	40.71
Lmo1	12.6	9.94
Lsp1	22.93	41.6
Ltf	3.19	3
Luzp2	223.73	139.22
Lypd1	29.58	16.45
Lyzl4	5.2	4.94
1-Mar	40.11	32.54
Marcksl1	106.93	116.56
Meis2	150.39	157.68
Moxd1	11.66	12.36
Mrc1	8.49	6.49
Mrgprx2	3.74	3.32
Muc20	10.64	16.1
Myh14	138.25	136.08
Ndst4	26.84	43.73
Nhs	16.35	15.56
Nkain3	17.4	12.64
Nnmt	26.24	33.52
Nos1	51.96	39.64
Npas1	31.8	24.68
Npnt	106.43	93.9
Npsr1	5.57	4.94
Npy2r	9.74	10.07
Nr2f2	25.56	15.41
Nr4a1	218.12	161.13
Nr4a2	13.35	12.96
Ntng2	155.77	96.93
Nxph1	48.23	38.72
Nxph2	9.41	12.15
Nxph4	4.23	2.1
Olah	6.91	4.69
Olfm3	27.16	24.74
Opalin	19.16	11.91
Oprk1	14.22	15.7
Osr1	6.89	8.79
Otof	41.86	43.28
Parm1	231.73	199.7
Pcdh8	53.09	38.58
Pde11a	22.09	21.26
Pdgfc	16.13	16.06
Pdgfra	98.35	125.72
Pdlim5	43.68	33.17
Phactr2	56.81	34.01
Plch1	39.37	35.26
Plcxd3	25.97	23.71
Pld5	24.95	19.36
Plekhg3	40.53	44.46
Pou3f1	99.03	118.75
Pou3f3	454.46	303.05
Pou6f2	15.05	12.1
Prdm8	105.08	87.75
Prok2	9.08	9.15
Prokr2	3.32	2.69
Prox1	38.56	52.11
Prr16	53.11	34.2
Prss12	43.77	37.45
Prss23	54.44	35.92
Ptger3	14.31	13.68
Ptprk	253.66	240.12
Ptprm	204.48	165.56
Ptprt	331.23	248.01
Ptpru	40.45	34.91
Pxdc1	15.04	14.31
Ramp1	95.98	65.95
Reln	83.01	103.64
Rerg	19	22.95
Rfx3	47.33	45.29
Rgs5	380.45	278.78
Rgs6	365.68	322.05
Rnf152	29.69	20.76
Ror1	21.27	23.31
Rorb	160.03	100.87
Rspo1	81.16	70.04
Rxfp1	33.38	35.19
Rxfp2	8.08	7.92
Satb2	362.73	303.23
Scgn	7.12	4.89
Sema3e	29.11	28.3
Sema5a	27.94	24.05
Serpinf1	7.49	5.57
Sertm1	56.65	37.49
Sgcd	13.75	6.71
Shisa9	178.11	132.24
Slc17a6	70.64	69.9
Slc17a8	115.67	258.83
Slc25a13	6.53	7.61
Slc30a3	427.39	269.62
Slc32a1	177.16	156.58
Slc44a5	11.14	8.72
Slco5a1	10.33	6.33
Sncg	10.19	11.87
Sox10	36.84	21.38
Sox6	34.18	20.34
Sp8	12.29	8.71
Spon1	77.1	83.62
St6galnac5	59.91	36.06
Sulf1	20.08	28.25
Sulf2	378.27	329.7
Syndig1	172.49	104.09
Syt10	23.11	37.86
Syt6	15.01	9.18
Tbc1d4	26.68	17.9
Tcap	53.73	53.7
Teddm3	6.77	8.11
Tenm3	195.48	180.16
Th	4.45	5.78
Thbs2	16.27	14.04
Thsd7a	91.68	66.07
Timp3	251.64	221.75
Tmem163	15.36	9.91
Tmtc2	51.55	39.9
Tnfaip6	13.73	15.12
Tox	61.96	44.21
Trp53i11	192.84	143.4
Trpc4	76.55	88.14
Trpc6	74.78	81.27
Tshz2	220.7	293.07
Tunar	22.81	18.86
Ubash3b	73.94	59.06
Unc13c	98.18	134.22
Unc5b	35.48	30.67
Unc5d	201.49	207.46
Ust	63.26	59.76
Vipr2	29.48	47.49
Vtn	101.6	74.12
Vwc2	14.34	11.42
Wipf3	518.51	457.63
Wnt7b	41.82	26.19
Zfp804b	68.88	132.72
