# Supplementary material for: Three-dimensional single-cell transcriptome imaging of thick tissues
Source: eLife. 2024 Dec 27;12:RP90029. doi: 10.7554/eLife.90029 (PMC11677232; doi:10.7554/eLife.90029)
Supplement: Figure 2—source data 1. [file elife-90029-fig2-data1.xlsx]

## Sheet: Figure 2d
genes	RNA copy number per gene / 100^2 µm^2 / z-plane 100-µm-thick tissue	Bulk RNA-seq (FPKM)
Brinp3	3.59795	11.5192
Dscaml1	21.6133	3.50875
Vtn	7.48959	2.29526
Acta2	3.74311	0.676786
Glra1	0.572755	0.127827
Bgn	2.82417	0.786226
Prss23	9.70891	3.41235
Marcksl1	16.9422	12.9831
Nr4a1	26.6969	1.29913
Cdh9	7.77988	4.57089
Clrn1	0.354551	0.110283
Prdm8	13.5757	6.4032
Wnt7b	14.1005	0.896907
Egfr	5.13446	1.56285
Igfbp5	81.7489	16.625
St6galnac5	17.9924	3.61763
Nhs	1.97536	0.681831
Blnk	6.92985	1.17689
Iqgap2	25.3312	9.33663
Igf2	3.98395	1.75053
Hs3st5	2.8513	1.59508
Rfx3	10.0663	4.77604
Flt1	17.0222	3.09164
Cdh13	26.2882	6.27913
Col25a1	15.5606	4.1959
Pou6f2	2.0956	1.44753
Cdh12	21.81	15.6053
Reln	9.10822	1.7338
B4galnt3	1.26905	0.121019
Grin3a	11.8983	1.72372
Tmtc2	7.20156	1.60273
Sema5a	29.0518	3.33163
Ccbe1	2.13323	0.479027
Rgs6	32.7585	13.0603
Npy2r	0.636686	0.35631
Ctss	12.1565	33.9322
Olfm3	7.48405	85.5977
Ano4	9.54814	2.61482
Unc13c	9.86807	3.29819
Cdh20	10.9927	3.27205
Satb2	69.0714	15.1253
Elfn1	6.6484	3.48531
C1ql3	19.1826	19.4887
Col24a1	0.440963	0.38045
Ptpru	19.9645	1.41731
Ramp1	9.7919	9.26946
Npnt	19.9763	2.60793
Crhr2	0.486701	0.0554381
Slc44a5	0.846552	0.310406
Col15a1	1.92039	0.33015
Pdlim5	9.76715	2.16146
Hpse	0.634006	0.126326
Egln3	5.3761	1.39218
Mrc1	1.46326	0.554473
Prr16	3.30748	3.98322
Tnfaip6	1.66232	0.970432
Prok2	0.362412	0.0321352
Cntnap5b	6.58402	2.55094
Pdgfc	2.39316	1.37527
Corin	0.731078	0.0282821
Camk2d	24.2663	12.7791
Ccdc162	0.558046	0.075492
5031425F14Rik	0.296904	0.0265103
Chrna2	1.08027	0.0654367
Vwc2	2.45965	0.878795
Trp53i11	25.4411	4.60942
Chodl	0.445549	0.182476
Cdca7	1.02587	0.284826
Plcxd3	7.56659	2.60377
Egr2	2.05302	0.466238
Ntng2	16.0422	4.53921
Osr1	0.770264	0.395592
Ikzf2	1.464	0.478877
Timp3	30.9018	15.9044
Daam2	24.3395	13.2458
Enpp6	5.26723	1.03014
Zfp804b	1.76898	0.538375
Ccdc80	3.9107	1.42439
Shisa9	28.1661	5.45614
Cd14	1.29031	0.288409
Bcl11b	43.1595	7.28234
Cacng5	3.1446	0.344907
Pou3f3	65.6079	11.1625
Tenm3	24.8423	6.80601
Thsd7a	9.63914	6.85179
Egfem1	1.80569	1.23585
Epha7	21.2159	8.01599
Chn2	3.10244	13.3993
Fndc7	0.562065	0.0393751
Adamts4	13.8486	1.67616
Cux2	36.4711	14.8014
Lhx6	8.86131	1.77304
Ccnb1	0.623286	0.0447665
Ltf	0.33213	0.00546577
Opalin	4.76681	2.22729
Th	1.60827	0.133872
Phactr2	7.28937	6.38315
Nxph2	0.643296	0.564376
Rorb	31.7	20.3885
Tox	15.2055	4.52523
Slc32a1	26.8142	5.51973
Ptprt	58.6666	12.9661
Gpc6	4.79623	2.12232
Fezf2	17.2896	4.67254
Prokr2	0.467941	0.127153
Otof	2.45292	0.413831
Ptger3	1.15837	0.404679
Cldn5	18.2595	2.63981
Asic4	2.62592	0.350706
Tmem163	5.40251	1.68965
Nr4a2	6.13526	4.82603
Ubash3b	18.0148	2.92994
Chat	0.511356	0.0280942
Wipf3	80.5241	11.8391
Sertm1	9.41909	4.02171
Sncg	0.764934	0.329602
Foxp2	12.5295	26.5444
Tcap	3.10446	1.42613
Pdgfra	10.1022	3.80202
Ccdc3	5.26667	2.35856
Fbxl7	0.93755	0.091474
Ndst4	0.574125	0.134388
Scgn	0.80555	0.0674668
Prox1	4.27894	1.08956
Slc17a8	2.24329	0.792581
Cplx3	10.7244	7.10458
Ceacam9	0.466601	0.237844
Rxfp2	1.16299	0.234937
Col23a1	1.86852	0.412836
Syt6	19.519	1.23419
Nxph4	2.46259	0.50308
Nnmt	1.62602	0.0662084
Slc25a13	1.1936	0.218484
Pxdc1	1.653	0.262612
Rxfp1	3.71417	3.90419
Meis2	30.7742	27.4998
Ust	12.3306	2.73711
Tunar	3.51014	1.12207
Ankfn1	0.648448	1.08652
Slc17a6	7.58434	6.23866
Adamts2	1.17561	0.202014
Cxcl14	34.8957	10.5698
Tbc1d4	3.31579	0.341044
Sgcd	1.13551	1.02135
L3mbtl4	1.41844	0.286985
Dmkn	0.591902	1.24207
Lsp1	3.0257	0.762246
Calb2	16.3196	1.52659
Rnf152	10.671	1.39922
Cdcp1	1.75662	0.02785
Bmpr1b	4.68278	2.68873
Cemip	6.73511	1.0356
2024-03-01	7.48792	3.34511
Nkain3	2.33604	0.561798
Col14a1	1.20512	0.0449267
Alk	3.16199	0.612257
Npsr1	0.448169	0.63498
Trpc6	3.53423	5.61778
Nxph1	6.88521	3.43814
Teddm3	0.840359	0.0214975
Car3	0.631326	0.263054
Cd24a	3.59637	1.609
Vipr2	0.405886	0.0301263
Npas1	4.30238	0.496996
Lyzl4	0.751088	0.0809848
Unc5d	12.4724	7.46088
Ptprk	18.896	5.52784
Frem2	1.19801	0.20936
Moxd1	2.5666	0.763948
Cbln2	18.1263	6.482
Il1rapl2	1.44727	2.66775
Lypd1	6.33818	5.86987
Rerg	1.28225	1.21335
Rgs5	34.3882	7.39111
Sulf1	4.93251	3.47282
Syndig1	19.9915	7.72405
Dnase1l3	0.270432	0.00153656
Myh14	12.9913	1.46581
Nr2f2	1.8673	5.0641
Grm1	14.2039	2.92908
Pou3f1	8.20289	2.06454
Serpinf1	1.17481	0.721586
Sox6	8.88838	1.68842
Rspo1	4.70392	6.71747
Cspg4	4.51862	0.34951
Aqp4	28.9222	21.5863
Slco5a1	1.34829	0.119548
Thbs2	2.63283	1.00905
5730522E02Rik	0.304527	0.409702
Ror1	0.590264	0.0503968
Gfap	31.4727	13.1911
Kcng1	18.7423	1.2676
Spon1	34.5592	8.70198
Cbln4	3.65747	2.49574
Barx2	2.21458	3.07667
Kcnj8	0.62415	0.131398
Nos1	7.0276	2.8845
Unc5b	9.53376	0.589882
Adra1b	14.8267	1.37022
Cobll1	5.19279	1.0828
Il4ra	0.296785	0.464893
Itgb8	14	8.82788
Lama3	1.61628	0.436497
Pcdh8	6.94	1.09166
Prss12	18.0164	3.20151
Lmo1	1.73607	0.717615
Sox10	12.6668	2.34712
Chrm2	7.74728	7.97584
Fosb	3.95745	0.769098
Grik1	5.84955	1.53076
Syt10	3.10175	2.02019
Sulf2	88.5376	6.65648
Grm8	12.974	5.65687
Trpc4	9.08592	1.83817
Parm1	30.2702	9.52874
Tshz2	16.571	3.48962
Inpp4b	2.53897	0.661409
C1qtnf7	0.386651	0.135753
Luzp2	46.0036	44.9368
Ptprm	18.9798	10.2543
Adam2	0.641778	0.00327644
Flrt3	9.00832	2.94432
Fst	2.17028	0.617362
Igfbp4	32.3966	16.7764
Oprk1	0.899644	1.15642
Pld5	2.87506	2.22707
Slc30a3	32.9933	4.32562
Sp8	0.646899	0.209852
Sema3e	3.71652	8.25559
Plch1	5.28141	0.598033
Bdnf	9.22718	2.69479
Pde11a	1.57409	0.398746

## Sheet: Figure 2e
Tissue Depth (um)	Correlations with bulk RNA-seq
1	0.818202
2	0.818573
3	0.821816
4	0.821062
5	0.82134
6	0.822612
7	0.822792
8	0.822017
9	0.82033
10	0.819318
11	0.820816
12	0.820525
13	0.823024
14	0.822354
15	0.822547
16	0.824491
17	0.826137
18	0.824382
19	0.823297
20	0.823705
21	0.824136
22	0.823414
23	0.825111
24	0.82528
25	0.82366
26	0.826621
27	0.823062
28	0.825095
29	0.826818
30	0.822842
31	0.82332
32	0.821759
33	0.823771
34	0.826042
35	0.822781
36	0.820962
37	0.821066
38	0.824177
39	0.825398
40	0.824892
41	0.82218
42	0.82333
43	0.823457
44	0.8258
45	0.823778
46	0.824806
47	0.82491
48	0.825415
49	0.82373
50	0.821524
51	0.821519
52	0.822205
53	0.823445
54	0.821951
55	0.821138
56	0.822321
57	0.822407
58	0.821012
59	0.82176
60	0.822112
61	0.823414
62	0.822668
63	0.820581
64	0.822653
65	0.820241
66	0.8222
67	0.820488
68	0.82001
69	0.821542
70	0.820791
71	0.822119
72	0.8205
73	0.820019
74	0.821671
75	0.823616
76	0.8198
77	0.81995
78	0.824744
79	0.821055
80	0.821081
81	0.821317
82	0.820985
83	0.820934
84	0.820432
85	0.821305
86	0.82135
87	0.820138
88	0.820735
89	0.819718
90	0.819355
91	0.821235
92	0.82115
93	0.822163
94	0.819378
95	0.822767
96	0.820796
97	0.821207
98	0.819235
99	0.817429

## Sheet: Figure 2f
Tissue Depth (um)	RNA count
1	18839.4
2	20253.5
3	20430.1
4	20427.9
5	20426.6
6	20414.8
7	20455.8
8	20448.9
9	20403.1
10	20316.5
11	20258.7
12	20186.1
13	20156
14	20122.6
15	20129.3
16	20066.2
17	20095.4
18	20148.5
19	20205.3
20	20186.6
21	20181.1
22	20134.1
23	20092.6
24	20058.4
25	20064
26	20043.1
27	20039.6
28	20045.9
29	20085.1
30	20093.4
31	20057.7
32	19966.4
33	19956.7
34	19982.4
35	20023.4
36	20042.7
37	20141.8
38	20210
39	20239.4
40	20166.6
41	20135.5
42	20044.9
43	19984.5
44	20002.4
45	20059.5
46	20030.6
47	20057.2
48	20081.8
49	20122.5
50	20144
51	20110.2
52	20106.8
53	20051.2
54	20066.6
55	20097.1
56	20143
57	20154.5
58	20234.1
59	20264.5
60	20316.1
61	20322.5
62	20274.1
63	20287.6
64	20337.7
65	20352.2
66	20358
67	20250.5
68	20184.6
69	20105.5
70	20120.5
71	20138.3
72	20157.2
73	20110.6
74	20078.3
75	20059.6
76	20037.9
77	20015.6
78	19962.6
79	19953
80	19950.8
81	19950.7
82	19924.5
83	19920.9
84	19916.8
85	19962
86	19998.4
87	19980.6
88	19998.3
89	19990.4
90	19931.8
91	19860.3
92	19789.8
93	19752.6
94	19705.1
95	19644.5
96	19651.2
97	19643.3
98	19603
99	19565.5

## Sheet: Figure 2g
genes	RNA copy number per gene / 100^2 µm^2 / z-plane 10-µm-thin tissue	RNA copy number per gene / 100^2 µm^2 / z-plane 100-µm-thick tissue
1700022I11Rik	0.180857	0.310333
1810046K07Rik	0.554789	0.341241
5031425F14Rik	0.223721	0.296904
5730522E02Rik	0.385823	0.304527
Acta2	6.25995	3.74311
Adam2	0.409381	0.641778
Adamts2	1.22324	1.17561
Adamts4	8.14347	13.8486
Adra1b	14.4219	14.8267
Alk	2.89075	3.16199
Ankfn1	1.12814	0.648448
Ano4	10.4375	9.54814
Aqp4	21.4117	28.9222
Asic4	2.50717	2.62592
B4galnt2	0.344224	0.52005
B4galnt3	0.817039	1.26905
Barx2	2.01538	2.21458
Bcl11b	26.3079	43.1595
Bdnf	4.11313	9.22718
Bgn	2.38359	2.82417
Blnk	4.15272	6.92985
Bmpr1b	4.52413	4.68278
Brinp3	5.77433	3.59795
C1ql3	31.4933	19.1826
C1qtnf7	0.256855	0.386651
Cacng5	2.9351	3.1446
Calb2	4.13452	16.3196
Camk2d	24.8519	24.2663
Car3	0.646176	0.631326
Cbln2	16.7405	18.1263
Cbln4	3.98491	3.65747
Ccbe1	1.79668	2.13323
Ccdc162	0.447207	0.558046
Ccdc3	7.22378	5.26667
Ccdc80	3.22453	3.9107
Ccnb1	0.407494	0.623286
Cd14	1.90849	1.29031
Cd24a	3.31761	3.59637
Cdca7	0.833876	1.02587
Cdcp1	0.529691	1.75662
Cdh12	18.3927	21.81
Cdh13	19.1801	26.2882
Cdh20	10.7964	10.9927
Cdh9	6.363	7.77988
Ceacam9	0.467175	0.466601
Cemip	7.82022	6.73511
Chat	0.476782	0.511356
Chn2	5.14658	3.10244
Chodl	0.416989	0.445549
Chrm2	6.06719	7.74728
Chrna2	1.3251	1.08027
Cldn5	12.2972	18.2595
Clrn1	0.15737	0.354551
Cntnap5b	6.31342	6.58402
Cobll1	4.35503	5.19279
Col14a1	0.961743	1.20512
Col15a1	2.42216	1.92039
Col23a1	2.34367	1.86852
Col24a1	1.07658	0.440963
Col25a1	10.7512	15.5606
Corin	0.550893	0.731078
Cplx3	4.80333	10.7244
Crhr2	0.354504	0.486701
Crispld2	0.928384	1.04972
Cspg4	3.10813	4.51862
Ctss	14.9375	12.1565
Cux2	36.4101	36.4711
Cxcl14	27.6179	34.8957
Daam2	15.5256	24.3395
Dmkn	0.386833	0.591902
Dnase1l3	0.132884	0.270432
Dscaml1	17.413	21.6133
Egfem1	1.65681	1.80569
Egfr	3.87609	5.13446
Egln3	3.42016	5.3761
Egr2	1.24339	2.05302
Elfn1	6.5108	6.6484
Enpp6	1.82433	5.26723
Epha7	16.9831	21.2159
Fam19a2	9.40791	5.67011
Fam84b	4.31473	5.36359
Fbxl7	0.514709	0.93755
Fezf2	10.5527	17.2896
Flrt3	8.60658	9.00832
Flt1	16.729	17.0222
Fndc7	0.245382	0.562065
Fosb	2.44332	3.95745
Foxp2	9.83073	12.5295
Frem2	0.912801	1.19801
Fst	2.03679	2.17028
Gfap	18.8916	31.4727
Glra1	0.678658	0.572755
Gpc6	4.73703	4.79623
Grik1	6.5972	5.84955
Grin3a	9.87155	11.8983
Grm1	10.3629	14.2039
Grm8	13.6965	12.974
Hpse	0.471071	0.634006
Hs3st5	3.01493	2.8513
Igf2	5.4706	3.98395
Igfbp4	19.7741	32.3966
Igfbp5	48.3791	81.7489
Ikzf2	2.02277	1.464
Il1rapl2	1.31086	1.44727
Il4ra	0.456059	0.296785
Inpp4b	2.25777	2.53897
Iqgap2	12.3416	25.3312
Itgb8	12.8755	14
Kcng1	11.598	18.7423
Kcnj8	0.589769	0.62415
L3mbtl4	0.65462	1.41844
Lama3	1.74203	1.61628
Lhx6	5.17036	8.86131
Lmo1	1.29362	1.73607
Lsp1	1.97802	3.0257
Ltf	0.317494	0.33213
Luzp2	30.2849	46.0036
Lypd1	7.39299	6.33818
Lyzl4	0.416153	0.751088
2024-03-01	6.62133	7.48792
Marcksl1	12.3084	16.9422
Meis2	18.7725	30.7742
Moxd1	1.61655	2.5666
Mrc1	1.19073	1.46326
Mrgprx2	0.148355	0.487385
Muc20	0.276701	0.539078
Myh14	10.0577	12.9913
Ndst4	0.619252	0.574125
Nhs	1.80575	1.97536
Nkain3	2.55715	2.33604
Nnmt	0.533801	1.62602
Nos1	6.8927	7.0276
Npas1	3.28323	4.30238
Npnt	14.0291	19.9763
Npsr1	0.394624	0.448169
Npy2r	0.557644	0.636686
Nr2f2	3.58154	1.8673
Nr4a1	21.0223	26.6969
Nr4a2	5.62178	6.13526
Ntng2	16.2198	16.0422
Nxph1	8.30789	6.88521
Nxph2	0.608136	0.643296
Nxph4	2.10357	2.46259
Olah	0.82947	0.834493
Olfm3	6.67285	7.48405
Opalin	4.2127	4.76681
Oprk1	2.00829	0.899644
Osr1	0.82226	0.770264
Otof	4.18488	2.45292
Parm1	22.437	30.2702
Pcdh8	6.52377	6.94
Pde11a	0.986637	1.57409
Pdgfc	2.25967	2.39316
Pdgfra	8.89737	10.1022
Pdlim5	5.83804	9.76715
Phactr2	7.3685	7.28937
Plch1	4.1593	5.28141
Plcxd3	5.20716	7.56659
Pld5	2.91755	2.87506
Plekhg3	5.82797	7.68073
Pou3f1	8.07306	8.20289
Pou3f3	50.0874	65.6079
Pou6f2	2.63866	2.0956
Prdm8	11.7666	13.5757
Prok2	0.274539	0.362412
Prokr2	0.26224	0.467941
Prox1	3.42517	4.27894
Prr16	6.46216	3.30748
Prss12	10.3396	18.0164
Prss23	10.6793	9.70891
Ptger3	1.03146	1.15837
Ptprk	23.5516	18.896
Ptprm	16.0725	18.9798
Ptprt	48.7952	58.6666
Ptpru	11.3474	19.9645
Pxdc1	1.28453	1.653
Ramp1	11.0764	9.7919
Reln	7.30052	9.10822
Rerg	1.58035	1.28225
Rfx3	7.36947	10.0663
Rgs5	41.1537	34.3882
Rgs6	28.2422	32.7585
Rnf152	8.83838	10.671
Ror1	0.629053	0.590264
Rorb	25.8798	31.7
Rspo1	3.46796	4.70392
Rxfp1	4.11574	3.71417
Rxfp2	0.783139	1.16299
Satb2	51.3636	69.0714
Scgn	0.471621	0.80555
Sema3e	2.69134	3.71652
Sema5a	12.2328	29.0518
Serpinf1	1.18	1.17481
Sertm1	10.801	9.41909
Sgcd	1.76405	1.13551
Shisa9	23.5384	28.1661
Slc17a6	5.32366	7.58434
Slc17a8	2.03416	2.24329
Slc25a13	0.958918	1.1936
Slc30a3	57.1381	32.9933
Slc32a1	19.9062	26.8142
Slc44a5	1.12416	0.846552
Slco5a1	0.854691	1.34829
Sncg	0.577704	0.764934
Sox10	10.3576	12.6668
Sox6	6.58357	8.88838
Sp8	0.658159	0.646899
Spon1	17.6873	34.5592
St6galnac5	14.3958	17.9924
Sulf1	3.61891	4.93251
Sulf2	52.4557	88.5376
Syndig1	20.3583	19.9915
Syt10	2.53958	3.10175
Syt6	12.8684	19.519
Tbc1d4	2.79967	3.31579
Tcap	2.55209	3.10446
Teddm3	0.452612	0.840359
Tenm3	18.7436	24.8423
Th	0.816784	1.60827
Thbs2	1.67524	2.63283
Thsd7a	10.5394	9.63914
Timp3	20.7051	30.9018
Tmem163	4.43296	5.40251
Tmtc2	5.50694	7.20156
Tnfaip6	1.54981	1.66232
Tox	10.846	15.2055
Trp53i11	21.8715	25.4411
Trpc4	7.72419	9.08592
Trpc6	3.61453	3.53423
Tshz2	12.3234	16.571
Tunar	2.14903	3.51014
Ubash3b	9.71776	18.0148
Unc13c	6.80112	9.86807
Unc5b	7.58174	9.53376
Unc5d	12.7623	12.4724
Ust	7.67404	12.3306
Vipr2	0.314047	0.405886
Vtn	11.4828	7.48959
Vwc2	1.68838	2.45965
Wipf3	66.9037	80.5241
Wnt7b	14.4817	14.1005
Zfp804b	1.70396	1.76898

## Sheet: Figure 2h
gene	10um thin tissue	100um thick tissue
X1700022I11Rik	0.0999554	0.189871
X1810046K07Rik	0.128068	0.237171
X5031425F14Rik	0.102856	0.186301
X5730522E02Rik	0.0957162	0.180723
Acta2	0.695672	1.43262
Adam2	0.26149	0.495091
Adamts2	0.325747	0.621598
Adamts4	2.51495	4.80098
Adra1b	3.41611	6.8784
Alk	0.809683	1.48014
Ankfn1	0.163989	0.312137
Ano4	2.19121	4.17559
Aqp4	1.41611	2.98884
Asic4	0.643463	1.25257
B4galnt2	0.187863	0.333333
B4galnt3	0.37461	0.688309
Barx2	0.587461	1.14659
Bcl11b	6.70705	13.6774
Bdnf	2.31437	4.65573
Bgn	0.432619	0.834449
Blnk	1.48728	3.01026
Bmpr1b	0.562472	1.09505
Brinp3	0.871932	1.69299
C1ql3	4.49197	9.25368
C1qtnf7	0.117135	0.218429
Cacng5	0.683177	1.37818
Calb2	4.03458	7.3842
Camk2d	4.5618	9.20995
Car3	0.22423	0.437974
Cbln2	3.8378	7.8166
Cbln4	0.882865	1.76551
Ccbe1	0.418786	0.840919
Ccdc162	0.171129	0.325971
Ccdc3	0.949799	1.96988
Ccdc80	0.725346	1.47702
Ccnb1	0.199465	0.369924
Cd14	0.3166	0.59884
Cd24a	0.922579	1.74654
Cdca7	0.232709	0.46564
Cdcp1	0.567604	1.0946
Cdh12	4.64257	8.9556
Cdh13	4.63052	9.81995
Cdh20	1.94534	3.79384
Cdh9	1.76952	3.41098
Ceacam9	0.137439	0.274208
Cemip	1.62561	2.93373
Chat	0.169121	0.313253
Chn2	0.757028	1.45739
Chodl	0.142347	0.252789
Chrm2	1.7606	3.39491
Chrna2	0.421464	0.730477
Cldn5	3.1448	5.43887
Clrn1	0.120482	0.233601
Cntnap5b	1.52767	2.92793
Cobll1	0.922133	1.69255
Col14a1	0.330879	0.607988
Col15a1	0.784025	1.33155
Col23a1	0.337349	0.638554
Col24a1	0.124498	0.24788
Col25a1	3.11981	6.36613
Corin	0.293173	0.514056
Cplx3	1.43329	3.10598
Crhr2	0.17693	0.326863
Crispld2	0.295181	0.571174
Cspg4	0.872602	1.63164
Ctss	1.14458	2.36524
Cux2	4.39581	8.8407
Cxcl14	1.52566	3.3079
Daam2	2.22602	4.249
Dmkn	0.203481	0.391343
Dnase1l3	0.0901383	0.174922
Dscaml1	4.02008	7.8349
Egfem1	0.437082	0.840473
Egfr	0.668452	1.23896
Egln3	1.11334	2.33846
Egr2	0.563365	1.11089
Elfn1	0.895582	1.70705
Enpp6	1.18541	2.33222
Epha7	5.68809	11.1446
Fam19a2	1.33936	2.65149
Fam84b	1.02566	2.11111
Fbxl7	0.243641	0.477242
Fezf2	3.67001	7.64837
Flrt3	2.15172	4.01941
Flt1	1.71151	3.05489
Fndc7	0.17693	0.34672
Fosb	0.850067	1.78983
Foxp2	2.11423	4.42749
Frem2	0.21419	0.426149
Fst	0.614904	1.22021
Gfap	0.7278	1.63677
Glra1	0.161535	0.300982
Gpc6	0.900714	1.73806
Grik1	1.22468	2.31995
Grin3a	1.87416	3.71508
Grm1	2.8456	5.58188
Grm8	3.12405	5.99531
Hpse	0.130299	0.25502
Hs3st5	0.73784	1.45917
Igf2	0.504685	1.00201
Igfbp4	6.08813	13.0634
Igfbp5	7.60397	15.691
Ikzf2	0.339134	0.620482
Il1rapl2	0.394244	0.779116
Il4ra	0.0901383	0.16689
Inpp4b	0.566711	1.13565
Iqgap2	4.16577	8.23606
Itgb8	1.97724	3.95337
Kcng1	3.34828	6.84873
Kcnj8	0.165105	0.304328
L3mbtl4	0.407854	0.742303
Lama3	0.401606	0.694556
Lhx6	1.70415	3.26149
Lmo1	0.328202	0.651272
Lsp1	0.563141	1.19545
Ltf	0.114012	0.226238
Luzp2	2.48617	5.27532
Lypd1	1.02454	2.08233
Lyzl4	0.28938	0.532129
X1.Mar	1.39737	2.85475
Marcksl1	3.04685	6.31705
Meis2	4.92994	10.2497
Moxd1	0.685631	1.35654
Mrc1	0.253012	0.503793
Mrgprx2	0.161981	0.310799
Muc20	0.183846	0.372378
Myh14	1.05466	2.06381
Ndst4	0.167559	0.328202
Nhs	0.439982	0.839134
Nkain3	0.430388	0.854975
Nnmt	0.588577	1.06515
Nos1	0.950022	1.85498
Npas1	0.723561	1.48505
Npnt	3.47747	7.09616
Npsr1	0.135207	0.267738
Npy2r	0.2249	0.399375
Nr2f2	0.373271	0.732039
Nr4a1	6.40049	12.523
Nr4a2	1.03436	2.19679
Ntng2	2.26662	4.58255
Nxph1	1.65752	3.12807
Nxph2	0.226015	0.426595
Nxph4	0.646586	1.4353
Olah	0.263052	0.497546
Olfm3	1.92838	3.9054
Opalin	1.20192	2.27465
Oprk1	0.250335	0.49286
Osr1	0.192994	0.403838
Otof	0.462294	0.94199
Parm1	5.85855	11.9128
Pcdh8	1.49398	2.94489
Pde11a	0.43552	0.803882
Pdgfc	0.607095	1.14302
Pdgfra	1.1091	2.17001
Pdlim5	0.815038	1.53057
Phactr2	1.23249	2.31437
Plch1	0.954261	1.91879
Plcxd3	1.74453	3.5734
Pld5	0.627175	1.22289
Plekhg3	1.82597	3.32999
Pou3f1	1.28782	2.73025
Pou3f3	7.36167	14.6361
Pou6f2	0.51361	0.978358
Prdm8	3.19656	6.45872
Prok2	0.119366	0.228246
Prokr2	0.188978	0.354529
Prox1	1.06448	1.971
Prr16	0.644801	1.27711
Prss12	3.26551	6.91611
Prss23	2.59304	5.07631
Ptger3	0.351183	0.663097
Ptprk	4.29183	8.32262
Ptprm	3.54975	6.62829
Ptprt	7.64525	15.4857
Ptpru	3.69366	7.22155
Pxdc1	0.321285	0.640785
Ramp1	1.22758	2.46519
Reln	1.77086	3.50022
Rerg	0.333333	0.6361
Rfx3	2.24163	4.35252
Rgs5	2.68608	5.27934
Rgs6	4.41656	8.50134
Rnf152	2.06649	4.17381
Ror1	0.174029	0.327086
Rorb	3.51785	6.94288
Rspo1	0.813922	1.58791
Rxfp1	0.931058	1.73873
Rxfp2	0.35676	0.678492
Satb2	12.3889	24.8338
Scgn	0.192771	0.378402
Sema3e	1.0589	2.00647
Sema5a	5.01473	10.1412
Serpinf1	0.267068	0.516064
Sertm1	2.19701	4.35185
Sgcd	0.367024	0.715975
Shisa9	5.32552	10.4931
Slc17a6	1.58121	3.11267
Slc17a8	0.583668	1.07564
Slc25a13	0.300759	0.579429
Slc30a3	7.5087	14.9755
Slc32a1	4.69589	9.11334
Slc44a5	0.231593	0.451807
Slco5a1	0.417224	0.790495
Sncg	0.230924	0.441544
Sox10	2.66555	5.1071
Sox6	1.0145	2.00402
Sp8	0.159527	0.331325
Spon1	6.04641	12.4304
St6galnac5	3.09817	6.05734
Sulf1	1.28269	2.61089
Sulf2	14.9958	29.9788
Syndig1	4.17001	8.48617
Syt10	0.793173	1.56917
Syt6	3.5502	7.12651
Tbc1d4	0.870593	1.61647
Tcap	0.749665	1.51896
Teddm3	0.279116	0.539268
Tenm3	4.19768	8.45292
Th	0.329094	0.636546
Thbs2	0.664436	1.2606
Thsd7a	1.98483	3.91254
Timp3	1.96475	3.86502
Tmem163	1.28782	2.8349
Tmtc2	1.43931	2.64079
Tnfaip6	0.505578	0.966756
Tox	3.14012	6.39692
Trp53i11	3.71508	7.74275
Trpc4	2.00156	3.89714
Trpc6	0.432396	0.874163
Tshz2	1.51696	2.84962
Tunar	0.592816	1.21888
Ubash3b	3.36613	6.58813
Unc13c	0.439536	0.866354
Unc5b	2.2809	4.26439
Unc5d	2.72959	5.30522
Ust	2.03124	4.15774
Vipr2	0.0990629	0.211513
Vtn	1.26216	2.27041
Vwc2	0.761714	1.43418
Wipf3	10.6452	21.7294
Wnt7b	2.12427	4.38175
Zfp804b	0.485721	0.937528
