# Supplementary material for: Three-dimensional single-cell transcriptome imaging of thick tissues
Source: eLife. 2024 Dec 27;12:RP90029. doi: 10.7554/eLife.90029 (PMC11677232; doi:10.7554/eLife.90029)
Supplement: Figure 3—source data 1. [file elife-90029-fig3-data1.xlsx]

## Sheet: Figure 3e
celltype	nearest neighbor distance (um)	group
Pvalb	17.8391	other
Pvalb	10.3655	other
Pvalb	13.682	other
Sst	7.17596	self
Pvalb	15.5685	other
Pvalb	8.0647	other
Lamp5	5.16452	self
Pvalb	9.8349	other
Pvalb	14.1224	other
Sst	13.8799	other
Sst	15.8166	other
Pvalb	9.38816	other
Pvalb	11.6276	other
Pvalb	14.6501	other
Pvalb	16.4775	other
Pvalb	14.9935	other
Pvalb	13.0811	other
Sst	14.3951	other
Sst	13.7723	other
Lamp5	18.8647	other
Vip	14.219	other
Vip	16.5905	other
Sst	10.517	self
Pvalb	17.5084	other
Pvalb	11.6193	other
Lamp5	14.4896	other
Lamp5	10.8058	other
Pvalb	19.5216	other
Sst	10.1059	other
Sst	9.41386	other
Pvalb	22.1432	other
Sst	20.3377	other
Pvalb	14.3396	other
Pvalb	13.7478	other
Sst	14.5191	self
Pvalb	9.33418	other
Pvalb	12.9765	other
Pvalb	17.8423	other
Vip	13.6425	other
Sst	13.0508	other
Pvalb	22.1297	other
Sst	18.5639	other
Pvalb	18.4166	other
Pvalb	13.6902	other
Pvalb	13.5762	other
Pvalb	14.9976	other
Pvalb	16.127	other
Sst	5.31202	self
Pvalb	13.4829	other
Pvalb	22.1772	other
Pvalb	11.3291	other
Sst	14.0352	other
Sst	17.24	other
Pvalb	21.5476	other
Pvalb	20.5285	other
Pvalb	9.69787	other
Pvalb	13.2212	other
Sst	10.8621	other
Vip	20.1705	other
Sst	16.2591	other
Vip	14.5102	self
Pvalb	11.4816	self
Pvalb	9.40394	other
Pvalb	15.8965	other
Pvalb	11.6457	other
Lamp5	18.8508	other
Pvalb	15.5956	other
Lamp5	8.67452	self
Pvalb	11.715	other
Lamp5	13.6743	other
Vip	12.6552	other
Vip	16.9196	other
Pvalb	11.606	other
Sst	17.4248	other
Sst	11.3341	other
Lamp5	14.1361	other
Sst	12.1552	other
Sst	15.928	other
Lamp5	11.6296	other
Pvalb	12.6695	other
Vip	13.2015	other
Sst	13.5794	other
Pvalb	12.3392	other
Lamp5	24.1522	other
Vip	8.0017	other
Pvalb	6.49481	self
Pvalb	12.638	other
Vip	15.3024	other
Pvalb	8.94968	other
Pvalb	12.1261	other
Pvalb	15.298	other
Sst	20.1274	other
Vip	7.43146	other
Sst	19.2472	other
Sst	13.3098	other
Pvalb	21.1118	other
Lamp5	20.8713	other
Pvalb	12.3229	other
Lamp5	14.2833	other
Pvalb	10.8575	other
Sst	8.54167	other
Pvalb	20.2246	other
Pvalb	14.4029	other
Sst	11.5294	other
Lamp5	12.7621	other
Pvalb	26.6729	other
Lamp5	16.602	other
Vip	28.1972	other
Sst	17.181	self
Lamp5	13.0908	other
Pvalb	19.6524	other
Vip	12.2753	other
Pvalb	17.5605	other
Pvalb	9.18128	other
Pvalb	16.6665	other
Pvalb	6.77204	self
Pvalb	15.8248	other
Pvalb	17.7646	other
Pvalb	9.02778	other
Pvalb	15.1766	other
Sst	20.5178	self
Lamp5	15.3423	other
Pvalb	10.7327	other
Sst	19.4869	other
Pvalb	17.2627	other
Sst	15.3631	other
Lamp5	17.3518	other
Sst	18.5339	other
Sst	11.4508	other
Pvalb	13.5401	other
Sst	11.1829	other
Vip	13.8525	other
Pvalb	9.22306	self
Lamp5	15.6757	other
Sst	21.5494	other
Lamp5	9.08548	other
Vip	12.699	other
Sst	12.8095	other
Pvalb	15.4111	other
Pvalb	16.3436	other
Sst	26.7268	other
Sst	15.2425	other
Lamp5	20.4975	other
Pvalb	11.8796	other
Lamp5	14.3071	other
Vip	10.5247	other
Pvalb	15.6216	other
Vip	18.563	other
Lamp5	15.0422	other
Vip	16.7587	other
Pvalb	14.154	other
Pvalb	19.1403	other
Vip	16.7296	other
Vip	5.04125	self
Sst	16.144	other
Pvalb	12.2201	other
Pvalb	9.63824	other
Pvalb	18.0484	other
Vip	11.0355	other
Pvalb	15.3797	other
Lamp5	8.18902	other
Lamp5	20.6715	other
Sst	10.2236	other
Sst	10.3889	other
Sst	18.7321	other
Sst	12.7667	other
Lamp5	14.3026	other
Sst	18.034	other
Sst	10.2848	other
Lamp5	15.306	self
Pvalb	15.7144	other
Sst	7.9017	self
Lamp5	7.75677	self
Pvalb	23.4932	other
Sst	14.4653	other
Sst	10.2197	other
Sst	12.3099	other
Pvalb	28.1332	other
Pvalb	18.4829	other
Sst	16.6498	other
Pvalb	14.1495	other
Pvalb	12.1266	other
Pvalb	29.1111	other
Lamp5	16.0615	other
Lamp5	13.5001	other
Pvalb	21.4453	other
Pvalb	7.59048	other
Pvalb	10.6741	other
Lamp5	6.36687	other
Sst	13.0574	other
Vip	14.3711	other
Vip	10.5363	other
Lamp5	16.6337	other
Pvalb	21.0399	self
Pvalb	19.8148	other
Pvalb	16.6399	other
Pvalb	11.9564	other
Pvalb	16.321	other
Sst	16.7017	other
Pvalb	14.5374	other
Sst	22.8982	other
Vip	7.30985	other
Vip	11.4163	other
Pvalb	8.72011	other
Vip	13.4465	other
Sst	19.0871	other
Sst	16.5497	other
Pvalb	13.2189	other
Sst	16.199	other
Pvalb	13.9232	other
Lamp5	5.50821	self
Lamp5	14.6812	other
Sst	11.5847	other
Sst	12.1642	other
Lamp5	18.2259	other
Pvalb	17.2345	other
Vip	10.9067	other
Sst	14.2782	other
Pvalb	23.0582	other
Sst	11.7508	other
Sst	16.5993	other
Pvalb	15.7647	other
Sst	14.4166	other
Pvalb	10.978	other
Pvalb	25.1327	other
Pvalb	15.868	other
Vip	14.0879	other
Sst	15.6259	other
Pvalb	17.4931	other
Lamp5	17.1366	other
Sst	13.1545	self
Vip	9.7498	other
Pvalb	12.3953	other
Sst	16.7197	other
Sst	11.0743	other
Sst	12.9158	other
Sst	13.2825	other
Pvalb	15.6483	other
Sst	10.8629	other
Pvalb	26.2941	other
Vip	12.0481	other
Pvalb	10.3463	other
Pvalb	16.3323	self
Sst	17.0779	other
Sst	11.5344	other
Sst	22.1882	other
Pvalb	11.2998	other
Vip	11.1582	other
Lamp5	12.1425	other
Sst	12.8538	other
Pvalb	11.6432	self
Sst	15.8102	other
Pvalb	14.7656	other
Sst	18.2062	other
Pvalb	22.234	other
Sst	11.1145	other
Sst	17.754	other
Pvalb	18.6806	self
Sst	5.32959	self
Sst	7.70846	other
Pvalb	11.9644	other
Pvalb	15.4989	other
Pvalb	11.9735	other
Pvalb	13.0508	other
Sst	21.9698	other
Pvalb	25.117	other
Sst	7.78124	other
Vip	10.2537	other
Sst	17.614	other
Lamp5	13.5314	other
Sst	21.384	other
Pvalb	27.3479	other
Vip	15.3233	other
Sst	15.8036	self
Pvalb	13.1422	other
Sst	9.85976	other
Vip	16.7552	other
Pvalb	16.9876	other
Sst	12.335	other
Sst	10.8538	other
Pvalb	18.186	other
Sst	20.0698	other
Sst	14.3939	other
Sst	11.1008	other
Vip	9.14167	other
Vip	17.6154	other
Lamp5	21.3887	other
Sst	20.4317	other
Pvalb	13.7796	other
Sst	13.9764	other
Sst	16.3783	other
Pvalb	21.7877	other
Lamp5	18.7725	other
Sst	16.6502	other
Pvalb	17.5293	other
Lamp5	15.5991	other
Lamp5	13.3305	other
Sst	18.2462	other
Sst	15.3619	other
Sst	25.1269	self
Sst	22.0948	other
Pvalb	16.5556	other
Vip	12.6828	other
Pvalb	16.0116	other
Sst	7.04386	self
Lamp5	15.086	other
Lamp5	13.3554	other
Vip	14.2752	other
Vip	14.235	other
Vip	15.504	other
Pvalb	19.3121	other
Pvalb	11.1682	other
Lamp5	16.6715	other
Lamp5	18.0215	other
Vip	11.4267	other
Pvalb	14.3586	other
Pvalb	14.3231	other
Pvalb	17.5719	self
Sst	5.24209	self
Lamp5	16.1757	other
Pvalb	15.6269	self
Sst	11.0385	other
Pvalb	14.0867	other
Vip	9.51266	other
Pvalb	10.8028	other
Sst	12.6038	self
Pvalb	15.4471	other
Sst	24.2567	self
Pvalb	18.3877	other
Pvalb	11.2008	other
Pvalb	14.2942	other
Lamp5	9.32596	self
Pvalb	17.256	other
Pvalb	13.5914	other
Pvalb	9.73024	other
Lamp5	14.8006	other
Pvalb	20.5118	other
Sst	6.26839	self
Pvalb	15.9403	other
Pvalb	25.2633	self
Lamp5	14.932	other
Pvalb	17.5873	other
Sst	7.87267	self
Sst	11.7703	self
Pvalb	15.2992	other
Lamp5	16.1922	other
Sst	13.0361	other
Sst	12.7421	self
Pvalb	19.5269	other
Sst	12.114	other
Sst	15.6818	other
Pvalb	9.93769	other
Pvalb	15.297	other
Sst	16.2564	other
Sst	18.6751	other
Pvalb	17.2282	other
Sst	12.4555	other
Sst	6.88492	self
Sst	15.5966	other
Pvalb	10.6765	other
Sst	18.5658	other
Sst	14.396	other
Pvalb	19.6025	other
Pvalb	13.7014	other
Pvalb	14.9497	other
Lamp5	11.029	other
Pvalb	14.398	other
Sst	14.966	other
Sst	15.7705	self
Lamp5	6.7405	self
Sst	9.49876	other
Pvalb	13.4465	other
Vip	14.2569	other
Vip	14.0013	other
Pvalb	15.5978	other
Lamp5	9.40394	other
Lamp5	16.2591	other
Pvalb	17.2396	other
Sst	15.96	other
Sst	5.91084	self
Lamp5	14.1759	other
Sst	12.7421	self
Vip	23.6858	other
Pvalb	12.4742	self
Sst	15.2419	self
Sst	6.66569	other
Pvalb	16.8196	other
Pvalb	16.1233	other
Sst	17.6109	other
Pvalb	24.7656	other
Sst	12.3882	other
Sst	19.5232	other
Pvalb	17.306	other
Sst	15.4049	other
Pvalb	13.3627	other
Vip	21.8463	other
Pvalb	13.5521	other
Sst	17.4552	other
Pvalb	12.3349	other
Pvalb	14.063	other
Lamp5	15.3908	other
Pvalb	19.384	other
Vip	10.6784	other
Pvalb	15.3981	self
Pvalb	12.4832	other
Sst	14.5655	other
Pvalb	17.9382	other
Pvalb	18.0762	other
Sst	15.2699	other
Pvalb	13.5352	other
Sst	13.329	other
Sst	13.051	other
Sst	10.9902	other
Pvalb	25.9339	other
Sst	18.563	other
Vip	9.4249	other
Pvalb	17.7066	other
Pvalb	5.59145	self
Sst	14.4693	other
Sst	16.5691	other
Pvalb	18.8639	other
Pvalb	8.13317	other
Pvalb	13.6664	other
Pvalb	16.1315	other
Vip	21.9951	other
Pvalb	17.0466	other
Pvalb	12.8168	other
Sst	13.8131	other
Pvalb	16.3902	other
Pvalb	12.3203	other
Sst	7.25266	self
Sst	18.616	other
Pvalb	18.8303	other
Pvalb	14.5679	other
Pvalb	25.332	other
Pvalb	17.7568	other
Sst	15.7838	other
Sst	20.9509	other
Sst	12.8046	other
Pvalb	5.07152	self
Vip	13.402	other
Lamp5	10.6406	other
Pvalb	9.13471	self
Sst	11.69	other
Vip	6.87608	other
Pvalb	13.0726	other
Lamp5	15.8357	other
Sst	18.8648	self
Vip	9.91297	other
Sst	21.8821	other
Sst	7.51589	other
Pvalb	16.9526	other
Sst	21.1116	other
Sst	18.6366	other
Vip	17.9149	other
Vip	19.1331	other
Vip	8.84876	other
Pvalb	13.9077	self
Sst	15.7371	other
Sst	9.95783	other
Pvalb	11.4365	other
Pvalb	11.2641	other
Lamp5	11.0678	other
Sst	16.1905	other
Lamp5	14.7241	other
Pvalb	14.0644	other
Pvalb	15.1023	other
Pvalb	13.3331	other
Sst	11.3399	other
Sst	12.9784	self
Sst	10.6878	other
Lamp5	16.4232	other
Pvalb	23.0088	other
Sst	11.2556	other
Pvalb	26.6716	other
Pvalb	16.9	other
Sst	10.3135	other
Sst	19.7733	other
Sst	14.5191	self
Vip	7.03703	other
Pvalb	17.107	other
Pvalb	13.6755	other
Pvalb	9.88162	other
Sst	22.3359	other
Sst	19.8072	other
Sst	19.8912	other
Vip	8.66228	other
Pvalb	15.0422	other
Sst	17.1108	other
Sst	12.5941	other
Pvalb	12.5533	other
Pvalb	16.1742	other
Lamp5	11.7065	other
Sst	13.469	other
Pvalb	18.5449	other
Sst	22.3734	other
Sst	12.7358	other
Pvalb	17.9548	other
Lamp5	17.606	other
Vip	12.1642	other
Pvalb	17.5537	other
Sst	13.706	other
Pvalb	14.638	other
Pvalb	14.8856	other
Lamp5	16.9126	other
Sst	13.8351	other
Pvalb	18.8267	other
Pvalb	19.9485	other
Sst	13.7582	other
Pvalb	18.5363	other
Vip	11.8273	other
Sst	20.3025	other
Lamp5	8.49384	self
Pvalb	7.51134	other
Sst	20.6083	other
Sst	17.2333	other
Sst	11.1711	other
Lamp5	11.1526	other
Pvalb	15.594	other
Pvalb	14.7563	other
Sst	14.4649	other
Lamp5	7.0701	other
Sst	23.1987	other
Pvalb	12.5682	other
Pvalb	22.7374	other
Vip	16.0471	other
Sst	7.00933	self
Sst	20.1714	other
Lamp5	21.5129	other
Vip	10.351	other
Pvalb	14.7648	other
Sst	16.9092	other
Lamp5	7.65224	self
Sst	35.023	other
Pvalb	22.5847	other
Vip	22.3235	other
Pvalb	13.2804	other
Sst	12.2605	self
Sst	19.8243	other
Sst	6.4162	other
Sst	16.0937	other
Pvalb	15.0519	other
Pvalb	28.6341	other
Pvalb	16.8938	other
Pvalb	15.6627	other
Pvalb	13.8018	other
Vip	11.2333	other
Sst	18.2244	other
Pvalb	16.1605	other
Sst	16.0817	other
Lamp5	15.8015	other
Sst	17.4446	other
Sst	12.0261	other
Pvalb	21.9513	other
Vip	15.4357	other
Vip	10.7829	other
Lamp5	10.6068	other
Pvalb	12.1876	self
Sst	22.2144	other
Pvalb	13.9142	other
Pvalb	12.0365	other
Pvalb	17.3395	other
Vip	15.0519	other
Pvalb	8.6627	other
Pvalb	11.405	other
Pvalb	10.627	other
Lamp5	9.32596	self
Pvalb	14.6934	other
Sst	12.699	other
Lamp5	13.7566	other
Sst	17.0784	other
Sst	13.4488	other
Pvalb	10.0859	other
Pvalb	12.8903	other
Pvalb	7.63976	other
Sst	21.1059	other
Pvalb	9.173	other
Lamp5	10.6535	other
Pvalb	14.2139	other
Pvalb	15.0261	self
Sst	14.8409	other
Sst	10.8279	other
Vip	13.9961	other
Lamp5	17.2552	other
Sst	18.2101	other
Sst	18.2802	other
Sst	6.30321	self
Lamp5	17.2024	other
Sst	26.3576	other
Sst	20.3889	other
Sst	14.563	other
Sst	15.0115	other
Pvalb	14.7792	other
Pvalb	10.252	other
Pvalb	16.0722	other
Sst	11.422	other
Pvalb	24.914	other
Pvalb	13.5488	other
Sst	11.999	self
Pvalb	10.3691	other
Pvalb	16.017	other
Pvalb	8.47871	other
Vip	19.3499	other
Sst	12.0171	other
Pvalb	13.3282	other
Pvalb	13.8432	other
Pvalb	15.8594	other
Pvalb	13.1008	self
Sst	16.4975	other
Sst	15.7866	other
Sst	19.6788	other
Sst	16.4971	other
Pvalb	15.3686	other
Sst	10.9465	other
Sst	15.6707	other
Pvalb	16.7927	self
Sst	5.83261	self
Sst	16.391	other
Sst	5.41656	other
Vip	12.9413	other
Pvalb	18.9639	other
Vip	6.02106	other
Pvalb	14.2375	other
Sst	14.9717	other
Sst	19.1586	other
Sst	14.7412	other
Pvalb	15.9325	other
Pvalb	14.6741	other
Sst	14.1217	other
Sst	14.919	other
Sst	9.3786	self
Lamp5	10.3294	other
Sst	14.9776	other
Pvalb	14.6654	other
Sst	20.7453	other
Sst	10.054	other
Sst	7.89866	self
Sst	24.6785	other
Lamp5	13.4215	other
Sst	14.1417	other
Sst	9.99643	self
Pvalb	7.13253	other
Pvalb	13.0683	other
Pvalb	16.6927	other
Sst	13.2554	other
Pvalb	14.1284	other
Sst	15.3233	other
Sst	29.6338	other
Pvalb	18.4808	other
Sst	16.5424	other
Pvalb	21.7889	self
Sst	13.4237	other
Vip	18.3222	other
Pvalb	19.343	other
Sst	14.0879	other
Pvalb	14.8014	other
Pvalb	18.9258	other
Vip	12.4856	other
Pvalb	18.9467	other
Lamp5	7.05647	self
Sst	12.5272	other
Pvalb	12.8923	other
Pvalb	14.0097	other
Vip	11.9212	other
Sst	7.58684	self
Vip	19.605	other
Vip	12.5248	other
Sst	13.8498	other
Pvalb	12.8297	other
Lamp5	13.7309	other
Vip	16.1846	other
Sst	11.8986	other
Sst	22.0033	other
Sst	11.4094	other
Lamp5	10.1206	other
Pvalb	12.7952	other
Pvalb	15.8308	other
Pvalb	20.0229	other
Sst	10.7114	other
Pvalb	18.7505	other
Pvalb	11.488	other
Pvalb	19.5884	other
Sst	18.1629	other
Pvalb	15.028	other
Lamp5	8.57022	self
Lamp5	12.7075	other
Pvalb	13.8957	other
Sst	17.0697	other
Sst	20.5615	other
Vip	18.1831	other
Pvalb	19.04	other
Pvalb	15.5356	other
Pvalb	6.05702	other
Pvalb	11.7423	other
Lamp5	6.03879	self
Pvalb	10.211	other
Lamp5	5.90685	other
Sst	12.5101	other
Lamp5	12.8325	other
Vip	6.76435	other
Pvalb	15.6717	other
Sst	14.1619	other
Pvalb	5.7874	self
Sst	7.38042	other
Vip	21.4052	other
Vip	19.9954	other
Pvalb	14.5277	other
Vip	13.8785	other
Vip	24.7721	other
Pvalb	9.8948	other
Lamp5	5.44562	self
Sst	19.6159	other
Vip	14.0352	other
Sst	17.4987	other
Lamp5	13.5188	other
Pvalb	7.93433	other
Vip	9.03918	other
Lamp5	7.61519	self
Pvalb	14.2978	other
Pvalb	15.9159	other
Pvalb	15.453	other
Pvalb	13.4534	self
Sst	16.599	other
Pvalb	14.6399	other
Pvalb	12.3685	other
Pvalb	10.2424	other
Pvalb	20.2432	other
Lamp5	17.7459	other
Pvalb	17.4791	other
Pvalb	10.0024	other
Vip	20.4824	other
Sst	19.4261	other
Vip	22.9622	other
Pvalb	11.4561	other
Sst	12.2659	other
Pvalb	12.0314	other
Pvalb	9.68127	other
Pvalb	20.4889	other
Sst	17.9938	other
Vip	14.4878	other
Sst	20.667	other
Lamp5	18.7004	other
Sst	17.6924	other
Pvalb	16.3819	other
Sst	14.6271	other
Lamp5	16.5265	other
Sst	13.5451	self
Sst	17.3455	other
Pvalb	14.4468	other
Pvalb	21.3519	other
Pvalb	9.7437	other
Sst	18.2545	other
Sst	10.7405	self
Pvalb	12.8647	other
Pvalb	12.09	other
Pvalb	12.0186	other
Pvalb	9.54771	other
Sst	13.3899	self
Pvalb	13.2057	other
Pvalb	24.0453	other
Lamp5	11.1762	other
Pvalb	7.64816	other
Vip	18.0599	other
Pvalb	12.394	other
Lamp5	14.6264	other
Pvalb	25.1657	other
Sst	11.4579	other
Sst	8.15625	self
Pvalb	16.0984	other
Pvalb	9.46053	other
Pvalb	14.8168	other
Vip	16.2228	other
Sst	16.6365	other
Sst	13.4805	other
Pvalb	13.6735	other
Pvalb	6.77204	self
Pvalb	14.4205	other
Pvalb	10.5731	other
Lamp5	10.3858	other
Sst	15.1219	other
Lamp5	13.6841	other
Lamp5	12.304	other
Sst	21.0587	other
Vip	5.93535	other
Pvalb	11.4468	other
Lamp5	15.9976	other
Pvalb	11.0449	other
Pvalb	17.3652	self
Sst	15.3903	other
Lamp5	9.63332	other
Pvalb	15.5487	other
Vip	12.6155	self
Sst	11.2879	other
Lamp5	8.628	self
Pvalb	13.8573	other
Pvalb	11.9936	self
Sst	18.8077	other
Pvalb	10.9285	other
Pvalb	17.4375	other
Pvalb	12.9126	other
Sst	15.0875	other
Vip	26.8381	other
Pvalb	14.6074	other
Pvalb	13.2341	self
Pvalb	15.832	other
Pvalb	14.688	other
Sst	16.8318	other
Pvalb	13.0368	other
Pvalb	11.6888	other
Pvalb	15.6269	self
Pvalb	10.2379	other
Sst	24.2229	other
Pvalb	16.2392	other
Sst	15.1815	other
Sst	18.8704	other
Pvalb	19.3237	other
Sst	20.9872	other
Pvalb	17.0163	other
Vip	7.93862	self
Pvalb	13.5115	other
Pvalb	8.89483	other
Pvalb	5.0164	self
Pvalb	14.238	other
Sst	17.9031	other
Vip	17.7529	other
Sst	17.2291	other
Vip	8.14023	other
Sst	13.5975	self
Pvalb	14.0844	other
Pvalb	15.8082	other
Pvalb	24.2324	other
Pvalb	16.8133	other
Vip	10.1361	other
Pvalb	13.3334	other
Vip	11.7975	other
Sst	19.6241	other
Vip	9.92335	other
Vip	12.8876	other
Vip	21.2196	other
Lamp5	17.6116	other
Sst	16.4887	other
Pvalb	16.0137	other
Pvalb	17.7109	other
Pvalb	13.3673	other
Sst	19.6773	self
Vip	14.4541	other
Vip	7.70846	other
Pvalb	15.7054	other
Pvalb	14.2676	other
Sst	13.6542	other
Sst	19.961	other
Lamp5	14.4791	other
Sst	5.392	self
Pvalb	21.3345	self
Pvalb	10.018	other
Pvalb	13.29	other
Sst	17.0024	other
Pvalb	13.1872	other
Sst	8.82125	other
Pvalb	22.2925	other
Vip	8.12586	other
Vip	8.34195	other
Pvalb	17.4693	other
Pvalb	8.3413	other
Pvalb	16.1988	other
Pvalb	13.3989	other
Sst	12.9784	self
Sst	18.0463	other
Vip	10.5061	other
Pvalb	13.0139	other
Pvalb	9.28892	other
Sst	9.59497	other
Pvalb	14.3574	other
Sst	8.95207	self
Vip	13.6359	other
Pvalb	16.091	other
Sst	19.644	other
Pvalb	10.685	other
Sst	20.8845	other
Vip	11.496	other
Sst	14.4359	other
Pvalb	20.6768	other
Pvalb	14.8939	other
Pvalb	15.6992	other
Pvalb	11.2361	other
Sst	5.62739	other
Vip	22.0457	other
Pvalb	13.3435	other
Sst	9.18848	other
Pvalb	15.3981	self
Pvalb	9.19629	other
Sst	14.5717	other
Pvalb	10.3163	other
Sst	9.90111	other
Pvalb	13.0943	other
Sst	13.9579	other
Pvalb	13.5384	other
Pvalb	18.0644	other
Pvalb	13.8695	other
Vip	12.3953	other
Pvalb	13.1477	other
Sst	9.12329	other
Sst	14.7439	other
Vip	8.14146	self
Pvalb	15.8721	other
Pvalb	22.4436	other
Vip	17.3374	other
Pvalb	6.66712	other
Lamp5	7.18452	other
Lamp5	9.99843	other
Sst	9.23695	other
Pvalb	17.5703	self
Sst	17.6811	other
Lamp5	8.57022	self
Sst	14.8279	other
Pvalb	13.2277	other
Pvalb	19.9655	other
Vip	16.0226	other
Sst	18.6526	other
Pvalb	5.07152	self
Sst	26.1634	other
Vip	22.4727	other
Sst	9.08547	self
Pvalb	17.0689	other
Pvalb	14.961	other
Lamp5	14.3968	other
Sst	14.0211	other
Pvalb	12.1817	other
Vip	20.7187	other
Sst	21.5062	other
Pvalb	5.9037	self
Pvalb	11.8289	other
Pvalb	9.13471	self
Vip	12.0595	other
Pvalb	14.9094	other
Pvalb	19.3414	other
Pvalb	20.2175	other
Sst	20.4195	other
Vip	8.67153	other
Pvalb	10.139	other
Pvalb	19.2842	other
Vip	13.4921	other
Pvalb	11.8087	other
Pvalb	11.9566	other
Pvalb	12.109	other
Sst	13.8228	other
Lamp5	10.7341	other
Pvalb	18.338	other
Pvalb	17.7919	other
Pvalb	16.6199	other
Pvalb	15.7064	other
Lamp5	10.4037	other
Pvalb	13.9674	other
Pvalb	13.402	other
Vip	16.9316	other
Vip	19.2402	other
Pvalb	22.4825	other
Sst	21.7842	other
Pvalb	17.9431	other
Vip	6.32933	self
Sst	17.9592	other
Vip	6.92926	other
Pvalb	12.3247	other
Pvalb	29.2552	other
Sst	9.93769	other
Sst	18.2126	other
Lamp5	8.49384	self
Pvalb	20.8535	other
Vip	14.2085	other
Lamp5	7.75677	self
Sst	11.7886	self
Sst	11.3135	other
Pvalb	12.2895	other
Sst	20.0164	other
Sst	13.1296	other
Pvalb	19.7529	other
Sst	17.5986	other
Pvalb	10.8077	other
Pvalb	10.8479	self
Pvalb	10.6693	other
Sst	10.8762	other
Sst	18.1466	other
Vip	10.4561	other
Sst	9.56038	other
Sst	19.2483	other
Pvalb	18.3241	other
Lamp5	13.5847	other
Pvalb	13.4814	other
Pvalb	10.7616	other
Sst	14.3317	other
Pvalb	8.18372	other
Sst	11.1832	other
Pvalb	17.2693	other
Lamp5	9.23695	other
Lamp5	12.2105	other
Pvalb	10.4526	other
Vip	12.1567	other
Sst	15.0755	other
Pvalb	5.69484	self
Pvalb	11.9258	other
Vip	13.751	other
Pvalb	18.1564	other
Sst	13.0094	other
Lamp5	13.7673	other
Pvalb	14.2216	other
Lamp5	8.628	self
Pvalb	14.4409	self
Pvalb	11.5223	other
Pvalb	9.26442	other
Sst	15.2156	other
Pvalb	13.9452	other
Sst	15.8311	other
Lamp5	12.0481	other
Vip	13.4235	other
Pvalb	14.4021	other
Pvalb	10.9914	other
Vip	17.9879	other
Sst	12.9353	other
Sst	19.4246	other
Pvalb	14.2551	other
Pvalb	12.7841	other
Vip	11.3749	other
Sst	14.7846	other
Sst	13.6924	other
Pvalb	11.4071	other
Pvalb	13.982	other
Pvalb	11.2667	other
Sst	16.3728	other
Pvalb	27.3551	other
Sst	13.098	other
Pvalb	14.788	other
Pvalb	12.167	other
Vip	10.063	other
Vip	8.50764	other
Pvalb	17.8206	other
Lamp5	14.6074	other
Lamp5	14.7554	other
Pvalb	13.1067	other
Pvalb	20.0357	other
Pvalb	12.6334	other
Vip	15.8464	other
Pvalb	8.12182	other
Sst	17.63	other
Sst	20.5359	other
Pvalb	24.4906	other
Pvalb	12.3935	other
Sst	15.2526	other
Lamp5	14.643	other
Pvalb	11.0866	other
Lamp5	18.8879	other
Sst	11.0203	other
Pvalb	14.6939	other
Pvalb	10.5861	other
Sst	11.2534	other
Sst	20.5237	other
Sst	12.6599	self
Pvalb	25.6401	other
Pvalb	10.1274	other
Sst	18.159	other
Pvalb	19.3211	other
Sst	13.1082	other
Pvalb	16.9849	other
Sst	11.8474	other
Sst	10.9744	other
Sst	16.091	other
Vip	10.2224	other
Pvalb	19.6394	other
Pvalb	12.9785	other
Pvalb	15.3899	other
Vip	12.1115	other
Pvalb	18.183	other
Lamp5	13.4888	other
Pvalb	12.719	other
Sst	16.709	other
Pvalb	16.7905	other
Pvalb	24.4624	other
Lamp5	16.2132	other
Pvalb	21.8422	other
Pvalb	9.53959	other
Sst	16.0157	other
Sst	18.6506	other
Sst	10.2605	other
Lamp5	17.1881	other
Sst	11.7868	other
Sst	14.3719	other
Pvalb	16.1554	other
Sst	21.5105	other
Sst	11.4719	other
Lamp5	8.85592	other
Lamp5	14.3806	other
Vip	16.4719	other
Sst	9.92335	other
Pvalb	15.2871	other
Sst	15.4471	other
Sst	15.0288	other
Vip	6.21064	other
Sst	13.7857	other
Pvalb	17.5075	other
Sst	15.173	other
Vip	8.14146	self
Pvalb	12.6016	other
Pvalb	22.5862	other
Vip	11.5738	other
Sst	11.6836	other
Vip	17.3138	other
Pvalb	20.747	other
Vip	22.319	other
Sst	13.352	other
Pvalb	10.5503	other
Pvalb	17.5684	other
Lamp5	6.31241	self
Pvalb	21.4267	other
Pvalb	13.4534	self
Sst	18.8846	other
Lamp5	11.4872	other
Pvalb	14.7828	other
Pvalb	16.9266	other
Pvalb	24.5491	other
Sst	16.464	other
Pvalb	12.6843	other
Lamp5	14.6092	other
Sst	8.15625	self
Sst	12.394	other
Sst	9.99643	self
Pvalb	16.6984	self
Vip	18.6745	other
Sst	18.206	other
Pvalb	13.8797	other
Pvalb	5.50323	self
Sst	15.691	self
Sst	13.1127	other
Pvalb	11.684	other
Vip	19.9776	other
Vip	13.9697	other
Sst	21.2087	other
Sst	11.041	other
Pvalb	16.2868	self
Pvalb	23.3636	other
Sst	13.7717	self
Sst	7.87267	self
Lamp5	6.12682	self
Pvalb	16.3963	other
Pvalb	11.2875	self
Sst	10.0081	other
Pvalb	8.20696	other
Lamp5	25.745	other
Pvalb	14.8572	other
Pvalb	23.7341	other
Pvalb	13.9084	other
Vip	10.6752	other
Pvalb	15.4809	other
Sst	16.8668	other
Lamp5	16.9221	other
Sst	17.5145	other
Lamp5	23.5999	other
Pvalb	18.0196	other
Lamp5	14.0078	other
Vip	19.0079	other
Pvalb	14.5492	other
Lamp5	14.483	other
Pvalb	21.7828	other
Sst	10.7257	other
Pvalb	8.68681	other
Sst	19.166	other
Lamp5	16.8224	other
Vip	6.43574	self
Vip	16.461	other
Sst	16.8155	other
Lamp5	8.13235	self
Sst	6.88492	self
Pvalb	20.237	other
Pvalb	10.8479	self
Pvalb	16.9026	self
Pvalb	15.6703	other
Sst	10.3288	self
Lamp5	16.1342	other
Lamp5	14.5975	other
Sst	17.9887	other
Pvalb	13.1409	other
Pvalb	25.9796	self
Sst	14.933	other
Sst	6.01885	self
Vip	10.6562	other
Vip	15.867	other
Pvalb	10.4907	other
Sst	20.1307	other
Vip	7.9177	self
Vip	15.3719	other
Pvalb	13.853	other
Sst	10.2424	other
Pvalb	13.35	other
Pvalb	19.3216	other
Pvalb	17.236	other
Sst	17.2608	other
Pvalb	20.5398	other
Pvalb	9.38852	other
Vip	10.7869	other
Pvalb	10.82	other
Sst	11.8545	self
Pvalb	22.3887	other
Lamp5	17.761	other
Pvalb	17.462	other
Sst	12.8356	other
Pvalb	13.9077	self
Sst	12.2295	other
Vip	22.4737	other
Lamp5	13.0592	other
Sst	17.6982	other
Pvalb	9.29131	other
Vip	13.9776	other
Pvalb	17.2943	other
Pvalb	6.49481	self
Sst	14.2444	other
Sst	14.3822	other
Pvalb	18.5043	other
Pvalb	16.321	other
Sst	19.933	other
Lamp5	15.2012	other
Pvalb	12.0981	other
Sst	20.3094	other
Pvalb	8.29416	other
Pvalb	16.9419	other
Pvalb	15.5971	other
Sst	7.04386	self
Pvalb	15.795	other
Pvalb	6.96455	other
Sst	26.8194	other
Vip	10.5635	other
Vip	13.1823	other
Pvalb	12.6309	other
Sst	17.1354	other
Pvalb	12.014	self
Sst	7.17596	self
Pvalb	16.0022	other
Vip	10.3135	other
Lamp5	15.2335	other
Sst	15.8965	other
Pvalb	14.9057	other
Sst	23.9472	other
Vip	7.47414	self
Sst	21.2284	other
Sst	23.5817	other
Sst	18.4949	self
Pvalb	12.1772	other
Pvalb	13.7191	other
Sst	16.5419	other
Lamp5	16.0396	other
Pvalb	12.8509	other
Pvalb	15.9214	other
Vip	16.1988	other
Pvalb	24.0061	other
Pvalb	14.8471	other
Pvalb	11.4896	other
Sst	10.9056	self
Pvalb	5.7874	self
Pvalb	23.0521	other
Pvalb	12.3061	other
Pvalb	15.2226	other
Sst	11.7059	other
Sst	15.4066	other
Sst	17.8931	other
Pvalb	20.4306	other
Sst	16.1762	other
Vip	10.4205	other
Pvalb	9.76939	other
Sst	22.6953	other
Sst	10.3288	self
Sst	13.5089	other
Sst	13.2065	other
Sst	13.836	other
Vip	14.1913	other
Lamp5	8.64183	other
Pvalb	14.881	other
Pvalb	15.8032	other
Sst	15.5644	other
Pvalb	14.1424	other
Pvalb	12.0401	other
Lamp5	10.7933	other
Pvalb	14.8887	other
Sst	9.3786	self
Pvalb	17.7876	other
Pvalb	10.1006	other
Lamp5	9.15429	other
Pvalb	5.55546	self
Pvalb	12.727	other
Sst	11.9458	self
Sst	10.0082	other
Pvalb	15.5029	other
Sst	16.7837	other
Pvalb	14.8327	other
Vip	7.9177	self
Sst	10.8171	other
Sst	10.8384	other
Lamp5	19.3121	other
Sst	15.7489	other
Pvalb	13.5847	other
Vip	17.5675	other
Sst	10.1092	other
Pvalb	11.4179	other
Sst	10.8139	self
Pvalb	15.3073	other
Pvalb	13.0238	other
Vip	7.99169	other
Pvalb	22.7702	other
Pvalb	14.0966	other
Sst	12.9853	other
Sst	14.0943	other
Lamp5	11.4879	other
Sst	21.1451	other
Pvalb	15.2149	self
Pvalb	15.4135	other
Sst	17.1469	other
Sst	19.9983	other
Sst	13.3966	other
Vip	14.1372	self
Pvalb	18.683	other
Pvalb	8.85157	other
Lamp5	11.5426	other
Pvalb	11.8778	other
Vip	13.9849	other
Sst	20.1703	other
Lamp5	11.2739	other
Pvalb	14.326	other
Vip	15.2685	other
Sst	17.2151	other
Sst	6.23975	self
Vip	11.5843	other
Pvalb	15.1444	other
Pvalb	19.6494	other
Sst	13.5352	other
Pvalb	9.05887	other
Sst	13.0262	other
Pvalb	16.7156	other
Sst	20.0597	other
Pvalb	26.0551	other
Lamp5	10.2916	other
Sst	11.0013	other
Pvalb	16.5419	other
Pvalb	12.6017	other
Vip	11.6098	other
Pvalb	21.0382	other
Pvalb	15.6926	other
Sst	12.8267	other
Pvalb	16.0356	other
Sst	20.6153	other
Sst	13.033	other
Sst	19.723	other
Pvalb	13.6095	other
Pvalb	7.56163	self
Sst	16.0744	other
Pvalb	15.5446	other
Pvalb	15.4718	other
Lamp5	15.0467	other
Pvalb	9.14167	other
Pvalb	13.0594	other
Sst	9.16737	other
Pvalb	15.3608	other
Pvalb	17.5172	other
Pvalb	13.0173	other
Sst	20.7056	other
Vip	12.1666	other
Sst	16.3055	other
Lamp5	5.44562	self
Pvalb	15.2171	other
Sst	15.7884	other
Pvalb	8.41599	self
Sst	15.9113	other
Pvalb	11.7578	self
Pvalb	13.7104	other
Pvalb	18.8903	other
Sst	22.2361	other
Sst	10.1665	other
Pvalb	18.7541	other
Pvalb	18.4066	other
Pvalb	7.91062	other
Vip	13.772	other
Pvalb	15.5341	other
Pvalb	9.96783	other
Pvalb	22.3177	other
Sst	13.5479	other
Sst	7.25266	self
Pvalb	18.4926	other
Pvalb	15.7784	other
Pvalb	15.9679	other
Sst	11.9458	self
Pvalb	9.58144	other
Lamp5	12.8491	other
Pvalb	18.0808	other
Sst	15.7913	other
Pvalb	13.1695	other
Lamp5	16.4094	other
Pvalb	18.9004	other
Sst	15.691	self
Sst	15.3004	other
Pvalb	17.9137	other
Sst	16.2602	other
Sst	10.726	other
Pvalb	22.7029	other
Vip	13.1473	other
Pvalb	13.067	other
Lamp5	10.5045	other
Pvalb	16.4469	other
Sst	25.6122	other
Pvalb	15.9382	other
Sst	13.7569	other
Vip	10.9634	other
Pvalb	9.14167	other
Pvalb	13.6888	other
Vip	8.12339	other
Pvalb	13.9122	other
Sst	12.9074	other
Vip	10.18	other
Pvalb	12.6552	other
Sst	15.6865	other
Pvalb	15.1748	other
Pvalb	15.4827	other
Pvalb	6.28363	self
Vip	8.37213	other
Sst	17.8486	other
Pvalb	21.0123	other
Pvalb	16.5141	other
Lamp5	6.31241	self
Vip	14.1372	self
Sst	7.00933	self
Pvalb	13.8437	other
Pvalb	15.7625	other
Sst	21.162	other
Sst	13.4876	other
Sst	15.7681	other
Sst	13.9373	other
Vip	10.6572	other
Sst	14.2786	other
Sst	12.454	other
Pvalb	16.7515	other
Pvalb	17.5788	self
Lamp5	8.46389	other
Sst	11.6329	other
Sst	19.6353	other
Pvalb	11.2819	other
Pvalb	22.4251	self
Vip	18.5444	other
Lamp5	18.83	other
Pvalb	13.0935	other
Pvalb	16.2387	other
Pvalb	11.8947	other
Lamp5	8.84957	self
Pvalb	16.0615	other
Pvalb	11.9158	other
Pvalb	14.6965	other
Vip	6.43574	self
Pvalb	12.4987	other
Vip	5.04125	self
Pvalb	19.5666	other
Sst	13.6791	other
Pvalb	16.9026	self
Pvalb	17.5987	other
Pvalb	24.252	other
Sst	19.7642	other
Pvalb	5.66978	self
Pvalb	14.536	other
Sst	17.9204	other
Sst	7.9017	self
Sst	29.7707	other
Pvalb	14.8078	other
Sst	16.6105	other
Pvalb	11.8986	other
Sst	11.2178	other
Pvalb	14.8931	other
Sst	16.4822	other
Pvalb	13.2819	other
Sst	18.4487	other
Pvalb	10.0832	other
Pvalb	13.3144	other
Pvalb	12.1591	other
Pvalb	16.8818	other
Vip	15.7234	other
Sst	14.6923	other
Pvalb	16.681	other
Vip	11.903	other
Sst	11.635	other
Lamp5	14.6031	other
Pvalb	14.933	other
Pvalb	20.4156	other
Vip	13.6183	other
Pvalb	11.951	other
Sst	10.4842	other
Sst	27.0996	other
Sst	13.9143	other
Pvalb	14.0412	other
Pvalb	11.3089	other
Sst	16.9973	other
Pvalb	8.25495	other
Vip	16.9694	other
Sst	17.3315	other
Sst	21.8175	other
Sst	16.6468	other
Pvalb	10.2093	other
Sst	10.7163	other
Sst	23.1874	other
Sst	15.5493	other
Sst	16.2652	other
Pvalb	14.2856	other
Sst	16.2531	other
Sst	18.5334	other
Pvalb	18.6755	other
Pvalb	10.9941	other
Pvalb	16.9837	other
Pvalb	11.6025	other
Lamp5	8.97188	other
Sst	16.891	other
Vip	9.90297	other
Pvalb	21.3963	other
Vip	16.301	other
Sst	11.546	other
Pvalb	19.291	other
Sst	16.8375	other
Sst	25.7604	other
Pvalb	10.2067	other
Pvalb	10.6472	other
Sst	11.0499	self
Sst	10.7689	other
Pvalb	14.4621	other
Sst	5.91084	self
Sst	14.8856	other
Pvalb	11.5077	other
Sst	14.6967	other
Sst	12.3632	other
Pvalb	17.6229	other
Pvalb	16.1687	other
Pvalb	8.60636	other
Vip	12.2641	other
Vip	10.4625	other
Pvalb	12.1082	other
Sst	11.407	other
Pvalb	17.6809	other
Pvalb	6.35611	other
Pvalb	15.1651	other
Sst	11.5355	other
Sst	9.14712	other
Pvalb	10.2732	other
Lamp5	14.4021	other
Sst	18.4986	other
Pvalb	10.3871	other
Sst	15.2419	self
Pvalb	11.6974	other
Sst	24.7471	other
Sst	16.9736	other
Sst	14.8841	other
Pvalb	16.313	other
Pvalb	14.2252	other
Sst	14.1864	other
Sst	15.3102	other
Sst	11.3504	other
Sst	11.0663	self
Sst	12.831	other
Pvalb	12.9022	other
Sst	17.1619	other
Pvalb	14.7503	other
Pvalb	21.7065	other
Pvalb	8.93266	other
Pvalb	17.3815	other
Sst	11.3838	other
Vip	8.19101	other
Pvalb	15.5574	self
Sst	24.6219	other
Sst	13.0754	other
Vip	9.61175	other
Sst	20.1445	other
Lamp5	11.0072	other
Pvalb	14.5236	other
Pvalb	17.6057	other
Pvalb	17.9487	other
Pvalb	13.3069	other
Pvalb	12.6713	other
Vip	13.8533	other
Pvalb	13.7772	other
Pvalb	17.9899	other
Sst	12.3596	other
Lamp5	10.11	other
Vip	16.8253	other
Sst	11.645	other
Pvalb	10.2424	other
Pvalb	13.9466	other
Lamp5	10.2452	other
Sst	14.1031	other
Pvalb	11.2482	other
Pvalb	9.30039	other
Sst	19.1865	other
Pvalb	18.4339	other
Sst	17.2709	other
Pvalb	11.1496	other
Pvalb	11.9646	other
Lamp5	11.9963	other
Sst	13.4648	other
Pvalb	11.6139	other
Lamp5	11.4123	other
Lamp5	10.9663	other
Pvalb	18.5111	other
Pvalb	14.0078	other
Pvalb	16.3892	other
Sst	16.1005	other
Lamp5	21.6061	other
Pvalb	10.1357	other
Vip	11.7157	other
Vip	12.5928	other
Pvalb	5.66978	self
Pvalb	10.8384	other
Pvalb	16.2565	other
Pvalb	16.9748	other
Lamp5	17.4504	other
Lamp5	9.99517	self
Sst	11.6875	other
Vip	10.9862	other
Sst	18.2841	other
Sst	19.5729	other
Sst	16.3968	other
Pvalb	15.9013	other
Pvalb	21.0582	other
Pvalb	17.5431	other
Sst	6.36019	self
Vip	21.7942	other
Lamp5	21.8143	other
Pvalb	18.1025	other
Pvalb	15.3595	other
Lamp5	8.67452	self
Pvalb	13.7039	other
Lamp5	9.56171	other
Sst	9.94307	other
Vip	14.8673	other
Pvalb	19.6406	other
Sst	10.0671	other
Pvalb	20.9256	self
Pvalb	16.253	other
Pvalb	10.9408	other
Pvalb	7.84958	other
Sst	7.43677	other
Pvalb	13.3404	other
Sst	21.9608	other
Lamp5	9.96985	other
Pvalb	16.0739	other
Pvalb	20.7416	other
Pvalb	18.3253	other
Lamp5	12.6451	other
Pvalb	7.74986	other
Vip	9.69619	other
Sst	14.2944	other
Lamp5	10.7211	other
Pvalb	13.8695	other
Pvalb	13.4757	other
Sst	13.3698	other
Pvalb	15.4384	other
Pvalb	17.7871	other
Pvalb	8.69093	other
Pvalb	19.1375	other
Sst	17.4863	other
Sst	11.5614	other
Pvalb	16.7837	other
Pvalb	15.1255	other
Pvalb	9.61938	other
Vip	20.085	other
Pvalb	19.8014	other
Sst	6.31633	self
Sst	13.6436	other
Pvalb	19.7933	other
Vip	16.3443	other
Pvalb	21.0807	other
Pvalb	16.9092	other
Pvalb	13.6588	other
Pvalb	17.9203	other
Vip	8.97188	other
Pvalb	17.1376	other
Lamp5	14.3961	other
Pvalb	15.0956	other
Pvalb	14.3427	other
Pvalb	14.8188	other
Vip	13.8012	other
Sst	11.0404	self
Sst	9.9261	other
Pvalb	11.9366	other
Vip	13.9434	other
Sst	10.1901	other
Pvalb	15.6817	other
Sst	12.7995	other
Pvalb	18.0221	other
Pvalb	7.56163	self
Sst	10.8002	self
Pvalb	16.4787	other
Sst	17.2167	other
Sst	8.12182	other
Pvalb	21.1591	other
Pvalb	12.0758	other
Vip	19.107	other
Pvalb	14.5388	other
Lamp5	9.99517	self
Pvalb	11.1414	self
Pvalb	8.59467	other
Vip	15.5185	other
Pvalb	16.5195	other
Pvalb	16.0951	other
Pvalb	12.876	other
Pvalb	14.4476	other
Lamp5	17.2013	other
Pvalb	13.8718	other
Pvalb	16.1169	other
Pvalb	14.1693	other
Vip	12.701	other
Pvalb	21.2774	other
Sst	12.1323	other
Pvalb	23.434	other
Sst	16.9023	other
Sst	16.7758	other
Pvalb	9.08858	other
Pvalb	17.667	other
Sst	15.5124	other
Sst	9.73617	other
Pvalb	19.7665	other
Sst	15.2522	other
Vip	7.93862	self
Pvalb	5.82932	other
Pvalb	9.97204	other
Sst	13.5451	self
Pvalb	19.6074	other
Vip	18.3702	other
Pvalb	12.8275	other
Sst	16.0925	other
Pvalb	12.1876	self
Pvalb	13.2328	other
Sst	13.5276	self
Sst	10.8236	other
Lamp5	13.5401	other
Sst	12.5023	other
Sst	13.9536	other
Pvalb	16.9221	other
Lamp5	10.9957	other
Pvalb	10.4048	other
Lamp5	32.0981	other
Sst	16.3717	other
Sst	15.3174	other
Pvalb	20.0449	other
Sst	20.288	other
Vip	11.9718	other
Sst	14.4378	other
Pvalb	13.6642	other
Sst	28.6438	other
Pvalb	15.1492	other
Pvalb	11.4544	other
Vip	7.47414	self
Vip	8.72247	other
Lamp5	6.70554	self
Pvalb	9.15429	other
Pvalb	16.6579	other
Sst	14.3365	other
Vip	8.93707	other
Pvalb	19.7115	other
Sst	11.3101	other
Pvalb	24.6024	other
Sst	23.2591	other
Pvalb	7.10369	self
Lamp5	7.61519	self
Pvalb	11.7038	other
Pvalb	18.5476	other
Sst	14.8092	other
Vip	17.7198	self
Lamp5	19.0625	other
Lamp5	12.5844	other
Pvalb	8.88202	other
Vip	16.4997	other
Sst	13.0616	other
Pvalb	15.1513	other
Sst	9.35421	self
Sst	9.46453	other
Pvalb	11.88	other
Pvalb	11.5476	other
Pvalb	12.9702	other
Vip	12.6836	other
Sst	21.2185	other
Pvalb	7.45843	other
Sst	18.0484	other
Sst	9.36456	other
Lamp5	6.79238	other
Pvalb	13.4768	other
Pvalb	15.7026	other
Sst	15.4827	other
Sst	15.9405	other
Pvalb	11.5602	other
Lamp5	14.9963	other
Pvalb	11.3392	other
Sst	10.9216	other
Pvalb	14.7475	self
Sst	15.7506	other
Sst	6.00757	other
Pvalb	5.0164	self
Sst	15.9227	other
Pvalb	18.123	other
Sst	6.31633	self
Pvalb	13.2945	other
Pvalb	18.5602	other
Sst	16.7986	other
Vip	11.5925	other
Sst	16.681	other
Vip	15.1227	other
Pvalb	22.1067	other
Pvalb	9.67019	other
Lamp5	24.3625	other
Lamp5	9.29263	other
Sst	13.1705	other
Pvalb	15.3313	other
Lamp5	14.2984	other
Sst	13.9134	other
Sst	10.8002	self
Vip	17.2964	other
Lamp5	16.826	other
Vip	16.4564	other
Pvalb	10.3469	other
Pvalb	17.3015	other
Pvalb	15.7829	other
Pvalb	17.5487	other
Vip	16.2052	other
Sst	21.1158	other
Pvalb	11.8732	other
Pvalb	13.5577	other
Pvalb	14.5496	other
Vip	21.5506	other
Pvalb	10.796	other
Vip	13.381	other
Sst	13.6094	other
Sst	22.3383	other
Lamp5	18.6556	other
Pvalb	11.6762	other
Vip	14.1746	other
Pvalb	24.2494	other
Pvalb	13.4729	other
Sst	10.9056	self
Lamp5	18.7203	other
Vip	9.80963	other
Pvalb	19.1513	other
Pvalb	12.7845	other
Pvalb	10.6725	other
Sst	27.1657	other
Lamp5	20.7078	other
Pvalb	11.1306	other
Pvalb	12.6065	other
Pvalb	13.9582	other
Lamp5	12.306	other
Lamp5	6.70554	self
Vip	20.0566	other
Lamp5	14.2251	other
Pvalb	16.6815	other
Vip	14.3427	other
Lamp5	15.4586	other
Pvalb	16.0193	other
Pvalb	15.2523	other
Sst	10.399	other
Pvalb	8.69595	other
Pvalb	16.1878	other
Lamp5	16.9267	other
Lamp5	12.763	other
Sst	7.67255	self
Sst	12.8735	other
Lamp5	18.1384	other
Pvalb	16.2945	other
Lamp5	14.7963	other
Pvalb	7.10369	self
Vip	11.0454	other
Sst	10.1374	other
Sst	8.25282	other
Vip	14.7953	other
Pvalb	14.3635	other
Sst	9.12253	other
Vip	19.9428	other
Pvalb	9.93962	other
Pvalb	12.0749	other
Sst	45.864	other
Lamp5	6.12682	self
Sst	9.04883	other
Pvalb	14.1956	other
Lamp5	12.8292	other
Sst	17.6186	other
Sst	11.401	other
Pvalb	11.6508	other
Sst	13.4686	other
Vip	13.3623	other
Pvalb	12.2322	other
Pvalb	12.1502	other
Vip	11.4115	other
Vip	17.3081	other
Pvalb	9.01301	other
Sst	10.6934	other
Pvalb	15.8212	other
Pvalb	18.7353	other
Pvalb	17.5433	other
Vip	10.4445	other
Sst	15.0547	other
Pvalb	15.0298	other
Pvalb	18.5953	other
Sst	19.2545	other
Sst	17.4931	other
Pvalb	17.0866	other
Vip	16.8509	other
Vip	13.1993	other
Sst	10.7063	other
Pvalb	11.6432	self
Pvalb	15.2149	self
Sst	17.3827	other
Sst	13.1666	other
Pvalb	11.2408	other
Lamp5	9.32272	other
Pvalb	13.6479	other
Pvalb	22.9004	other
Lamp5	13.4083	other
Pvalb	13.1573	other
Pvalb	11.9462	other
Sst	14.0496	other
Lamp5	16.8456	other
Vip	10.7464	other
Pvalb	21.7531	other
Pvalb	11.3035	other
Pvalb	13.2495	other
Sst	12.2565	other
Pvalb	14.4576	other
Sst	8.84876	other
Pvalb	19.6084	other
Vip	12.3724	other
Pvalb	15.2813	other
Sst	17.3573	other
Pvalb	11.4796	other
Lamp5	11.6824	other
Sst	11.5627	other
Vip	7.96189	other
Sst	10.1598	other
Sst	13.5228	other
Pvalb	20.4872	other
Pvalb	17.4913	other
Sst	6.09401	other
Sst	15.0984	other
Vip	8.57155	other
Lamp5	9.32973	other
Vip	22.2375	other
Pvalb	8.29011	other
Pvalb	13.9939	other
Sst	14.1808	other
Sst	14.8168	other
Lamp5	19.2477	other
Pvalb	23.2685	other
Pvalb	10.5951	other
Pvalb	20.5304	other
Pvalb	11.7439	other
Pvalb	15.2282	other
Sst	13.9826	other
Pvalb	13.4929	other
Sst	21.0019	other
Sst	16.9985	other
Sst	14.7451	other
Sst	19.9369	other
Sst	7.87173	self
Lamp5	13.3642	other
Pvalb	21.4186	other
Sst	15.7255	other
Sst	10.5743	other
Pvalb	14.2674	other
Sst	8.72543	other
Pvalb	13.1765	self
Pvalb	15.7062	other
Sst	15.3309	other
Sst	15.9241	other
Pvalb	13.2951	other
Sst	13.7717	self
Pvalb	23.5896	other
Pvalb	14.9473	other
Sst	9.6658	other
Vip	17.3557	other
Vip	14.9415	other
Lamp5	14.5391	other
Sst	14.489	other
Pvalb	17.5873	other
Sst	15.795	other
Pvalb	23.6682	other
Lamp5	18.2628	other
Sst	12.5374	other
Lamp5	19.0665	other
Pvalb	11.6708	other
Pvalb	13.6381	other
Sst	13.4515	other
Vip	9.10757	other
Pvalb	5.91533	self
Sst	16.1922	other
Pvalb	16.3866	other
Sst	13.9427	other
Pvalb	17.6272	other
Pvalb	13.1294	other
Sst	15.244	other
Sst	26.1729	other
Sst	18.8961	other
Pvalb	17.9945	other
Vip	13.1294	other
Pvalb	5.91533	self
Vip	6.33566	other
Pvalb	6.84107	self
Sst	18.4949	self
[truncated: 894 more rows]

## Sheet: Figure 3f
nearest neighbor distance (um)
22.8242
34.5446
40.6716
7.17596
21.2745
39.2067
5.16452
25.9138
26.254
44.8694
22.8555
32.913
29.7921
14.6501
33.5429
28.0873
27.9105
24.0102
27.1257
20.9261
42.5957
18.2197
10.517
36.0528
43.4412
32.0523
16.4023
37.1505
34.0717
15.3056
39.6065
20.3377
36.764
13.7478
14.5191
32.9064
36.2066
34.4574
37.064
13.0508
30.6182
24.5838
25.2987
19.6142
26.9998
24.2696
5.31202
35.5981
22.1772
13.8903
14.0352
26.2377
21.5476
45.714
28.2849
21.2989
4.55539
45.9032
33.1846
16.2591
14.5102
11.4816
32.1158
44.3031
39.4721
18.8508
26.1392
8.67452
16.3034
27.7471
12.6552
28.5555
22.1104
25.2781
27.8501
33.6668
13.35
38.9412
31.3481
28.5691
18.9492
36.397
23.3328
40.3633
42.1451
6.49481
20.8274
18.3804
37.8568
18.5576
39.5403
31.0815
30.764
17.3274
31.6184
25.0907
21.7816
18.8187
29.3847
19.527
24.7972
22.886
23.6388
37.1505
29.4677
21.0804
1.33441
30.3372
17.181
23.1171
26.4637
33.3181
30.2176
44.4391
6.77204
21.0399
17.8711
9.02778
26.0025
20.5178
20.8561
37.4356
25.2781
25.6171
24.9716
37.4007
20.8274
26.6334
13.5401
27.6533
27.3111
9.22306
15.6757
32.5133
28.9835
12.699
17.7401
15.4111
19.0879
26.7268
49.6863
26.2491
33.3181
29.8289
21.3345
27.4441
15.0422
29.7994
19.1562
25.3751
21.2989
5.04125
24.4965
29.5326
34.4536
18.0484
20.1617
21.5843
38.803
20.7056
18.8507
20.2773
18.7321
32.9585
30.1208
31.0206
15.306
4.68457
15.7144
7.9017
7.75677
24.0372
29.4349
35.1848
34.0178
29.9917
39.6986
14.7767
12.1266
32.0618
16.0615
15.1492
32.3674
42.5514
12.6123
40.7029
17.6272
32.597
14.3711
16.3633
25.5968
21.0399
25.5917
30.2907
27.1169
18.7313
37.1816
30.3914
33.4051
11.7109
36.6797
41.7805
13.4465
26.4637
31.7186
4.86803
16.8401
25.1833
28.2874
5.50821
22.8754
42.5597
12.1642
37.1188
31.3255
12.1697
26.1172
37.0957
18.9004
37.7231
47.4162
23.0306
19.5324
25.9796
16.9371
14.0879
46.8873
17.4931
33.0216
13.1545
20.4305
12.3953
16.7197
41.4221
12.9158
30.3206
25.8701
18.1855
40.4098
12.0481
16.3633
16.3323
28.4707
39.353
28.9979
32.5181
30.8348
17.8711
22.2753
11.6432
43.2555
28.7309
36.4485
32.6622
25.2436
30.9
18.6806
5.32959
7.70846
36.6455
24.0372
32.2165
13.0508
25.0392
39.7757
10.517
31.3105
26.3556
34.0575
25.1865
30.525
29.9945
15.8036
49.3642
13.0385
33.8192
31.1297
15.4188
10.8538
28.9835
25.7238
35.3752
15.8391
20.3167
9.14167
28.8676
41.5013
25.8692
31.011
20.3944
34.3823
26.1102
33.4401
27.1412
25.5111
35.3012
39.0601
25.1269
28.4145
49.3033
18.8789
24.7327
7.04386
4.53847
33.3698
31.1792
27.3111
39.6789
4.24692
38.0061
19.3121
30.8925
21.6426
31.1382
44.8192
35.1057
22.633
17.5719
5.24209
32.4283
15.6269
30.1499
25.4033
40.2108
12.6038
15.4471
24.2567
21.8275
25.0762
41.5298
9.32596
32.208
16.384
25.5613
22.9428
20.5118
6.26839
16.3323
25.2633
44.2562
49.449
7.87267
11.7703
22.0535
16.1922
48.515
12.7421
23.4387
33.4478
36.677
9.93769
35.0287
25.6893
31.9782
27.7338
30.0081
6.88492
31.243
19.8293
30.6107
26.6011
22.6578
24.5265
22.278
11.029
31.3033
22.2845
15.7705
6.7405
43.4651
13.4465
23.1447
20.8735
37.1729
16.2591
21.5207
20.8561
5.91084
20.8462
12.7421
39.393
12.4742
15.2419
18.5828
32.271
40.667
34.4865
24.7656
25.0762
35.1057
23.4577
30.6348
37.4619
23.9486
24.6825
34.9405
4.01377
18.0154
31.611
26.6813
19.384
15.2012
15.3981
33.3964
31.1253
20.9256
26.6011
32.7634
13.5352
36.3014
27.5624
36.4847
25.9339
39.8318
48.7722
28.318
5.59145
23.1053
29.6451
38.3802
19.6783
13.6664
33.9318
26.1463
21.9417
38.537
30.7575
41.7583
24.0216
7.25266
20.9291
1.33441
29.6738
35.5419
30.7994
25.089
35.6649
23.8943
17.6952
5.07152
30.8031
25.8045
9.13471
3.82633
26.8187
23.314
32.8745
34.2697
36.6455
18.8648
29.5653
30.0143
24.7225
29.8973
27.8099
24.1791
30.8893
36.4847
8.84876
13.9077
35.9484
31.412
13.1294
30.863
23.5814
26.2649
19.2617
21.7889
28.2923
29.9515
24.2553
12.9784
35.7919
32.913
24.6144
26.6716
49.5625
10.3135
24.4367
14.5191
13.2936
44.259
13.8533
25.4947
29.6978
29.2081
22.6578
26.9205
15.0422
19.384
44.0168
36.2859
17.802
32.6569
39.4721
31.3033
27.0097
13.3899
33.7995
37.2742
12.1642
33.9637
27.0725
31.1297
14.8856
29.6014
18.5829
19.5946
28.1165
24.248
28.4099
16.9237
21.7832
8.49384
27.4441
23.4651
19.1227
26.4913
43.1272
45.51
32.9861
17.4693
19.3761
39.1241
31.414
44.0929
19.6318
7.00933
30.9765
27.1072
27.1169
24.2374
16.9092
7.65224
22.5847
38.3463
21.5207
12.2605
22.4257
22.4055
21.5757
32.5841
40.0542
27.3586
29.3563
17.0806
29.4251
33.5224
40.8516
28.756
26.0162
30.7575
27.8327
30.6854
32.2039
10.7829
25.9339
12.1876
25.5871
15.6271
12.0365
38.2278
16.3735
27.7728
11.405
19.1586
9.32596
14.7953
12.699
13.7566
17.0784
23.2249
21.5964
31.7301
3.96009
18.3646
22.4855
31.1959
18.0097
45.7308
23.6103
3.87562
15.0261
26.3
29.7246
42.6201
27.343
39.9646
44.2793
6.30321
43.0248
28.93
27.4172
24.7327
39.6966
38.9023
37.1083
43.2612
23.0882
37.6949
21.62
11.999
39.0502
42.8071
24.4983
36.6027
12.0171
25.1833
19.4136
20.4788
13.1008
24.6144
37.7546
31.4733
38.9036
31.0446
30.334
31.1382
16.7927
5.83261
20.0435
8.86701
8.57155
32.9126
32.6612
6.02106
26.3486
30.0059
19.1586
43.9121
31.3608
19.7652
20.5118
32.2466
9.3786
32.8343
24.9155
25.273
35.5915
36.64
7.89866
4.84229
30.8029
36.4182
22.65
9.99643
21.5843
28.4103
26.2901
24.8321
26.5301
29.6338
27.225
29.2976
21.7889
26.252
35.579
14.0879
23.347
18.9258
19.4136
28.3209
7.05647
29.4511
36.0771
25.8959
41.4965
7.58684
20.6393
21.5815
13.8498
25.4531
48.4134
28.6129
11.8986
24.0954
41.1529
20.3377
24.5812
30.0135
30.6107
42.0798
29.9243
18.9765
26.6334
23.8542
19.7981
8.57022
26.4641
23.4577
20.5558
25.1848
24.7457
34.9893
46.634
31.9198
31.5835
6.03879
27.4487
6.7405
20.5494
7.65889
31.1959
26.9309
5.7874
31.611
39.4724
27.2109
33.1283
27.9496
34.6074
38.5797
5.44562
19.6159
14.0352
21.3274
32.935
36.9132
18.8187
7.61519
30.4915
22.7549
13.4534
27.0254
18.3804
43.5079
32.0325
43.015
29.2283
27.2233
39.0502
31.911
33.7497
3.97712
16.3716
44.5909
21.1158
31.0815
32.5841
35.7109
29.1923
36.1497
42.4611
33.8061
27.245
25.6921
28.7797
13.5451
17.3455
26.5714
25.3108
36.4986
30.6999
10.7405
40.1537
13.8918
29.1923
24.3479
13.3899
28.3712
39.8184
18.0902
29.8477
39.5057
12.394
30.732
34.058
8.15625
16.2219
29.4349
14.8168
19.0962
36.0991
23.9141
33.8061
6.77204
28.499
41.5839
22.5948
18.6348
13.6841
16.4002
38.9262
18.9093
32.2466
34.3925
4.44787
23.3136
17.3652
24.3479
28.4099
15.5487
12.6155
44.5044
8.628
32.7167
11.9936
25.0628
16.9361
39.6815
31.873
15.0875
30.0905
4.86763
14.6074
13.2341
16.384
46.7921
36.7914
45.5524
4.05284
26.4913
15.6269
33.3393
41.1946
24.4942
29.8799
29.118
22.2845
22.7029
18.5444
7.93862
13.5115
27.6375
5.0164
40.1282
42.4761
33.6739
17.2291
41.7084
13.5975
32.0313
35.3089
31.0335
17.1356
35.087
27.5617
32.4209
9.92335
46.0768
28.6008
48.0941
37.9099
28.358
24.5317
22.886
38.363
19.6773
24.735
7.70846
30.1751
31.4845
19.717
22.3082
30.1971
5.392
21.3345
28.5617
8.95207
13.29
39.0548
40.2811
21.5519
30.2102
22.0931
38.9218
17.4693
36.3503
16.1988
31.1792
12.9784
22.2861
10.5061
31.1105
9.28892
11.7886
32.2651
8.95207
41.1553
16.091
37.2068
18.5603
28.5877
34.0575
31.3007
30.512
21.8249
40.2224
17.3455
19.7706
24.7403
17.7694
29.4629
15.3981
43.6077
28.5713
37.7734
23.633
32.4855
48.3678
14.0383
34.678
20.9046
12.3953
36.7671
29.4939
17.2794
8.14146
25.5613
33.737
35.6947
6.66712
32.4005
9.99843
9.23695
17.5703
4.25139
19.6812
8.57022
14.8279
36.8634
18.3646
24.0102
38.1872
19.6773
5.07152
33.4464
22.4727
9.08547
24.1791
41.5103
17.1665
35.8385
28.93
22.753
5.9037
23.0414
9.13471
46.7921
42.3595
24.6925
30.2013
27.4654
31.6832
26.8712
22.9978
22.1179
16.9602
30.8802
30.8925
30.9835
32.2064
32.6086
23.0423
32.2357
12.9175
34.3818
18.4787
24.6197
3.40875
39.0668
38.0729
24.7457
25.8491
6.32933
19.7501
14.6501
30.8405
40.2809
9.93769
43.8498
8.49384
24.8936
30.3181
7.75677
11.7886
38.5634
22.2847
22.8599
48.5177
34.4757
39.958
14.7451
10.8479
13.2277
39.9168
19.8159
10.4561
31.3755
28.5871
36.515
24.3272
42.1322
20.4765
38.7177
19.1253
41.0634
32.4005
9.23695
34.2491
28.3836
21.6603
27.3895
5.69484
19.8408
43.5501
42.6069
36.9938
26.2431
8.628
14.4409
28.6136
39.3345
22.1731
23.515
36.4986
12.0481
21.1563
14.4021
37.2094
29.2525
24.3166
39.0103
42.9303
32.6059
37.2623
29.0255
36.1834
29.0605
32.5106
18.7321
17.417
29.9515
29.5855
28.7599
28.5565
28.0376
30.1659
31.9288
14.6074
15.0488
28.7775
33.7718
26.5056
15.8464
8.12182
17.63
21.2582
26.1924
40.1634
30.6974
27.4923
27.1549
43.3466
27.8942
14.6939
20.5923
48.6544
12.6599
33.0094
13.8498
22.131
30.6277
32.184
26.2222
11.999
25.9602
16.091
31.1798
37.5751
27.9105
34.8193
12.7455
44.1847
17.7694
24.9241
35.8078
18.7313
25.0583
24.8936
21.8422
36.9988
4.74007
20.2269
18.6506
21.9707
43.765
33.8074
33.2992
16.1554
36.0425
34.3098
26.4678
39.2067
16.4719
9.92335
29.3366
3.55674
15.4471
33.6577
13.7857
20.748
42.0578
8.14146
25.9122
24.9716
26.8171
45.791
27.3155
26.5581
13.352
35.6124
22.0958
6.31241
29.1896
13.4534
36.692
13.9134
21.4159
17.9909
43.3352
22.167
34.4605
26.1448
8.15625
12.394
9.99643
16.6984
28.499
25.3751
35.8942
5.50323
15.691
35.8687
15.2335
33.6739
13.9697
36.8634
28.7797
16.2868
47.264
13.7717
7.87267
6.12682
25.713
11.2875
30.1971
27.2294
49.8747
15.8391
47.3369
24.4596
37.6522
21.116
33.1863
16.9221
31.6061
37.2279
21.9977
42.807
22.9833
25.3708
36.8936
33.7419
39.7526
26.8321
36.6241
37.3245
6.43574
34.9868
28.5658
8.13235
6.88492
35.2136
10.8479
16.9026
38.3802
10.3288
32.0564
38.3242
20.7407
38.8178
25.9796
14.933
6.01885
17.0424
18.1884
22.984
7.9177
37.9296
21.5456
10.2424
22.7455
22.3082
22.2847
35.3012
31.5427
9.38852
35.0283
24.0527
11.8545
28.3015
43.0148
33.8029
18.099
13.9077
23.5814
32.9812
34.0178
33.9206
20.3944
6.49481
24.6416
17.417
38.9572
16.321
34.2209
30.4147
34.771
25.2436
37.5689
28.883
18.6806
35.0287
7.04386
15.795
36.4751
10.5635
32.0637
24.9632
12.014
7.17596
23.251
10.3135
15.2335
28.7309
36.0015
36.4485
7.47414
21.5571
34.9068
18.4949
30.4338
19.2617
16.5419
18.0154
12.8509
21.7446
16.1988
36.5135
30.8686
31.2534
10.9056
5.7874
26.9583
15.7444
26.4678
26.3741
34.0118
28.2978
28.6435
29.7055
24.2567
12.0964
39.9074
35.6246
10.3288
4.29249
30.3195
41.0157
13.836
17.3745
8.64183
42.9323
46.3234
35.4319
36.7787
45.3885
12.6123
25.4754
9.3786
21.2566
35.3373
9.15429
5.55546
16.2551
11.9458
49.8626
15.6271
26.2242
19.305
7.9177
37.6949
10.8384
19.3121
18.8531
27.2811
25.6525
39.2325
10.8139
33.3875
36.7671
7.99169
25.9999
30.6999
35.5403
20.3703
16.4023
44.5333
15.2149
23.5565
20.6976
24.2458
38.4486
14.1372
23.3328
18.4787
20.748
21.9417
38.1701
25.3417
31.5835
42.1322
25.8686
35.6413
24.4481
6.23975
3.00813
35.3322
30.1157
25.0583
13.5352
10.5061
37.2314
20.3133
28.318
26.0551
21.5757
24.6825
16.5419
16.1645
39.4842
37.2941
36.0458
47.8637
20.6153
21.3048
39.0668
24.4596
7.56163
36.407
31.6552
38.6194
19.7706
15.4188
20.5129
30.2013
26.9163
20.2668
35.9036
20.7056
28.188
23.8905
5.44562
38.8702
20.5129
8.41599
20.3133
31.3013
11.7578
4.62657
21.0867
25.9999
26.9636
19.9201
24.9915
35.8942
21.0804
44.6832
42.945
31.011
43.8221
33.8925
7.25266
21.8375
42.3736
15.9679
11.9458
4.84229
37.7871
3.40875
27.3339
28.6304
18.8403
25.5507
18.2586
18.9004
15.691
28.5555
40.7029
29.347
35.0934
22.7029
31.4214
13.067
45.5709
21.5745
33.8781
17.2291
37.4762
23.515
9.14167
20.5923
19.015
13.9122
23.3199
30.2363
12.6552
21.0932
16.3034
15.4827
6.28363
15.9679
31.5977
28.9894
29.8839
6.31241
14.1372
7.00933
25.0768
39.1981
23.6086
25.1848
19.823
25.0857
26.8171
19.2906
13.5674
19.9572
17.5788
21.8514
29.2151
24.4092
4.25139
22.4251
18.5444
30.863
29.5808
18.9765
16.3724
8.84957
16.0615
36.8487
32.1856
6.43574
20.5494
5.04125
24.9632
31.412
16.9026
30.1106
23.1053
5.66978
20.574
31.8628
7.9017
34.5395
15.0232
20.8446
11.8986
15.6757
33.8164
29.4632
38.7898
34.1919
10.0832
2.42172
32.2152
20.6249
44.2793
32.2357
23.8943
16.681
21.1582
27.159
27.9496
14.933
37.2941
25.5507
18.4242
3.76577
3.87562
27.0347
29.4939
25.8028
26.7925
41.7155
35.9036
32.1934
16.9694
31.2654
33.6581
42.5117
34.5454
15.0232
46.6889
23.4698
3.6291
37.6038
42.6228
29.7055
31.1128
36.0982
24.557
23.2365
22.6553
8.97188
27.3155
23.0703
23.2365
33.5224
44.3048
32.2152
45.442
30.3717
13.2936
25.7107
11.0499
30.3371
20.6153
5.91084
14.8856
32.2165
14.6967
14.3711
26.3
4.59121
22.288
26.1448
25.1688
31.9082
44.2059
16.9371
33.1392
26.3465
18.3247
37.9099
28.6284
32.1922
14.4021
34.2697
16.0892
15.2419
31.9621
36.4751
43.0907
23.8905
21.5124
20.2269
25.0768
27.0347
11.0663
34.087
40.8026
39.2357
16.3724
30.7257
26.169
21.5745
23.1849
4.86763
25.5968
15.5574
37.3838
43.0148
22.9833
22.753
34.8095
30.3092
39.455
26.0216
29.0055
28.6435
13.8533
22.8191
26.1463
38.402
10.11
35.1442
36.5423
10.2424
22.3978
25.1496
42.3206
21.9707
32.1529
33.2788
20.1595
22.8877
40.45
3.16537
29.5201
33.8543
12.014
12.6789
32.6559
23.9141
27.1857
49.3642
39.9692
33.5019
13.352
37.6596
14.9697
5.66978
10.8384
17.3652
19.8651
23.0703
9.99517
26.2242
34.1724
25.4779
22.173
33.7389
21.6735
30.4147
19.527
6.36019
24.3921
22.0535
18.2197
8.67452
13.7039
34.7305
45.9601
41.1335
27.8327
20.9256
37.9555
27.6789
28.799
7.43677
31.6188
42.5514
35.1473
18.6506
36.8119
4.29643
21.4268
18.9258
14.037
31.5622
25.273
26.3645
32.1766
26.9065
34.9108
21.3048
32.3577
16.2868
34.5857
31.8628
11.5614
21.5506
15.9391
35.7864
22.6076
38.1168
6.31633
23.8773
18.9794
33.1954
16.9092
47.7092
22.2154
8.97188
24.2998
19.8159
30.9
23.2101
19.9062
36.7309
29.0133
11.0404
25.2456
19.1562
31.3105
21.0386
19.7917
31.7346
25.0628
7.56163
10.8002
25.713
36.2195
8.12182
35.0876
19.0878
19.107
20.574
9.99517
11.1414
28.4424
34.6034
3.67595
31.3007
44.7963
18.8628
34.8781
18.5241
33.4224
17.6284
22.1179
27.3373
42.9365
47.7869
35.997
37.6262
21.5124
35.5555
44.7756
27.7273
27.0097
7.93862
46.5247
11.1055
13.5451
19.6074
30.8905
45.5152
28.1273
12.1876
19.1253
13.5276
19.7501
13.5401
31.9928
31.6752
16.9221
33.4446
24.586
29.3366
33.2608
26.0162
31.6757
34.1636
23.0306
30.8018
15.1492
21.9242
7.47414
43.3516
6.70554
9.15429
46.0222
23.0414
43.6066
20.2084
32.9812
31.3608
3.76577
36.7914
7.10369
7.61519
33.1134
19.7652
38.8294
17.7198
31.4214
23.9283
23.866
20.6893
22.5847
38.3242
9.35421
20.5178
32.7805
4.55539
33.3297
41.7655
36.0489
27.8099
18.0484
38.1897
19.9572
36.7376
29.4568
15.4827
24.1484
18.6546
36.2636
23.0452
26.8187
14.7475
31.4841
9.3613
5.0164
25.4901
22.7455
6.31633
33.4409
4.35816
39.3749
4.53847
4.01377
16.7986
3.67595
13.2968
16.681
15.1227
25.9122
25.7238
27.4172
19.0878
37.8165
34.0762
31.6832
13.9134
10.8002
37.2742
16.826
44.6088
48.4722
37.9986
4.27625
18.1394
45.6299
36.6403
21.1158
18.5576
40.8043
24.0216
21.5506
35.8676
34.3873
26.0933
22.6065
28.5893
30.8348
20.146
34.0678
29.5893
10.9056
28.7718
35.1019
28.5871
30.7279
25.4754
35.2124
26.918
26.9998
29.7321
32.4501
27.0148
6.70554
39.353
44.642
33.8349
18.4003
41.5816
22.4055
29.6968
23.4446
41.5103
19.015
18.8311
18.3018
7.67255
13.9122
24.6197
29.1128
27.1257
7.10369
49.2264
18.5828
35.8601
14.7953
9.12253
30.607
23.1227
13.7063
6.12682
10.7555
40.5378
45.2857
41.9434
13.8903
25.2785
26.983
22.9555
19.6783
35.232
32.113
30.6386
9.01301
23.2195
19.4333
29.9242
27.2233
17.6284
38.7177
29.8839
27.1072
26.2222
17.4931
4.3782
19.305
33.4464
42.4908
31.1985
11.6432
15.2149
40.8946
32.0849
27.051
9.32272
25.4991
29.7994
13.7063
14.9091
21.7832
26.136
3.96362
30.3695
23.7909
32.7805
30.7361
24.7972
29.624
22.3088
8.84876
21.5519
26.5033
35.5285
42.3711
41.1766
11.4796
11.6824
19.7446
20.0718
44.6232
35.0283
20.4872
32.759
28.7315
30.2943
8.57155
37.3017
25.9138
9.12253
40.4373
22.7964
14.8168
43.3639
25.0829
24.1034
4.29643
31.0991
11.7439
35.598
30.9736
29.4632
41.7583
22.3797
14.7451
25.6525
7.87173
24.2553
24.2998
38.8389
23.0741
37.3308
13.1765
18.8531
15.8888
21.8776
24.1484
3.6291
13.7717
41.7731
24.916
42.4574
18.4003
17.4997
32.6569
4.68457
21.2582
15.795
43.9589
38.8016
34.1321
22.9978
13.2341
33.4213
23.6086
3.00813
11.6824
5.91533
[truncated: 930 more rows]

## Sheet: Figure 3g
celltype	nearest neighbor distance (um)	group
I13	15.6592	self
I13	10.5658	self
I13	20.6068	other
I14	7.47022	self
I14	15.977	self
I14	9.54241	self
I13	15.7438	other
I13	10.7167	self
I13	18.225	other
I13	17.0014	self
I13	15.904	other
I14	10.7858	self
I14	12.3273	self
I13	16.9658	other
I13	16.3519	self
I14	17.6948	self
I14	9.55546	self
I14	10.0394	self
I14	11.6998	self
I13	12.3746	other
I14	6.07558	self
I14	7.72602	self
I14	11.732	self
I14	9.9649	self
I13	18.8292	self
I14	14.7614	self
I13	21.0559	other
I14	10.3388	self
I14	14.3019	self
I14	10.1155	self
I14	14.2668	self
I14	11.7754	self
I13	14.3767	self
I14	13.555	other
I14	9.81625	self
I13	17.2364	self
I14	7.22237	self
I14	7.96122	self
I14	10.2546	self
I13	12.0935	self
I13	8.78954	self
I13	17.9951	self
I14	8.12768	self
I13	12.7417	other
I13	16.1301	other
I14	16.81	self
I14	13.7703	self
I13	18.7519	self
I13	10.0448	self
I14	13.3319	self
I13	15.6285	self
I14	15.0357	other
I13	15.9029	self
I13	22.0282	self
I13	10.6736	self
I13	9.58071	self
I14	11.7065	self
I14	13.7201	self
I13	10.1849	other
I13	18.4431	other
I13	9.08063	self
I14	7.86839	self
I14	15.7089	self
I14	13.9782	self
I13	13.8683	self
I14	15.5433	self
I14	10.6149	self
I13	13.5676	other
I14	12.1968	self
I13	16.6528	self
I13	9.92057	self
I13	12.9113	self
I13	11.1309	self
I13	15.1666	self
I14	14.4685	self
I14	12.1965	self
I14	12.914	self
I13	17.2101	self
I13	14.5431	self
I14	13.8374	self
I13	12.6073	self
I14	14.6021	self
I13	11.9103	self
I13	9.90124	other
I14	14.5342	self
I13	16.0082	self
I14	15.6215	self
I13	14.048	self
I14	8.98453	self
I14	18.4825	self
I14	9.56122	self
I13	14.9984	self
I14	11.8574	self
I13	19.2879	other
I13	19.4363	self
I14	12.6251	self
I13	12.5477	self
I13	17.2315	self
I14	14.3572	self
I13	11.9577	other
I13	10.0045	self
I9	28.2203	other
I14	8.88277	self
I14	17.0452	self
I14	12.6895	self
I14	15.5665	self
I14	14.882	self
I14	13.9091	other
I14	8.99048	self
I14	9.02642	self
I13	12.8443	self
I14	12.7275	self
I13	21.8992	self
I14	12.3644	self
I13	16.2212	self
I13	16.9499	self
I13	14.3814	other
I13	12.4005	self
I14	6.07558	self
I14	9.56585	self
I14	12.5796	self
I19	26.2692	other
I14	8.56424	self
I14	13.1664	self
I13	26.6127	self
I14	9.99054	self
I14	9.9649	self
I14	11.0769	self
I14	12.967	other
I14	12.087	self
I14	13.4403	self
I14	15.8203	self
I9	9.91158	other
I14	13.3049	self
I13	9.64837	other
I14	7.01292	self
I14	11.5621	other
I14	10.1484	self
I13	14.2194	other
I13	17.9513	self
I14	11.3907	self
I14	11.4562	other
I13	15.6442	self
I14	14.5997	self
I14	12.4457	other
I13	6.37153	other
I14	10.0831	self
I14	9.91045	self
I13	14.1722	self
I14	11.6929	self
I14	15.1183	self
I14	11.7577	self
I14	8.5547	self
I14	15.6433	other
I14	11.9001	self
I14	6.86047	self
I14	14.8116	self
I6	33.2397	other
I14	13.8608	self
I13	10.0968	self
I13	14.7424	self
I13	16.4794	self
I13	19.9887	self
I13	15.44	self
I14	15.6104	self
I14	12.1892	self
I13	17.4402	other
I14	13.2046	self
I14	11.4042	other
I14	10.8473	self
I13	13.8877	self
I14	16.5295	other
I13	14.0865	other
I14	11.8012	self
I13	9.43204	other
I13	16.8899	self
I14	11.8499	self
I13	28.8837	self
I13	15.4904	self
I14	15.9084	self
I13	13.4639	other
I14	9.3121	self
I13	6.38837	other
I14	17.8028	other
I14	15.3107	other
I13	16.5526	self
I14	13.8515	other
I13	10.1885	self
I13	16.0846	self
I13	18.4106	other
I14	9.08194	other
I14	13.0029	self
I14	13.4078	self
I14	14.7636	self
I13	21.3627	self
I14	20.8905	self
I14	18.5284	self
I14	17.6202	other
I13	16.175	self
I13	10.0968	self
I13	12.9456	self
I14	12.2444	self
I14	11.3907	self
I13	12.4084	self
I14	16.583	other
I13	10.2899	other
I3	14.4139	other
I13	9.15906	other
I13	9.78684	self
I14	9.76713	self
I13	13.5002	self
I13	14.3653	self
I14	16.2059	self
I13	9.67981	self
I14	11.5502	self
I14	14.9978	other
I13	9.34612	self
I14	12.8737	self
I13	14.9656	self
I13	15.0745	self
I14	9.72391	self
I13	19.6252	other
I13	13.0579	self
I14	15.8943	other
I14	16.5547	other
I13	17.2101	self
I14	13.3169	other
I14	9.66716	self
I13	16.7622	self
I14	13.4092	self
I13	14.7237	self
I14	18.8244	self
I14	10.1849	other
I14	13.0376	self
I13	17.7072	self
I14	8.79757	self
I13	9.19988	other
I14	11.2167	self
I13	22.3108	self
I13	24.4824	other
I13	12.7355	self
I14	17.1232	other
I14	8.96642	self
I14	16.7013	self
I14	13.5668	self
I13	12.3694	self
I6	27.2622	other
I14	11.5492	self
I14	9.10298	self
I14	12.3812	self
I14	11.3126	other
I13	12.9917	self
I14	12.8209	self
I14	9.53786	self
I14	12.5947	self
I14	11.4782	self
I14	15.8372	other
I13	16.5909	self
I14	14.5684	self
I14	7.52755	self
I13	14.6136	other
I13	11.9988	self
I14	11.2667	other
I14	14.1389	self
I13	18.8379	self
I13	12.967	other
I14	14.5137	self
I13	11.9988	self
I14	12.9239	self
I14	7.52065	self
I13	10.0045	self
I13	15.0297	self
I14	12.0204	self
I13	21.0155	self
I13	18.2454	other
I14	10.9863	other
I14	7.92018	self
I14	8.4086	self
I14	10.6149	self
I14	13.5504	self
I14	12.7275	self
I13	16.7973	self
I13	14.1917	self
I14	10.8768	self
I13	11.1022	self
I14	13.1621	self
I13	21.0312	self
I14	10.7858	self
I13	9.73029	self
I14	10.2546	self
I14	13.2263	self
I13	8.29513	self
I14	16.5778	other
I14	12.4686	other
I14	13.6109	other
I13	18.9147	self
I13	12.6073	self
I14	13.3247	other
I14	10.9846	self
I14	11.6929	self
I13	10.1522	self
I14	12.8413	other
I3	10.6378	other
I6	20.895	other
I14	6.37153	other
I13	13.3169	other
I14	8.12768	self
I14	12.8683	other
I14	15.9192	other
I14	14.3194	self
I13	13.8593	self
I14	11.0113	self
I14	10.2899	other
I14	13.1508	self
I14	15.3296	other
I14	12.6902	self
I14	10.5252	other
I14	16.0157	other
I14	10.5761	self
I13	11.7803	self
I13	17.5452	self
I14	8.63379	self
I6	23.123	other
I13	23.5181	other
I14	15.219	self
I14	8.34111	self
I12	12.7708	other
I14	17.1538	self
I13	14.3428	self
I13	13.6109	other
I14	11.7293	self
I14	10.1444	self
I13	11.603	self
I14	12.2	self
I14	9.19988	other
I13	13.6701	self
I14	7.52755	self
I14	10.8548	self
I14	15.2797	self
I13	15.1672	self
I14	9.07693	self
I13	13.0418	self
I13	14.9656	self
I14	7.79802	self
I14	13.2639	other
I14	8.75312	self
I13	9.32606	self
I11	16.5353	other
I14	15.3327	self
I13	13.201	self
I13	12.9148	self
I13	13.0381	self
I13	9.88865	self
I14	15.4475	self
I13	10.5794	other
I5	12.7928	other
I14	17.7376	self
I14	6.55347	self
I14	13.4219	self
I14	8.90625	self
I13	16.289	self
I14	14.3194	self
I14	10.8721	self
I14	11.2589	self
I13	9.78684	self
I14	9.7174	self
I14	13.6766	self
I13	15.6384	self
I14	10.1424	self
I14	13.8374	self
I13	44.5498	self
I14	13.6604	self
I13	13.1015	self
I13	12.8683	other
I14	15.977	self
I14	10.3013	self
I14	11.6621	self
I13	14.3428	self
I14	13.5564	self
I13	17.8207	self
I14	13.4098	self
I13	14.9313	self
I14	15.72	other
I14	13.1225	self
I13	19.1602	other
I14	14.4685	self
I14	14.2586	self
I13	16.1432	self
I13	8.00033	other
I14	16.4849	self
I14	9.54241	self
I14	10.4175	self
I14	11.8727	other
I13	23.4613	self
I13	10.9585	self
I13	9.83396	self
I14	9.96094	self
I13	13.8415	self
I13	13.1015	self
I14	8.56271	other
I13	10.9175	self
I14	14.7212	self
I13	10.3007	self
I14	13.4351	self
I14	9.43204	other
I14	15.1951	other
I14	17.0342	self
I14	11.6621	self
I14	12.1978	self
I13	16.4319	other
I14	14.0524	other
I14	13.1516	self
I14	7.55604	self
I14	12.4787	other
I14	7.55604	self
I14	11.5019	self
I14	8.96642	self
I14	10.5475	self
I14	15.458	self
I14	14.613	self
I14	11.0974	self
I14	7.86839	self
I13	12.045	self
I13	11.197	self
I13	12.4155	self
I14	21.7776	self
I13	12.7039	self
I14	9.53099	self
I14	9.87087	self
I14	11.675	self
I14	10.9219	self
I13	13.4453	other
I14	14.0053	self
I13	12.6836	self
I14	8.83539	other
I13	11.7668	self
I14	15.6254	self
I14	10.3536	self
I14	10.2308	other
I14	16.236	other
I1	8.00033	other
I13	14.6371	other
I9	14.8916	other
I14	10.662	other
I14	14.9501	self
I11	24.4013	other
I14	12.1818	other
I13	9.08194	other
I13	17.2768	self
I13	20.1878	other
I14	14.1019	self
I14	6.86047	self
I14	12.1647	self
I13	12.5407	self
I13	13.9078	self
I14	11.3193	other
I14	13.3478	other
I14	14.0063	self
I14	11.4926	self
I14	13.3103	self
I13	16.939	other
I21	18.5836	other
I13	12.1642	other
I13	15.3969	self
I14	10.5278	self
I14	12.6251	self
I13	29.0564	self
I14	14.915	self
I13	23.7125	other
I13	12.3406	self
I14	13.6604	self
I13	12.0106	other
I13	9.6186	self
I14	10.1338	other
I14	9.9852	self
I13	14.7022	self
I14	13.5027	self
I14	12.4448	self
I13	12.9113	self
I13	17.5	other
I13	17.4943	self
I14	6.38837	other
I13	16.4787	self
I13	9.21839	other
I14	11.7423	self
I14	9.61006	self
I14	5.42512	self
I14	11.4782	self
I14	9.7523	self
I13	17.6202	other
I13	8.37247	self
I14	15.493	self
I13	10.3278	self
I14	12.4296	self
I13	7.46893	other
I13	14.18	self
I13	12.8361	self
I14	12.5562	self
I13	14.4627	other
I13	15.839	self
I14	16.0533	self
I14	13.0029	self
I13	9.08063	self
I11	12.1874	other
I13	9.89777	other
I13	11.796	self
I14	8.76422	self
I14	15.3976	self
I14	11.8525	self
I14	14.6735	self
I14	11.7691	self
I14	9.71094	self
I14	11.0989	self
I14	16.0713	self
I14	13.2263	self
I14	9.89777	other
I13	12.517	other
I13	10.6456	other
I14	12.3111	self
I14	8.79757	self
I13	17.2745	other
I14	19.2443	other
I13	12.3139	other
I13	17.0663	other
I14	16.0087	other
I13	10.5658	self
I14	18.6111	other
I14	8.4086	self
I14	10.1578	self
I14	10.7738	self
I13	11.8276	self
I14	10.6395	self
I13	12.5897	other
I14	17.7919	other
I14	16.0812	other
I14	11.101	self
I14	12.8754	self
I14	10.3146	self
I14	11.5209	self
I14	9.13765	self
I13	16.1229	self
I13	12.4457	other
I13	13.6062	other
I14	9.7174	self
I14	14.3147	self
I14	12.8055	other
I14	16.4849	self
I13	14.3653	self
I14	14.2668	self
I13	11.4562	other
I14	14.1546	self
I10	18.2508	other
I13	13.3247	other
I14	14.9846	self
I14	12.0993	self
I14	14.3325	self
I14	14.3122	self
I14	13.7742	self
I14	10.1444	self
I14	10.6725	other
I14	14.2586	self
I13	11.603	self
I14	10.5761	self
I13	10.1522	self
I13	13.8415	self
I13	11.1309	self
I14	14.5002	self
I14	11.1488	self
I13	18.8432	self
I14	9.66716	self
I13	13.0974	self
I1	13.809	self
I13	10.9175	self
I13	12.4686	other
I13	6.30523	self
I13	15.0959	self
I14	11.7423	self
I13	12.7039	self
I14	12.8575	self
I14	11.7577	self
I13	15.0959	self
I14	14.0428	self
I14	13.3306	self
I14	15.2909	self
I13	17.6975	self
I9	16.9552	other
I13	12.4155	self
I13	13.7875	self
I14	14.1389	self
I13	8.06037	self
I13	13.7575	self
I14	14.6735	self
I14	14.7386	self
I14	14.7945	self
I20	18.4586	other
I13	11.888	self
I13	12.8413	other
I14	14.1044	self
I14	10.1155	self
I13	14.5431	self
I14	9.73202	self
I14	9.10298	self
I13	12.5407	self
I14	10.1578	self
I14	14.4778	self
I14	15.6049	self
I13	18.542	self
I14	6.48013	self
I14	9.80064	self
I13	14.3767	self
I14	19.0807	self
I14	6.6277	self
I14	15.5394	self
I13	9.6186	self
I14	7.71564	self
I14	13.2168	self
I13	12.4005	self
I13	12.1895	self
I14	13.2988	self
I14	14.0302	other
I14	10.0099	self
I13	16.03	self
I14	10.8927	self
I13	12.7355	self
I14	14.7998	self
I14	17.1334	self
I13	13.4266	self
I14	15.126	self
I14	14.056	self
I14	12.6038	self
I14	11.0974	self
I13	13.9155	self
I14	8.41452	self
I13	8.10129	other
I14	9.55546	self
I13	19.4657	self
I13	16.4226	self
I13	11.8542	other
I14	13.3031	other
I13	16.5193	other
I14	8.99048	self
I13	13.7051	self
I10	15.7046	other
I14	15.458	self
I14	9.1718	self
I13	8.06037	self
I14	12.9395	self
I13	16.7145	self
I14	14.8553	self
I14	10.1484	self
I14	11.6572	self
I14	14.5997	self
I14	11.8574	self
I13	9.16421	self
I14	21.5602	other
I13	13.0753	self
I21	23.7667	other
I14	10.8506	other
I14	16.5817	self
I14	13.1516	self
I14	11.2167	self
I14	8.52525	self
I14	14.4909	self
I14	12.6708	other
I14	12.9719	self
I14	8.52525	self
I14	14.1309	self
I13	15.2746	self
I13	16.5318	other
I14	9.64837	other
I13	15.7116	other
I13	14.3322	other
I13	14.8789	other
I14	13.9191	other
I13	18.1845	self
I14	17.7437	self
I14	14.582	self
I13	15.44	self
I13	24.9457	self
I14	12.0106	other
I14	9.51808	other
I14	12.848	self
I13	18.6008	self
I14	10.9846	self
I14	6.88964	self
I13	12.1372	self
I14	17.5587	self
I14	12.9239	self
I14	12.343	self
I14	8.67872	self
I14	18.522	self
I13	9.2534	self
I13	23.123	other
I13	13.8515	other
I14	13.4291	other
I14	7.01292	self
I14	9.91045	self
I14	8.65158	self
I13	9.92057	self
I13	11.1085	other
I13	14.3895	other
I14	16.2059	self
I14	11.4524	self
I13	13.9078	self
I14	12.372	self
I14	12.5796	self
I14	13.8569	self
I14	7.80103	self
I14	7.92018	self
I13	11.3761	other
I14	14.5049	self
I14	11.2499	self
I13	13.6432	self
I14	9.98267	self
I13	13.8333	other
I13	16.3291	self
I14	10.8473	self
I13	20.8097	self
I14	12.872	self
I13	14.1404	other
I14	10.1825	self
I14	13.6423	self
I13	17.958	other
I14	13.3619	self
I13	17.7072	self
I14	10.6395	self
I13	17.3896	self
I14	8.30959	self
I13	16.0597	other
I13	9.57205	other
I14	16.1748	self
I13	16.2887	self
I13	16.1805	other
I13	13.7051	self
I14	11.732	self
I13	9.79104	self
I14	10.4175	self
I14	9.76518	self
I14	11.8562	self
I14	13.7305	self
I14	14.3572	self
I14	9.21839	other
I14	12.1781	self
I14	15.8365	self
I14	19.2243	self
I14	10.1649	self
I13	13.7316	other
I13	14.6996	self
I14	8.75312	self
I14	8.63379	self
I14	11.5151	self
I13	10.0448	self
I14	8.74412	self
I13	12.8984	other
I14	11.7225	self
I13	9.44744	self
I13	16.5295	other
I14	6.88964	self
I13	9.96811	self
I14	14.2369	self
I14	12.3644	self
I13	11.8176	self
I14	12.3619	self
I14	9.87087	self
I14	11.0113	self
I14	7.72602	self
I14	10.3183	self
I14	13.5423	self
I13	13.4295	self
I13	17.4323	other
I14	20.3717	self
I14	15.2814	self
I14	12.3345	self
I13	17.0015	self
I13	10.3278	self
I9	18.2346	self
I13	15.976	self
I14	9.1718	self
I14	13.0741	self
I14	11.9087	self
I13	16.7613	self
I14	12.596	self
I14	9.50205	self
I14	16.4049	other
I13	12.5761	other
I14	9.57205	other
I14	10.1825	self
I13	13.6736	self
I14	14.1427	other
I13	15.0297	self
I14	12.6968	self
I14	9.92778	self
I14	10.9973	self
I14	15.1684	self
I13	23.5167	self
I14	13.8333	other
I13	15.3642	other
I14	12.1535	self
I14	12.6895	self
I14	16.2299	other
I13	20.7211	self
I13	13.9083	self
I14	12.1968	self
I14	16.0364	self
I14	13.9477	self
I13	16.4049	other
I14	13.3952	self
I13	14.2073	self
I13	8.29513	self
I14	8.67872	self
I14	9.98267	self
I13	10.7664	self
I13	15.9813	self
I13	12.7856	other
I14	7.96122	self
I13	13.0974	self
I13	18.1855	self
I13	12.9289	self
I13	10.417	self
I14	9.80064	self
I13	13.4671	self
I14	13.1077	self
I14	10.2644	other
I14	14.0371	self
I13	11.5621	other
I14	16.1805	other
I14	10.8492	self
I13	17.8207	self
I13	9.83396	self
I13	14.0836	other
I14	11.2777	self
I13	14.7203	self
I13	9.70059	self
I13	12.2351	other
I14	7.82862	self
I14	15.1041	other
I13	14.048	self
I13	14.1427	other
I14	15.4339	other
I14	13.2388	self
I14	13.1943	self
I14	14.8116	self
I14	11.9087	self
I14	9.48033	self
I14	10.1735	self
I14	8.36597	self
I13	12.1818	other
I14	16.713	self
I14	14.8224	self
I14	9.48033	self
I13	16.9678	other
I14	11.7421	self
I13	18.1688	self
I14	13.8569	self
I13	15.1041	other
I13	14.447	self
I13	9.32606	self
I14	7.62462	other
I14	14.8956	self
I13	19.2806	self
I13	13.13	self
I14	12.7837	self
I13	14.1722	self
I13	15.7746	other
I14	19.2243	self
I13	15.5338	self
I14	15.1543	self
I14	13.3402	self
I14	9.15906	other
I13	13.5002	self
I13	23.0409	self
I14	19.6096	self
I13	13.3713	other
I13	12.6597	self
I13	11.8276	self
I13	14.6053	self
I13	6.90276	self
I14	12.2261	self
I14	13.0835	self
I14	8.88277	self
I14	11.1085	other
I13	9.51808	other
I13	12.2109	self
I14	12.5558	self
I14	11.2312	self
I14	15.7437	other
I14	8.23648	self
I14	15.2101	other
I14	13.1429	self
I13	13.0579	self
I13	14.4907	self
I13	15.2503	self
I14	13.1664	self
I13	12.7479	other
I14	10.9663	self
I13	16.9207	self
I14	7.38313	self
I13	9.73029	self
I13	15.9321	other
I14	6.48013	self
I14	7.1621	self
I14	8.64095	self
I13	14.5764	self
I13	21.7694	self
I14	11.7358	other
I14	13.198	other
I14	12.9076	self
I13	10.7167	self
I14	19.7406	self
I13	18.5196	self
I13	16.4895	other
I13	6.90276	self
I13	14.9074	self
I14	11.7305	self
I14	10.5278	self
I14	12.2261	self
I13	17.0132	self
I14	9.18349	self
I13	17.7568	self
I14	14.0488	self
I14	13.5668	self
I14	13.6204	self
I14	16.4324	self
I13	16.8899	self
I14	11.5151	self
I14	16.4565	self
I14	12.1647	self
I13	13.8877	self
I14	15.9529	self
I13	17.0014	self
I13	15.57	other
I14	13.2609	other
I14	13.4351	self
I13	8.0017	self
I14	11.5209	self
I13	17.9028	other
I13	8.06076	self
I14	12.2458	self
I14	15.3061	self
I14	13.8576	self
I14	14.3895	other
I13	10.0767	self
I14	12.5761	other
I14	13.4219	self
I14	7.98737	self
I13	11.8727	other
I14	13.9014	self
I14	13.2389	other
I14	11.2225	self
I13	17.2027	self
I13	8.06076	self
I13	14.3999	self
I13	15.976	self
I14	10.9973	self
I13	17.6868	self
I14	11.5433	self
I13	12.2109	self
I13	16.7892	other
I13	9.67981	self
I12	10.4987	other
I13	15.4484	self
I13	11.7668	self
I13	18.55	self
I14	14.061	self
I13	19.2874	self
I13	9.16421	self
I13	16.6825	self
I14	9.07693	self
I13	10.3007	self
I14	10.9219	self
I14	13.9014	self
I13	14.8663	self
I13	13.2609	other
I14	5.42512	self
I13	20.9036	self
I14	14.0263	other
I13	17.0132	self
I14	11.7305	self
I14	13.1621	self
I14	10.1735	self
I14	14.3043	self
I14	14.6394	self
I14	12.0119	self
I14	9.13765	self
I14	12.0882	self
I14	10.8926	self
I3	23.3142	other
I14	15.0554	self
I14	14.0053	self
I14	8.76422	self
I13	20.7249	self
I14	12.9296	self
I14	11.3778	self
I14	7.24897	self
I13	14.7424	self
I14	9.72391	self
I13	24.9691	self
I13	17.686	self
I14	18.1055	self
I13	10.1885	self
I13	21.377	self
I14	6.6277	self
I14	7.38313	self
I14	10.5838	self
I13	17.5482	other
I13	13.1239	other
I13	16.7613	self
I14	8.88157	self
I14	12.1697	self
I14	14.8789	other
I14	13.1577	self
I14	15.6775	self
I13	12.9135	self
I13	16.0762	other
I14	10.5794	other
I13	11.5186	other
I13	17.2943	self
I14	8.23648	self
I14	14.3094	self
I14	14.3325	self
I14	9.85263	self
I14	9.0848	self
I14	12.1535	self
I14	15.3327	self
I14	11.2225	self
I14	15.9321	other
I14	11.5502	self
I14	11.5186	other
I13	11.4042	other
I14	12.3365	self
I14	12.8337	self
I14	7.80103	self
I14	10.0112	self
I6	10.1125	other
I14	17.1853	self
I9	30.3643	other
I13	14.3999	self
I14	10.8321	self
I13	13.8236	self
I14	8.34111	self
I14	13.6234	other
I13	19.717	self
I13	14.3512	self
I13	14.237	other
I14	9.61006	self
I14	14.3087	self
I14	14.6338	self
I13	7.62462	other
I14	14.0743	other
I13	18.3766	self
I13	10.8506	other
I14	12.3365	self
I14	11.5002	self
I13	11.888	self
I14	13.0435	self
I14	9.73202	self
I13	12.9289	self
I14	11.5019	self
I13	12.8361	self
I14	14.026	self
I13	11.2134	self
I14	22.0229	other
I14	10.5847	self
I14	14.9191	self
I14	7.54492	self
I14	13.7316	other
I13	14.4581	self
I14	17.794	self
I14	12.2672	self
I13	14.447	self
I14	10.6547	self
I14	10.3036	self
I13	20.216	other
I13	14.1702	other
I13	9.44744	self
I13	17.2315	self
I14	7.24897	self
I14	17.7437	self
I14	9.53786	self
I14	10.8927	self
I14	9.56122	self
I14	7.71564	self
I14	14.8553	self
I19	21.3627	other
I14	11.7293	self
I14	15.8365	self
I14	11.8437	self
I14	12.517	other
I3	26.5398	other
I13	7.31726	self
I14	8.90625	self
I14	8.10129	other
I14	10.9313	self
I13	15.1596	other
I13	12.9429	self
I14	12.1116	self
I14	12.1471	self
I14	9.99054	self
I13	15.9179	self
I13	10.9863	other
I14	12.0958	self
I14	11.2289	self
I14	7.54492	self
I13	12.4084	self
I14	7.1621	self
I14	14.2729	self
I14	12.7225	self
I14	9.85263	self
I14	16.4895	other
I14	12.2399	self
I13	13.0421	self
I14	13.1995	self
I14	11.2312	self
I14	8.64095	self
I13	12.045	self
I13	13.3655	self
I14	14.2194	other
I13	13.0381	self
I13	9.96811	self
I14	17.7555	self
I14	10.8002	self
I13	14.8663	self
I13	10.2644	other
I15	13.6001	other
I14	13.3713	other
I13	11.6452	other
I6	14.3855	other
I14	8.30959	self
I14	16.7399	self
I13	17.5877	self
I13	12.8443	self
I14	14.8132	self
I13	11.3429	other
I14	21.2867	other
I14	6.57113	self
I14	13.7013	self
I14	11.101	self
I13	22.3231	self
I14	8.36597	self
I13	14.6436	self
I14	9.55254	self
I14	14.0392	self
I14	9.56585	self
I14	13.1577	self
I13	13.228	self
I13	8.78954	self
I13	6.30523	self
I13	15.0247	other
I13	9.88865	self
I13	17.1328	self
I13	20.6314	self
I13	15.5145	self
I14	11.0155	other
I13	14.4581	self
I14	14.734	self
I14	13.2055	self
I13	14.0404	other
I13	8.37247	self
I13	21.9386	self
I14	16.7013	self
I13	13.2542	self
I13	17.7202	self
I14	16.0762	other
I13	15.4886	other
I14	9.78498	self
I14	10.1424	self
I13	9.70059	self
I14	10.6611	self
I13	21.3996	self
I13	21.0867	other
I13	17.404	self
I13	15.8372	other
I14	9.13061	self
I13	12.9148	self
I14	13.335	self
I14	15.6269	self
I14	14.7541	self
I13	8.76869	self
I13	13.6234	other
I14	11.2289	self
I11	31.8416	other
I13	13.483	other
I13	16.0764	self
I13	10.417	self
I13	13.5798	self
I13	13.0418	self
I13	17.4558	self
I13	9.34612	self
I14	7.83127	self
I13	10.0767	self
I13	13.6736	self
I13	12.6708	other
I13	15.4904	self
I13	17.5105	self
I14	12.4448	self
I14	12.3799	self
I13	15.5787	self
I14	9.13061	self
I14	13.3619	self
I13	13.8479	self
I13	10.6725	other
I14	15.5394	self
I13	13.4291	other
I14	12.5957	self
I13	20.6314	self
I14	13.1283	self
I14	9.0848	self
I13	11.3126	other
I14	12.087	self
I14	18.2462	self
I14	10.8985	self
I14	11.6572	self
I13	14.4907	self
I13	14.2922	other
I14	10.502	self
I13	17.4498	self
I13	13.3655	self
I13	17.9295	other
I13	12.854	other
I13	10.1338	other
I13	7.31726	self
I14	7.52065	self
I13	15.4868	self
I13	14.5855	self
I14	12.2672	self
I14	15.1596	other
I13	12.0935	self
I14	13.483	other
I14	10.8884	self
I14	12.6389	other
I14	10.7968	self
I14	12.6002	self
I14	10.3013	self
I14	6.57113	self
I13	11.3902	self
I14	8.41452	self
I14	10.0831	self
I14	7.47022	self
I13	15.6285	self
I14	21.5184	other
I14	15.6104	self
I13	11.2256	other
I14	13.5504	self
I14	10.526	self
I13	15.0745	self
I14	8.56424	self
I13	12.6597	self
I13	12.0292	self
I14	13.5027	self
I14	10.3388	self
I14	10.7968	self
I13	23.5267	self
I14	8.23475	self
I14	12.8575	self
I14	10.526	self
I13	11.3193	other
I14	14.9256	other
I14	19.0807	self
I1	32.7936	other
I13	18.7729	self
I13	17.4393	self
I14	13.6589	other
I14	7.98737	self
I13	15.3107	other
I13	11.2667	other
I13	10.662	other
I14	13.9538	self
I14	15.5278	self
I14	14.4627	self
I14	15.2798	self
I14	16.496	other
I13	16.9671	self
I13	9.2534	self
I14	10.8321	self
I13	31.1269	self
I13	12.9429	self
I13	12.4787	other
I13	11.26	self
I13	13.8479	self
I14	12.3405	self
I14	9.02642	self
I13	15.5961	self
I14	13.1225	self
I14	15.6516	other
I13	16.5468	other
I14	10.8884	self
I14	10.8926	self
I14	12.3515	self
I14	12.2444	self
I13	16.5707	other
I13	12.6389	other
I14	15.6477	self
I14	16.9213	self
I13	23.1265	self
I13	23.4297	self
I14	12.8209	self
I14	12.81	self
I14	9.81625	self
I14	18.3592	other
I13	20.1793	self
I4	12.7928	other
I14	8.74412	self
I13	13.555	other
I13	12.3694	self
I14	14.5995	self
I13	23.1671	self
I13	13.5135	self
I19	27.9598	other
I13	13.4266	self
I13	13.8097	self
I14	13.134	self
I1	17.6169	self
I9	11.9474	other
I9	15.5398	other
I13	13.1515	self
I9	19.2179	self
I1	8.524	self
I17	15.9475	other
I1	14.3292	self
I6	18.3283	other
I1	16.6458	other
I17	17.5943	other
I24	15.8712	other
I1	31.57	other
I13	14.1514	other
I1	8.8561	self
I13	19.3393	self
I17	14.1514	other
I1	12.5236	other
I13	15.062	other
I6	11.7508	other
I9	12.9711	other
I1	17.3103	self
I6	18.0392	other
I25	17.0559	other
I12	22.7426	other
I13	20.3415	self
I9	10.8656	self
I12	29.3379	other
I1	12.6084	self
I9	14.2142	other
I1	15.9585	other
I25	15.1727	other
I3	15.3079	other
I1	15.5398	other
I9	13.0061	self
I13	16.0558	other
I1	6.4177	other
I1	12.0976	self
I1	9.93986	self
I6	14.5096	other
I6	14.9017	other
I13	6.4177	other
I22	10.2942	other
I25	15.132	other
I20	16.6503	other
I1	9.11505	other
I6	14.3798	other
I13	26.5423	other
I1	8.45179	self
I24	12.6698	other
I9	21.7628	other
I13	8.52682	other
I13	10.8619	self
I9	10.8656	self
I1	9.93986	self
I1	12.9711	other
I11	20.1475	other
I1	10.0421	self
I17	15.6127	other
I13	11.8852	other
I9	9.11505	other
I9	14.9719	other
I13	13.1515	self
I9	14.4259	other
I1	11.0846	other
I1	9.46934	other
I10	12.2746	other
I9	13.033	other
I25	14.9101	other
I13	13.0525	self
I6	22.6158	other
I1	11.5084	other
I13	19.5819	other
I12	16.795	other
I1	17.3488	self
I1	10.6514	self
I1	15.879	other
I13	10.8619	self
I13	15.9864	self
I1	5.97247	other
I19	20.3391	other
I6	13.4293	other
I1	16.4214	other
I6	12.5766	other
I9	14.9072	other
I11	5.97247	other
I1	11.5394	self
I1	16.1711	self
I1	20.5051	self
I1	12.0976	self
I6	19.3086	other
I13	21.0924	self
I1	13.7386	other
I1	7.28032	other
I11	20.8887	other
I7	13.981	other
I25	24.3937	other
I1	13.2312	other
I1	10.4849	other
I9	5.43541	self
I3	14.8653	other
I9	24.1195	other
I9	19.3497	other
I24	10.7762	other
I1	14.3292	self
I17	15.0546	other
I17	13.9838	other
I14	17.5883	self
I1	11.6036	other
I13	11.3902	self
I13	12.4743	self
I13	13.9952	self
I1	17.3103	self
I1	13.775	other
I11	11.1241	other
I1	21.8969	other
I24	7.25575	self
I11	9.03789	self
I12	22.5758	other
I9	22.2626	other
I1	11.8692	self
I1	12.7172	self
I1	18.2867	self
I13	18.2181	self
I6	18.3189	other
I12	14.3422	other
I11	14.7965	other
I25	14.8464	other
I1	12.9918	self
I9	8.01271	other
I1	11.903	self
I13	18.2854	self
I14	20.7883	other
I9	15.3973	other
I1	12.6811	other
I25	22.4445	other
I12	10.4849	other
I13	12.7355	other
I25	17.6663	other
I12	13.0019	other
I9	15.1044	other
I1	21.5902	other
I9	5.43541	self
I6	21.7718	other
I17	19.5971	other
I1	21.7786	other
I24	20.8387	other
I1	15.0284	self
I1	15.6729	other
I1	14.4069	self
I1	11.0308	other
I6	17.1641	other
I1	16.1916	self
I1	10.3566	other
I9	19.4053	other
I13	17.1283	other
I13	9.58071	self
I3	9.21842	other
I13	10.6664	self
I13	13.9952	self
I1	8.07785	other
I13	16.9507	self
I9	13.8258	other
I1	9.2747	other
I1	17.0559	other
I1	16.6908	other
I11	18.1678	other
I1	13.809	self
I1	12.8978	other
I24	19.3246	other
I6	11.5857	other
I9	11.5084	other
I11	13.5747	other
I1	8.45179	self
I1	12.9972	other
I14	11.0482	other
I9	10.3566	other
I13	14.229	self
I13	8.56271	other
I1	17.6161	self
I12	17.3433	other
I23	17.3266	other
I1	13.1746	self
I6	11.0846	other
I1	14.8739	self
I1	7.35289	self
I9	20.0173	other
I9	21.4984	other
I13	16.3796	other
I1	17.9364	other
I14	18.2385	other
I1	15.8254	self
I1	8.8561	self
I1	11.0176	other
I13	8.76869	self
I11	9.03789	self
I9	15.0321	other
I1	11.6893	self
I6	10.9347	other
I9	18.285	self
I6	14.6082	other
I21	14.9072	other
I1	12.4272	self
I1	16.1711	self
I14	14.561	other
I1	19.2813	other
I1	13.8847	self
I1	15.0321	other
I11	8.9798	other
I13	10.2141	other
I9	10.9347	other
I13	8.27081	other
I1	12.223	other
I5	9.46934	other
I13	12.8577	other
I1	12.3655	self
I13	16.9243	other
I6	9.75648	other
I1	7.78026	other
I1	15.1939	self
I13	13.4992	self
I12	22.0921	other
I9	9.2747	other
I25	14.3326	other
I1	14.4985	self
I13	16.175	self
I1	8.7665	self
I1	11.5394	self
I14	20.2021	other
I1	14.4364	other
I9	9.75648	other
I13	14.561	other
I1	9.73779	other
I1	17.4975	self
I20	13.5635	other
I12	13.4082	other
I1	10.9284	self
I9	17.9592	other
I13	19.3497	other
I4	12.2746	other
I25	7.10957	other
I1	15.3973	other
I1	10.6938	self
I1	8.524	self
I13	12.4743	self
I1	10.3295	other
I11	14.9017	other
I6	8.07785	other
I1	10.7762	other
I1	10.0421	self
I11	5.95101	other
I1	19.9782	self
I13	26.1816	self
I13	10.7554	other
I9	10.8704	other
I1	11.8692	self
I13	13.0525	self
I1	14.055	other
I17	14.5096	other
I1	13.8866	other
I9	13.2312	other
I13	11.5057	other
I1	13.378	other
I9	9.13606	other
I1	16.5862	other
I13	24.065	other
I9	21.611	self
I13	23.6144	other
I1	17.8428	self
I1	12.9191	self
I1	10.6938	self
I6	8.9798	other
I3	19.6112	other
I11	19.2923	other
I13	15.4528	other
I1	9.75904	other
I1	10.9284	self
I18	18.0881	other
I9	15.7396	other
I1	15.4263	self
I19	8.89736	other
I13	28.3617	self
I13	15.1346	self
I12	11.9591	other
I12	12.5766	other
I13	10.6664	self
I1	25.924	other
I1	19.9782	self
I12	19.5635	other
I13	15.9864	self
I1	8.49031	other
I12	12.5463	other
I1	10.6514	self
I13	24.0565	self
I17	18.9616	other
I11	14.6929	other
I13	16.4581	other
I9	13.4293	other
I1	15.1939	self
I9	13.0019	other
I13	14.6082	other
I1	16.1015	self
I25	15.1854	other
I1	12.5288	self
I10	13.4031	other
I13	15.9597	other
I1	22.1652	self
I9	9.28197	other
I13	5.41374	other
I1	11.4709	self
I1	11.726	self
I1	16.638	self
I1	11.6372	self
I9	13.664	other
I1	20.0761	other
I1	11.0561	self
I4	13.1105	other
I1	13.5883	self
I24	14.0438	other
I1	13.0502	other
I1	16.9348	self
I1	15.8524	other
I1	12.4455	other
I24	7.25575	self
I1	13.1892	self
I1	17.6612	self
I1	18.0048	self
I25	20.0092	other
I1	15.9311	self
I1	13.0067	other
I1	10.8145	self
I1	8.88316	self
I1	9.25691	self
I1	21.4571	other
I25	22.9796	other
I1	11.853	self
I17	16.2272	other
I1	5.7949	self
I1	11.4953	self
I1	15.0048	self
I1	15.9207	self
I1	9.89457	self
I9	11.0757	other
I13	13.5341	self
I17	19.8758	other
I9	16.5504	other
I1	16.2501	other
I1	11.5426	self
I1	12.785	self
I6	6.83817	other
I1	12.2492	self
I1	17.1648	other
I1	14.7243	self
I1	13.5374	self
I1	8.92671	other
I1	16.6484	other
I1	11.9418	other
I1	15.1405	self
I1	10.8083	other
I1	26.3119	other
I1	6.89745	other
I13	26.9073	other
I1	17.03	other
I25	22.4351	other
I9	11.4206	other
I1	12.8798	other
I1	17.4787	other
I1	19.0589	self
I1	9.89457	self
I11	20.2291	other
I12	26.5457	other
I1	15.6743	self
I1	14.8017	self
I1	13.0673	other
I1	18.995	other
I1	10.9975	self
I1	10.8585	self
I1	15.5431	other
I1	13.2771	self
I19	23.1692	other
I1	10.8114	self
I1	12.5636	self
I1	7.35289	self
I1	12.5006	self
I9	6.7695	other
I1	19.3531	other
I1	16.9524	other
I7	17.7292	other
I1	14.7243	self
I1	26.0602	other
I1	16.6634	self
I17	24.5279	other
I1	16.1891	other
I9	18.2918	other
I3	9.79034	other
I11	27.1196	other
I1	17.2332	self
I1	14.1082	self
I1	10.1534	other
I1	15.773	self
I1	11.85	self
I1	14.4464	other
I1	19.5924	self
I1	21.5248	self
I1	16.2727	other
I6	11.238	other
I12	11.5643	self
I9	15.1771	other
I1	14.7762	self
I1	11.4709	self
I8	6.7695	other
I14	25.1249	other
I1	16.7506	other
I1	13.5224	self
I1	14.8214	other
I1	17.6612	self
I1	17.6612	self
I1	14.6086	self
I1	16.0377	self
I1	10.0815	self
I1	17.8838	self
I1	11.7365	self
I1	8.32268	self
I1	8.79516	self
I1	17.5835	self
I1	14.6245	other
I1	17.3099	self
I1	21.8937	other
I9	9.33715	other
I1	12.2492	self
I19	15.5945	other
I6	13.8561	other
I9	9.17184	self
I1	13.8755	other
I13	20.4215	other
I10	10.8367	other
I1	5.55546	self
I1	23.244	self
I1	15.0569	other
I19	7.78026	other
I1	15.867	other
I1	13.1892	self
I1	24.0959	other
I1	19.6162	self
I1	14.7762	self
I25	10.3293	other
I24	15.6945	other
I24	22.158	other
I11	8.34283	other
I1	15.1229	other
I1	11.832	other
I1	15.3694	self
I20	21.4797	other
I1	10.3925	other
I1	11.7416	self
I1	10.9975	self
I1	14.4231	other
I1	15.7486	self
I13	13.5341	self
I1	22.5538	other
I1	13.1105	other
I9	14.3355	other
I1	14.2323	other
I12	17.6702	other
I1	10.6629	self
I1	12.2891	other
I1	10.8585	self
I1	13.9281	other
I1	12.0473	other
I1	11.4314	other
I9	18.8679	other
I1	11.85	self
I1	10.0413	self
I1	16.0697	other
I1	20.0993	other
I17	17.448	other
I1	11.6554	self
I1	17.8904	other
I1	14.7396	self
I1	15.038	self
I1	17.3109	other
I1	15.2233	other
I1	14.7263	other
I1	11.3861	self
I9	18.4248	other
I1	19.0136	self
I1	15.1746	other
I1	12.5667	self
I1	12.6219	self
I1	11.3907	self
I1	13.3358	self
I13	18.6863	other
I1	15.4035	self
I25	15.6008	other
I1	19.776	other
I24	17.105	other
I17	14.0438	other
I1	12.8292	other
I1	12.9192	other
I1	10.6629	self
I1	6.83817	other
I12	20.9121	other
I1	9.93883	other
I1	19.6435	other
I1	13.9185	other
I1	20.6039	other
I1	20.0092	other
I24	17.6627	other
I1	14.7573	self
I1	18.493	other
I1	8.97401	self
I12	26.0063	other
I1	10.5784	self
I19	22.0583	other
I1	8.88316	self
I1	11.1924	self
I1	19.3806	self
I1	18.2674	self
I1	18.1324	other
I1	21.232	other
I6	22.7196	other
I1	10.6963	self
I16	19.3636	other
I11	7.10957	other
I1	14.8055	self
I1	7.37248	self
I1	10.9373	self
I12	15.7555	other
I13	10.3293	other
I1	16.2279	self
I1	16.6414	self
I1	9.9756	self
I1	11.179	self
I1	16.157	self
I24	19.5041	other
I11	17.3925	other
I19	11.5445	other
I1	5.55546	self
I1	11.7508	other
I24	16.6422	other
I1	10.5052	self
I1	10.5784	self
I1	14.5592	self
I1	17.4763	self
I11	15.854	other
I1	10.3778	self
I1	15.5754	self
I6	13.7822	other
I1	13.8392	other
I1	14.6085	self
I1	8.80793	self
I1	14.7396	self
I1	20.9707	other
I11	17.619	other
I13	11.4314	other
I9	15.4924	other
I1	18.4147	self
I10	15.9229	other
I25	15.9171	other
I1	13.3516	self
I24	17.3925	other
I1	15.4176	self
I1	14.8266	other
I1	10.4036	self
I1	13.4031	other
I1	17.9508	other
I1	19.4193	other
I12	26.453	other
I9	15.1746	other
I1	8.97401	self
I1	11.5426	self
I1	13.8599	self
I9	13.6598	other
I11	8.62895	other
I1	18.6432	other
I11	13.376	other
I1	17.3112	self
I25	18.3055	other
I9	15.1856	other
I1	12.5667	self
I6	15.7391	other
I1	11.3907	self
I12	15.0493	other
I1	18.6015	other
I1	9.703	other
I1	14.0941	self
I1	16.7084	self
I12	12.76	other
I1	12.0908	other
I1	14.8011	self
I24	14.5842	other
I1	11.1924	self
I1	15.578	other
I1	20.5272	self
I1	27.1182	self
I1	20.3646	other
I1	10.5052	self
I9	21.9426	other
I1	14.4002	self
I1	10.9373	self
I9	14.9756	other
I1	12.8165	self
I13	6.56255	self
I1	9.79034	other
I1	5.7949	self
I1	15.1318	self
I1	15.4308	other
I1	9.33715	other
I1	15.4176	self
I1	17.5601	self
I1	7.37248	self
I1	12.5636	self
I9	13.6205	other
I9	12.8292	other
I1	10.4377	other
I1	19.2943	other
I1	10.215	other
I1	19.6436	self
I1	17.3099	self
I1	18.2505	other
I1	17.3745	other
I1	12.9642	self
I1	11.4953	self
I6	11.102	other
I9	13.7822	other
I1	12.7507	self
I1	11.6766	self
I1	11.1032	self
I1	25.035	self
I13	5.95101	other
I3	9.38707	self
I1	11.7416	self
I1	12.6219	self
I9	15.0041	other
I1	12.796	self
I1	11.4206	other
I1	14.5466	other
I1	15.6356	other
I1	17.8157	self
I1	11.7365	self
I1	19.5073	other
I13	18.9314	other
I1	19.2266	other
I1	12.5006	self
I1	13.1639	self
I1	16.9564	self
I24	14.7263	other
I1	12.7434	other
I1	16.6442	self
I24	13.8561	other
I1	11.726	self
I1	10.6963	self
I12	17.7399	other
I13	8.00947	other
I17	8.69539	self
I9	9.17184	self
I1	11.102	other
I1	15.9917	self
I1	15.0514	self
I9	14.2159	other
I1	10.0815	self
I1	14.6085	self
I1	19.2401	other
I1	16.2563	self
I1	19.8758	other
I13	16.2897	other
I9	11.9669	other
I10	13.3362	other
I1	7.57048	other
I1	10.4036	self
I1	9.9756	self
I1	11.179	self
I1	8.40845	self
I1	17.3856	self
I1	11.1075	other
I1	13.5883	self
I1	14.8017	self
I1	16.0572	self
I1	13.5224	self
I1	12.5288	self
I1	15.5734	self
I9	18.3241	other
I19	15.4924	other
I6	12.8098	other
I1	11.1556	self
I1	17.9712	self
I1	15.5754	self
I12	11.6727	other
[truncated: 30,185 more rows]

## Sheet: Figure 3h
nearest neighbor distance (um)
12.6945
10.6378
9.97505
19.5125
6.81596
22.1819
10.1611
7.58797
15.8951
8.51963
22.9252
9.51617
13.2967
21.8981
12.3719
15.6965
7.71551
9.31941
21.4367
12.4267
9.54279
9.57139
17.4898
11.4234
10.1611
12.4897
16.5468
12.3351
12.8064
7.92881
36.7934
13.1239
8.31122
14.2106
21.7608
7.19901
11.8912
21.4367
21.2722
9.23905
10.6456
14.4379
10.9663
9.75713
22.2853
9.63438
13.1048
10.9652
17.9543
12.3789
13.4784
6.40054
20.2305
9.12628
10.6962
24.0083
7.92881
22.9252
10.4987
8.85349
7.58797
10.7137
11.975
9.98612
13.8088
8.94422
8.52969
15.5648
14.8916
8.94422
7.28548
8.79045
10.8594
7.28548
13.8088
13.6416
6.40054
18.4646
10.6962
19.7812
13.4784
16.6059
10.1099
17.5
10.0482
8.91699
7.94208
10.1125
10.8439
26.6902
10.859
9.98612
10.4132
14.4379
24.8129
9.63438
7.94208
19.5289
11.6958
8.85771
8.51963
9.97505
13.2288
9.70219
15.473
19.004
15.1961
17.226
10.1689
10.0936
25.3228
10.7137
12.008
9.85263
9.57139
11.008
22.0809
43.9628
12.4018
11.9005
13.6416
16.605
8.85771
18.2508
15.7635
8.3273
19.1602
8.45105
9.45289
16.538
21.9059
6.9868
12.7856
8.36722
16.0558
11.008
9.90124
7.19901
8.31122
12.3351
7.71551
10.2284
9.4809
10.0936
21.2321
11.0482
31.2561
14.1305
8.91699
9.51617
15.7635
27.1033
8.36722
15.22
8.3273
10.9949
12.8907
6.81596
10.0751
10.4132
8.38816
10.8168
16.0644
19.2923
13.499
17.2013
7.22622
17.2382
23.9082
11.3537
12.6632
15.6127
12.2523
12.6698
18.575
21.4797
11.8852
11.024
9.07837
14.6748
16.8079
12.094
13.6923
15.4337
17.1003
12.7845
13.981
16.5688
20.615
15.3079
15.4825
12.2427
10.4697
12.0816
12.2397
21.0722
16.7369
7.73867
23.9682
9.28215
16.9434
16.1124
16.318
15.0546
15.7396
13.3956
12.2685
20.9519
17.0252
13.2289
11.1444
17.7939
16.7214
16.7214
5.91549
12.223
9.9536
11.8485
14.9807
17.5465
12.8409
17.7939
12.8268
19.8547
13.9727
17.1882
14.4967
27.876
9.59289
16.5755
12.9407
20.6451
10.9841
8.95767
12.9972
9.83193
14.1667
14.247
20.6524
8.91108
16.5755
22.5002
13.5635
24.1716
12.5069
15.8627
21.3036
16.2774
19.4437
18.394
15.1528
14.6863
12.1212
18.2385
16.8423
8.92416
22.0487
16.0439
23.3765
10.7807
6.49833
10.2942
10.3486
14.9542
10.9644
22.7713
14.9003
12.5236
22.7713
21.8967
20.0029
21.317
16.96
14.5261
22.8928
12.9098
26.4317
15.8627
10.2141
11.8995
17.682
16.1991
14.6693
14.7965
10.6833
11.1241
21.6837
11.3677
10.1888
20.3778
28.5879
24.4745
14.2745
11.024
17.4775
11.3935
15.9855
8.49031
18.8827
10.4843
14.3422
14.4489
16.0113
19.3654
13.6312
9.73779
9.65197
26.5157
16.0113
11.8016
10.9356
15.4922
10.936
12.0541
11.8115
12.6735
12.6735
15.7931
5.55523
11.3537
14.4362
7.83374
9.9536
11.9939
20.1688
20.9534
10.6502
15.4195
17.4553
23.1147
7.7692
17.7884
18.0397
13.1269
16.4905
16.6503
14.6019
17.0102
14.0087
12.1481
22.0682
13.6577
13.474
14.6526
14.4648
12.6811
19.3348
15.5393
12.2523
14.1515
14.3422
7.22622
11.8485
14.8307
13.4064
12.0233
12.0069
15.41
16.5029
14.4967
15.1942
11.3677
17.1003
21.2279
8.68211
15.6634
20.6524
14.7559
16.0845
21.1613
20.3391
12.5493
14.6526
23.0814
10.2292
20.8887
8.52682
14.6812
23.0482
11.2947
9.21842
10.1888
13.5747
8.56492
21.1693
14.6856
19.5059
14.4259
14.034
22.8604
13.2917
16.8241
10.9356
9.45396
11.2737
10.0018
14.5319
13.4806
16.5501
18.2621
18.5053
14.9003
14.7783
26.24
21.0401
20.6069
20.1965
13.6745
10.936
19.6954
12.1091
9.52869
23.1147
18.2127
12.8409
11.2737
23.9596
14.1667
12.7355
12.1212
10.3486
9.77059
13.9866
21.6089
12.8978
15.4566
15.879
12.2703
11.3935
16.3407
12.3143
10.0564
22.2626
13.5768
15.9475
25.4692
13.8063
25.8346
19.8398
14.2607
8.97557
7.37802
8.83999
15.9579
25.4655
20.145
15.621
10.9644
15.1942
11.3891
18.1653
16.857
14.3798
14.5779
15.1528
9.20204
10.4697
22.1963
17.9794
8.73889
14.4648
18.8652
10.6833
15.8772
9.07837
23.1452
10.5824
12.6085
15.7006
11.9939
22.8203
11.3282
12.9248
15.4781
7.91706
17.0802
8.4066
5.55523
22.7341
18.458
22.1327
9.86986
17.1882
16.5187
15.9591
10.7807
9.28215
21.506
15.5323
12.7792
16.342
9.72784
13.5768
23.7462
8.4066
27.4137
24.6391
11.6036
13.9727
13.5761
21.8772
20.9809
8.91108
18.6141
12.5336
16.5878
9.66133
13.8463
11.398
15.0945
12.9407
23.5557
13.0885
10.2479
24.4397
12.5012
24.8605
20.673
16.0439
21.6288
12.6632
14.2745
21.1103
16.9104
12.7204
19.8087
14.4364
19.8398
13.9866
5.91549
18.0397
15.4337
16.5935
14.2187
7.87207
15.8712
20.4217
10.4651
18.0449
28.9164
13.474
14.5224
13.6997
7.83374
14.6929
16.3115
11.9591
20.7614
12.8268
8.27081
21.7132
9.77059
48.1618
15.2919
21.6631
15.1151
11.7836
6.49833
16.7024
9.72198
10.2958
14.6285
12.5069
20.7033
17.816
25.2861
12.1212
13.789
9.2854
10.8704
12.5012
12.3143
7.73867
11.8115
10.7554
25.4875
13.5703
17.8914
8.1122
9.40969
12.2962
10.0355
13.9838
15.1782
11.2947
14.144
16.9601
12.3895
12.2685
11.8016
8.86717
21.2768
12.2397
13.7168
16.0644
15.3687
18.8437
12.1091
18.8652
9.40969
27.6942
14.2961
12.2427
14.6812
18.6446
26.1504
7.37802
19.8679
11.2024
9.72784
16.9009
10.4651
11.5857
16.6458
11.5057
26.6714
17.4553
14.4312
16.3148
7.28032
11.0308
15.9748
23.9525
20.0173
21.6506
12.9248
15.0962
17.9235
19.8367
24.6207
21.2549
17.0802
19.3654
28.0297
8.86717
9.72198
11.9474
14.3326
16.6908
13.6745
19.5374
10.1707
10.0564
11.4235
19.4475
23.1275
12.9598
15.0962
22.2938
14.3422
9.65197
9.61219
19.2811
12.3143
11.1107
10.8859
14.2961
19.4437
18.8055
21.5987
8.17786
7.87207
15.9855
9.2854
14.5779
12.5463
25.4179
13.8258
8.1122
19.7295
17.4775
23.503
9.84706
23.1265
25.4655
13.5374
10.5824
23.8106
12.7204
21.4904
8.89736
25.4875
12.0541
16.9009
14.642
11.1444
18.6141
13.5443
21.6326
16.5187
12.6085
11.2112
13.2289
16.8423
21.8646
12.3143
17.5691
21.7489
12.7107
28.9286
17.5174
17.0472
8.68211
20.5131
21.8871
10.4843
14.5685
16.494
12.0069
12.1164
20.2507
8.01271
8.97557
22.255
9.83193
13.789
21.8342
23.4322
14.6863
15.0714
20.8012
13.3956
11.4235
7.7692
15.4922
11.3282
10.3295
20.0664
12.2962
8.95767
14.1515
15.266
12.0233
21.9832
14.7239
14.7697
23.7814
9.22024
18.3165
15.6486
11.2147
19.5345
10.676
14.8466
25.9616
13.8428
19.2943
13.976
20.5531
18.4282
15.3092
14.7796
21.4777
13.9856
14.7796
8.86325
10.676
26.9073
19.9245
18.5875
21.4428
9.43661
16.6709
21.4926
10.1191
21.37
8.86325
17.8904
9.30722
12.3895
15.442
17.4736
15.5431
12.8786
13.0502
11.1727
14.6818
16.4585
17.7269
18.9314
12.2611
20.1067
12.5477
16.2501
18.9636
13.418
16.8371
16.8371
19.1532
13.457
13.664
11.2147
17.6592
22.4819
20.9707
13.9797
13.4942
19.7941
12.9145
23.9067
17.746
10.1406
17.2088
9.84604
23.8725
17.105
10.2774
14.637
14.0097
23.3857
8.09053
10.1534
13.1103
17.8821
18.906
19.3076
27.8333
14.0803
19.3176
13.2451
9.67388
10.5923
29.1086
25.8132
18.5918
20.6029
25.5888
19.9577
15.649
11.594
26.3119
16.2314
15.1229
37.1118
23.3265
15.1856
13.9087
13.0927
18.4248
15.6102
14.1669
25.3801
15.6945
15.0638
23.0641
17.509
20.9029
18.3239
17.1793
18.4282
11.5445
22.5382
21.3768
21.2532
16.27
15.3848
19.6389
14.8466
20.3617
25.8079
17.8096
21.1398
16.7525
24.426
9.65554
15.6102
27.6349
17.3745
11.594
12.2891
16.855
16.9283
9.93883
9.21637
11.6352
14.4739
13.8755
10.464
10.6921
10.5923
14.8214
15.29
19.968
13.4806
27.0904
19.5497
13.0927
26.9243
19.9896
19.7341
11.8778
14.9381
11.8841
23.5607
15.2929
17.0334
9.84604
26.4718
25.498
26.9742
16.2727
12.6901
24.6676
13.418
13.6205
11.2243
11.0603
10.6921
10.4038
19.4188
9.703
21.1558
9.22024
25.9543
21.6881
12.76
13.8196
14.1996
10.5001
16.1449
11.4999
16.2314
16.922
19.9577
15.6466
10.464
13.0078
15.4966
18.6257
18.3165
16.4095
20.2291
15.4966
15.0577
9.59289
24.4301
19.8374
13.5238
6.89745
14.454
10.2459
16.0042
13.218
20.5052
15.7555
20.3733
23.3242
6.95111
22.4782
14.853
12.8798
25.8432
9.20204
10.1765
22.4351
9.30722
9.39735
13.9797
11.7002
20.8829
11.1727
13.3446
13.3077
25.0934
13.1603
8.00947
15.2222
13.457
13.0673
11.9418
11.5229
15.8349
22.458
22.7397
16.7525
12.8786
17.693
18.2245
24.6499
13.9087
9.56702
15.649
16.0508
13.6598
27.7254
17.2088
11.3044
17.5205
17.193
11.9669
17.6521
22.8235
17.0316
19.9936
10.2774
10.3925
10.4038
17.4246
13.7796
11.6727
22.4819
19.3531
19.2079
11.2644
20.1056
15.5452
17.4366
15.1849
14.9
10.1191
18.8679
13.0078
13.3077
24.6981
17.0955
7.44292
27.5902
9.774
15.7524
24.3643
11.2644
14.2187
11.5055
21.1398
11.2243
17.707
23.0561
10.5001
17.8821
18.6401
20.3787
10.4377
37.7692
15.0999
15.6486
7.36395
21.7279
19.78
10.257
13.6081
14.4464
18.3702
15.854
15.6475
15.0597
18.493
15.3092
13.9185
17.9956
23.9932
19.2174
21.2833
29.1295
11.5055
12.2611
14.7127
9.31314
13.5238
15.2483
20.5736
27.2234
14.8266
17.619
21.8445
17.6627
19.256
16.3244
11.0757
16.3244
15.641
8.17786
15.8559
9.67388
17.2448
14.4231
13.218
10.1406
19.2079
19.1568
11.3044
19.3076
20.643
15.0946
9.45396
14.2794
12.6991
26.402
13.0067
16.5678
12.8148
13.6345
16.6656
11.9458
10.257
24.6499
20.5134
29.7826
9.21637
9.39735
19.256
8.51696
15.1849
7.78464
14.7127
15.7524
11.832
18.3451
19.4153
17.5583
16.1962
13.976
20.9121
23.7023
23.0027
16.6484
14.1669
14.6533
22.8235
7.57048
12.0908
14.6245
10.2459
8.21031
16.1891
18.5724
17.9508
17.4383
17.2577
24.6981
18.2394
10.745
21.9951
11.2045
29.8284
14.637
9.65554
14.8252
13.5433
17.4736
12.6901
14.2323
9.28197
15.0999
19.6389
17.3738
23.2058
11.2643
11.2643
17.9956
21.7739
8.92416
13.3362
22.0582
12.9149
13.8392
13.2424
15.0569
18.3729
15.6008
22.5458
13.2424
11.0603
16.27
15.6803
23.3265
7.44292
10.8083
19.161
15.578
17.6702
15.8524
11.1075
13.1603
8.92671
17.6962
16.0326
15.8742
14.1996
13.0297
15.8078
19.7747
8.75229
17.5312
16.7299
16.1607
12.7056
15.3409
16.2346
28.9344
21.6592
15.1478
19.4355
16.9916
22.4905
8.81029
9.70657
15.6774
14.788
16.7973
14.9381
14.7971
21.7904
17.7882
26.0136
19.6421
9.77082
14.8927
19.4355
23.9067
11.0952
17.26
14.2477
13.0297
16.1972
15.2997
14.0097
11.5671
20.1222
22.3839
26.3557
8.08258
18.4951
17.1375
11.56
14.9277
14.8278
11.443
13.9333
18.2446
20.3663
19.2427
12.6052
16.5793
21.6499
11.56
14.3758
14.0835
13.9271
19.2608
12.4505
15.9602
23.9786
18.7114
24.8787
14.7435
13.7238
17.7688
18.3072
15.0795
10.6371
14.984
15.586
12.0209
7.54157
6.5936
13.7817
10.7232
19.5108
17.5801
18.5047
16.914
11.0781
17.019
7.21968
19.9972
18.9448
14.1846
14.7245
14.1613
12.0015
11.5169
18.666
18.7245
14.964
15.1966
16.7989
14.1613
19.2932
12.175
14.1409
10.7135
7.55393
25.0791
7.55393
19.2608
19.463
13.5957
9.77082
11.2083
18.1335
12.5142
15.8243
16.6292
16.4148
10.8366
22.3915
16.7681
15.524
15.0041
18.6074
7.879
14.26
14.2899
17.1113
15.8654
15.8645
12.9052
15.8654
20.3323
10.7714
13.9045
22.8452
12.975
8.09053
7.78464
7.51585
12.9272
10.1503
17.1108
20.0559
15.7585
14.964
14.2927
15.0137
20.1486
24.7676
15.563
12.3097
11.7702
14.0392
11.8493
17.0878
16.0844
8.19199
18.8529
11.296
15.8586
14.4969
24.6758
20.3411
12.8442
11.9985
18.9579
10.1981
18.3211
13.7238
21.5248
17.7688
12.6341
18.1371
25.2612
14.4214
7.879
13.6935
27.94
13.6017
17.9815
19.4202
25.8745
16.453
10.9766
17.6593
17.86
16.0844
14.788
17.1604
21.5402
19.9062
14.8121
17.3966
9.28396
12.9052
22.6453
19.6813
15.5278
15.8454
15.1941
10.7714
16.7989
14.4214
23.2457
20.2706
18.553
18.4956
11.8712
13.3241
7.36395
14.0598
13.2791
21.1469
14.4879
20.6017
23.4469
20.0663
16.1108
20.6
18.8912
15.0269
19.8627
16.3917
20.7984
19.373
14.4879
17.4413
13.5307
36.94
16.1161
14.78
14.5466
21.0945
21.547
18.6525
17.4325
20.3127
11.9985
15.3252
16.9942
17.9257
18.3552
14.1321
13.3524
10.6509
24.8094
22.5008
13.9693
14.142
12.5122
6.5936
16.9942
10.5892
14.1323
17.9167
14.5186
20.0411
27.1152
19.7094
22.022
10.8105
12.0209
16.075
11.6888
12.6105
15.6442
11.3396
22.5628
12.4505
13.3241
22.9553
16.1713
9.22184
22.7664
24.8565
9.22427
12.5127
18.9801
15.3613
13.9271
8.19199
22.8267
22.6446
16.9828
22.4819
15.9871
11.8232
8.15952
26.9282
15.4723
14.9422
13.8576
16.7718
23.0037
18.3072
13.4462
13.6866
20.8037
14.2899
20.7407
20.8627
19.6635
21.9813
10.4767
19.9407
6.26912
14.462
11.443
9.50191
17.7568
14.8278
18.55
15.2513
15.2013
21.8098
17.3966
13.1661
19.8809
15.1616
15.586
17.0043
7.87172
19.1537
13.5295
14.9104
9.47043
20.3507
16.4884
15.1616
15.3598
11.6888
20.6518
10.7232
11.1086
13.5835
14.1981
22.9355
14.6693
17.6593
22.426
16.2346
21.2035
16.4776
15.0194
13.9693
14.8121
10.777
16.1972
18.769
11.4075
16.5882
9.50191
20.0246
18.3973
18.8932
14.1323
10.6371
15.816
10.9766
26.4318
17.5958
17.9167
20.0565
12.5133
17.1802
20.1558
15.9652
14.3045
12.8062
18.9448
23.7316
16.1449
15.4063
16.0696
23.5351
17.5958
12.2938
11.11
9.96455
11.1279
22.0819
23.2786
19.523
15.2464
26.7279
13.5307
21.2458
16.4776
19.0199
11.5546
23.2244
12.3908
19.6463
16.5444
11.1793
9.70657
19.9269
18.1892
13.0924
20.8627
16.0866
18.8932
18.7069
16.914
12.5128
18.5875
15.563
14.3595
14.8796
18.1023
14.4949
16.5793
12.8442
14.1341
21.1409
14.1689
14.7435
19.7013
16.9856
15.2997
14.3842
16.6834
16.3917
23.1671
15.8243
22.3032
18.4956
15.7427
17.0043
19.5329
19.508
20.5407
12.3097
15.2057
19.6791
15.5925
7.87172
12.5128
12.6335
10.7135
16.5535
17.2034
12.5142
22.7125
10.5938
19.8627
22.2814
19.1428
18.3211
15.3264
21.1389
11.8493
19.4058
18.8912
15.3264
15.8645
17.988
17.6667
15.3966
14.0716
14.0716
13.8967
13.5295
13.6293
13.2334
16.3246
21.6619
9.22427
14.9381
7.85569
15.1478
12.2846
20.7118
20.0246
11.1793
15.7856
20.5532
26.5478
15.9652
16.4897
18.0584
14.012
14.8408
15.8013
17.8765
14.5186
12.2018
14.1934
16.706
16.4613
15.5925
16.9344
15.5296
18.3795
19.9152
12.6105
21.0459
16.5289
13.6288
15.553
17.3042
15.9615
15.2513
22.3635
14.5567
8.90582
14.7475
16.5444
8.02186
17.2187
14.6469
11.2043
14.3758
12.3908
14.6155
12.6335
14.1934
16.4148
18.6074
15.7284
19.6635
13.9213
14.3595
13.5957
16.453
25.2492
11.8275
15.0753
19.6549
27.9481
12.2545
23.8795
20.3461
14.7194
13.4457
18.3023
19.3443
22.3339
24.7027
23.2826
15.6253
26.4519
19.314
21.0059
26.6344
15.1127
10.9277
13.4457
15.2614
12.9734
16.5018
19.2508
22.3358
14.2789
16.5949
14.5105
14.8334
13.8718
18.4041
15.0156
16.354
10.3634
12.5199
12.0085
20.11
12.1604
23.939
19.0424
9.53557
17.7345
14.6762
9.52768
16.9156
29.3312
14.9563
24.1694
20.2647
11.0133
13.134
9.52768
17.4224
18.6837
15.6154
19.5125
17.2516
20.2764
10.4948
14.1112
20.2565
15.9007
12.3749
9.57245
15.8043
22.3988
20.0926
7.51585
19.8403
19.9952
11.1364
12.5199
26.4086
13.3734
16.2752
21.7515
15.8745
11.0155
14.2975
23.5469
12.1502
12.0266
21.6699
14.889
25.4511
16.7252
19.4264
15.0753
11.6248
19.4524
8.6459
8.36336
8.90337
15.1605
18.102
15.2938
26.5221
22.8933
24.7442
12.8343
13.8222
20.7336
18.6934
11.8419
18.1623
23.5377
17.9656
21.9503
12.7103
15.8082
23.6743
24.1003
15.2123
14.6184
16.5057
20.8039
15.9886
16.0821
18.2385
16.2009
18.7914
18.4774
10.3562
19.4944
18.5739
8.23993
13.2242
22.4313
18.4513
15.67
10.777
14.8433
15.187
14.9095
11.0444
14.4277
17.0163
19.4636
13.645
17.5251
8.12315
12.4315
21.6923
21.3415
12.8183
23.1093
10.6916
5.78626
22.8133
20.4871
23.1525
14.4658
10.9403
20.4871
14.889
19.3727
13.526
27.5025
20.0901
7.44441
13.2331
13.4976
17.9006
13.5535
21.0761
15.7395
13.9277
11.2073
14.1193
24.6694
19.6549
23.0957
17.2395
28.0205
8.69666
12.1436
24.1003
16.6613
22.3241
14.9563
20.1988
12.4315
20.8969
20.5603
18.8002
23.6619
21.6742
8.92826
14.1428
11.7392
16.1838
16.3352
15.9335
17.7182
17.743
17.7522
13.134
13.9277
15.1929
17.4774
16.1347
18.8085
16.6383
16.6594
21.0681
22.3279
13.7856
13.4425
14.5105
17.1084
19.8979
16.7802
16.9143
5.59586
11.8419
16.7252
21.5412
21.9374
5.59586
22.2054
16.1633
21.0228
14.3267
15.1322
11.2073
14.1026
23.8146
19.4045
14.1621
19.2863
7.95302
21.3261
13.3734
14.8644
18.6089
14.6359
17.3221
12.6505
25.4189
13.5535
8.6459
16.5949
11.432
12.0085
18.1287
9.75981
13.5877
14.2059
25.5724
24.4952
18.3406
14.5026
16.8772
23.8216
19.3398
29.0988
17.5276
12.8343
22.6473
22.4061
10.6059
20.6081
15.3409
14.8102
20.8039
21.5198
14.8644
12.6505
13.8437
10.4147
9.85786
12.571
20.837
18.5996
24.2901
20.9942
15.9335
17.5827
23.6619
17.2395
17.5695
15.0717
17.8832
16.5057
13.0234
16.8713
8.23993
13.8986
20.0906
20.0171
16.8022
15.6962
18.1287
11.9911
[truncated: 48,980 more rows]
